# Supplementary material for: Supramolecular luminescent Pt(ii) tweezers: aggregation studies and 1O2 production
Source: Royal Society of Chemistry journal article supplement (doi:10.1039/d3qi01176c), 2023-01-01
Supplement: d3qi01176c1.pdf [file d3qi01176c1.pdf]

# Supramolecular luminescent Pt(II) tweezers. Aggregation studies and $^1\text{O}_2$ production.

Guillermo Romo-Islas,<sup>a,b</sup> Rosa M. Gomila,<sup>c</sup> Antonio Frontera<sup>c,\*</sup> and Laura Rodríguez<sup>a,b,\*</sup>

<sup>a</sup> *Departament de Química Inorgànica i Orgànica, Secció de Química Inorgànica, Universitat de Barcelona, Martí i Franquès 1-11, E-08028 Barcelona, Spain. e-mail: laurarodriguezr@ub.edu*

<sup>b</sup> *Institut de Nanociència i Nanotecnologia (IN2UB). Universitat de Barcelona, 08028 Barcelona, Spain*

<sup>c</sup> *Departament de Química, Universitat de les Illes Balears, 07071 Palma de Mallorca, Spain. e-mail: toni.frontera@uib.es*

## Supporting Information

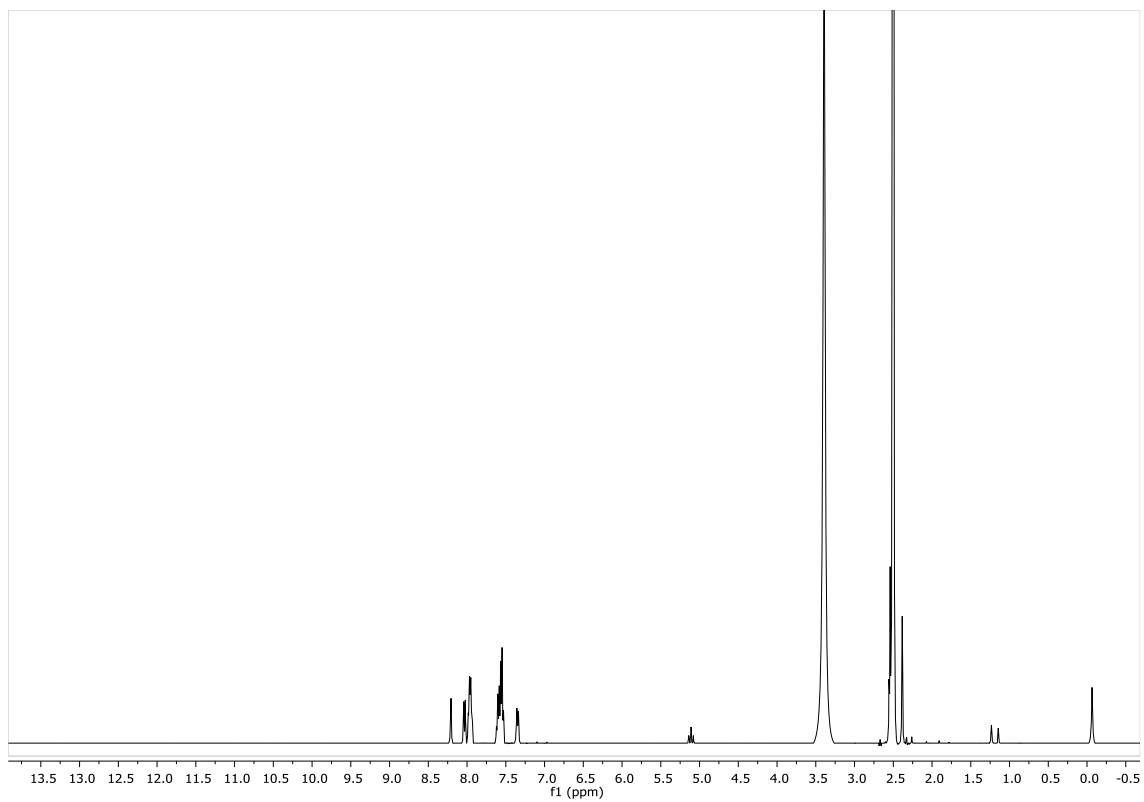

**Figure S1.** <sup>1</sup>H NMR spectrum of complex **10** in DMSO-d<sup>6</sup>.

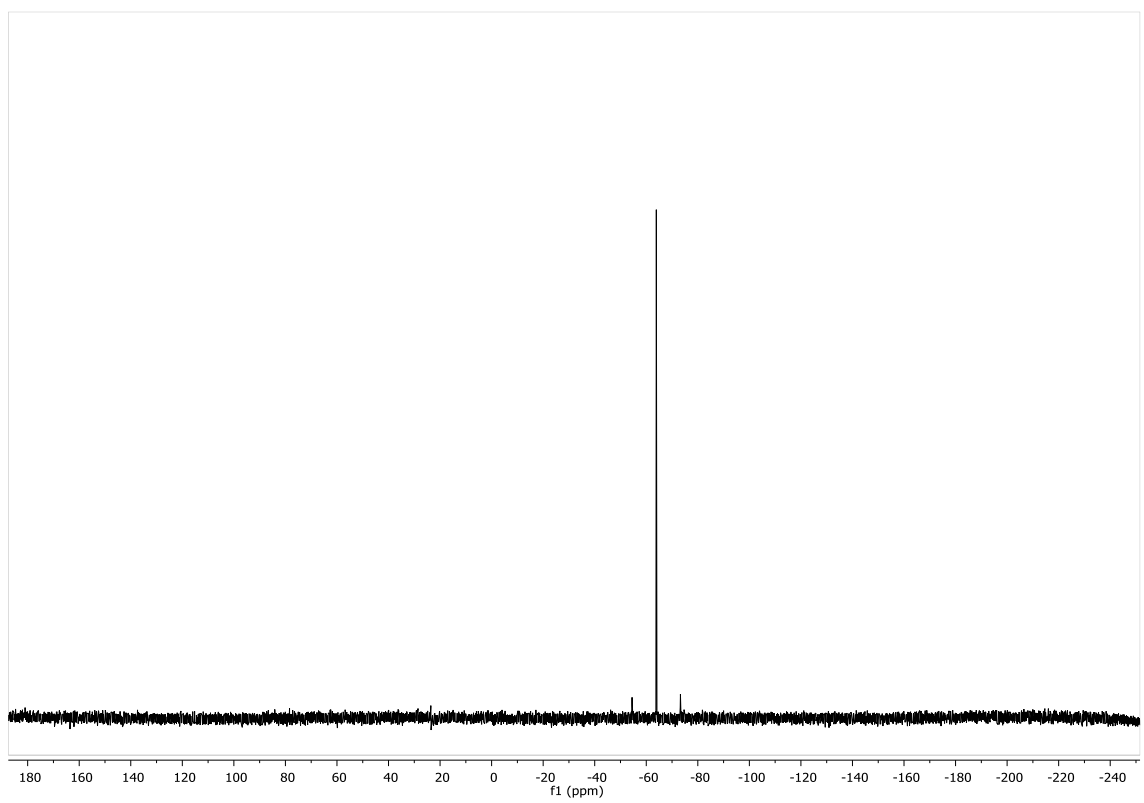

**Figure S2.** <sup>31</sup>P NMR spectrum of complex **10** in DMSO-d<sup>6</sup>.

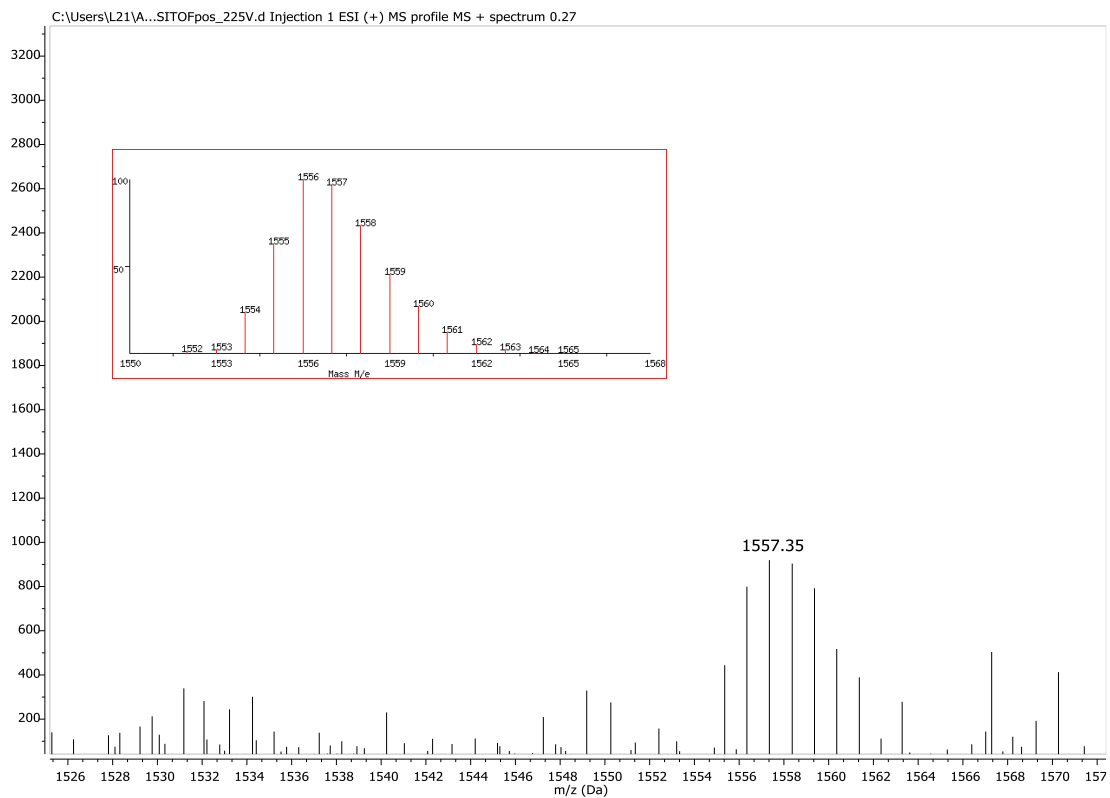

**Figure S3.** ESI-TOF(+) of complex **10**. Inset: calculated isotopic pattern.

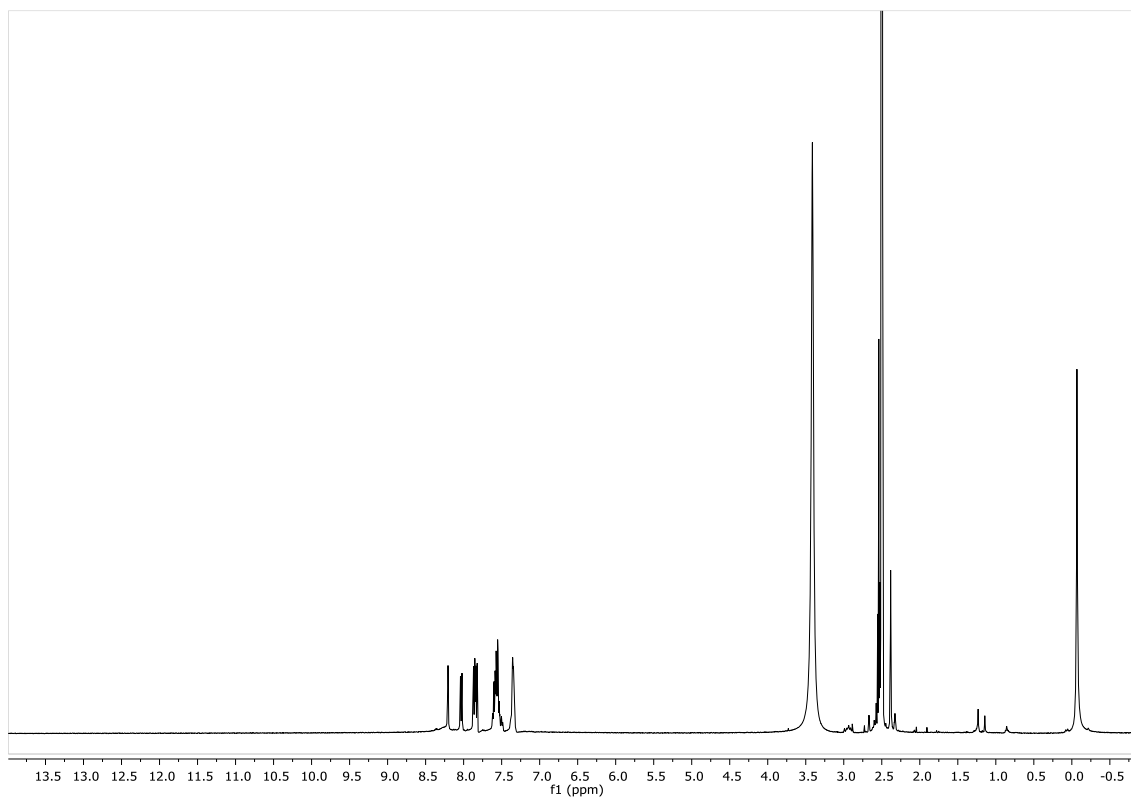

**Figure S4.**  $^1\text{H}$  NMR spectrum of complex **11** in  $\text{DMSO-d}_6$ .

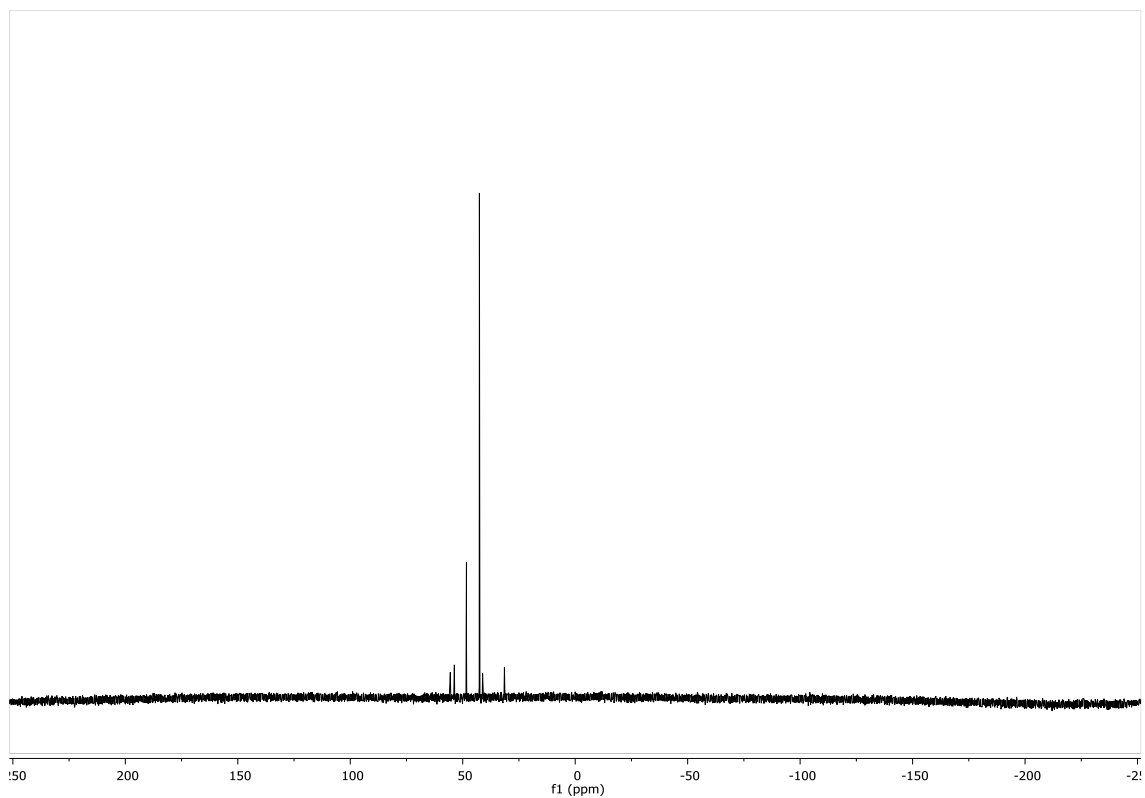

**Figure S5.**  $^{31}\text{P}$  NMR spectrum of complex **11** in  $\text{DMSO-d}_6$ .

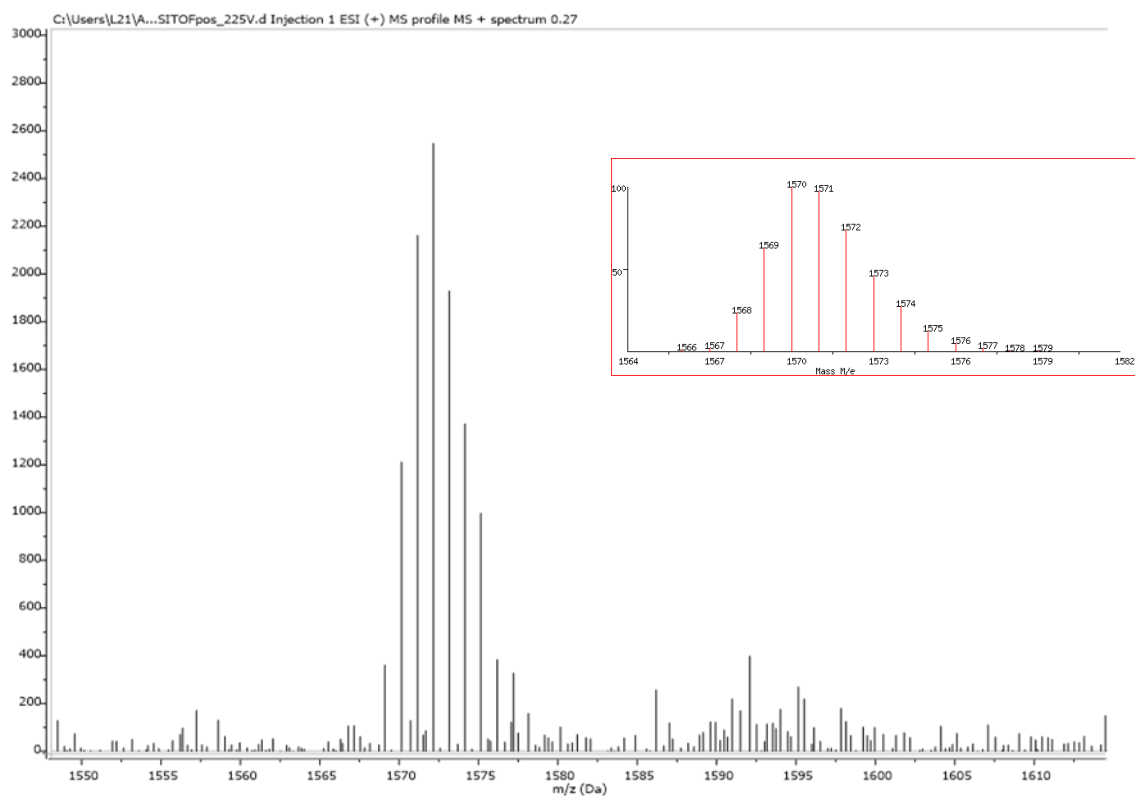

**Figure S6.** ESI-TOF(+) of complex **11**. Inset: calculated isotopic pattern.

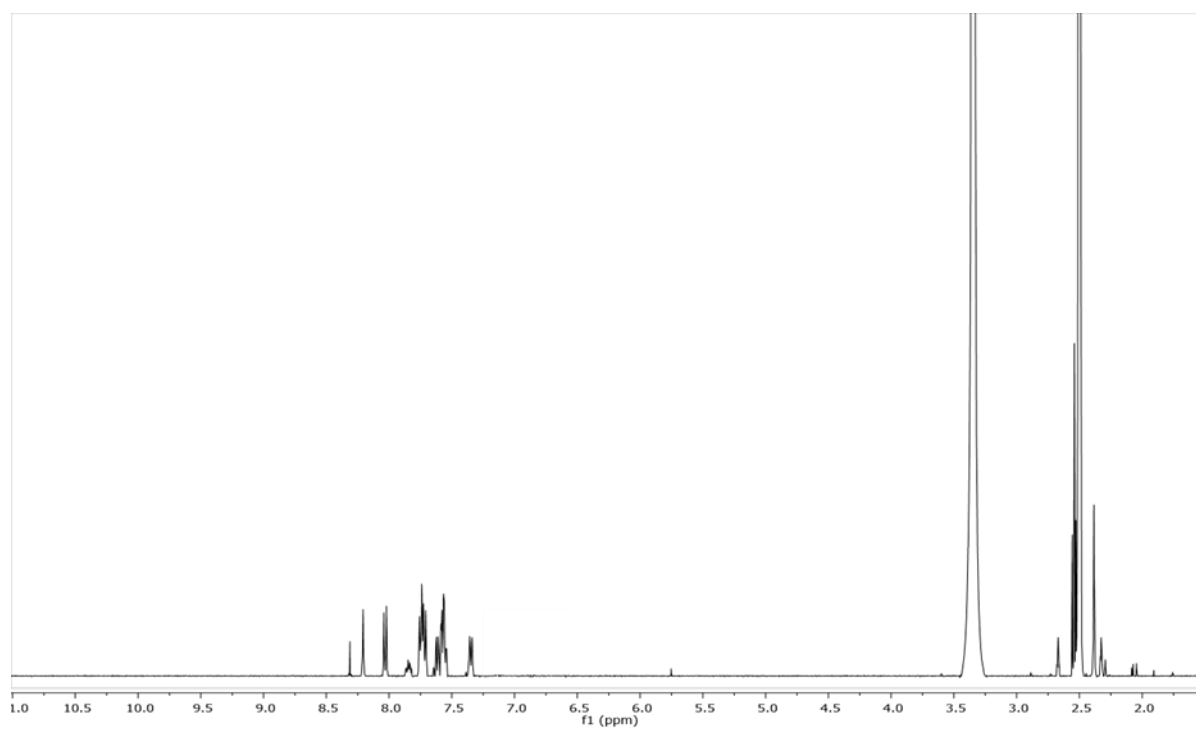

**Figure S7.**  $^1\text{H}$  NMR spectrum of complex **12** in  $\text{DMSO-d}_6$ .

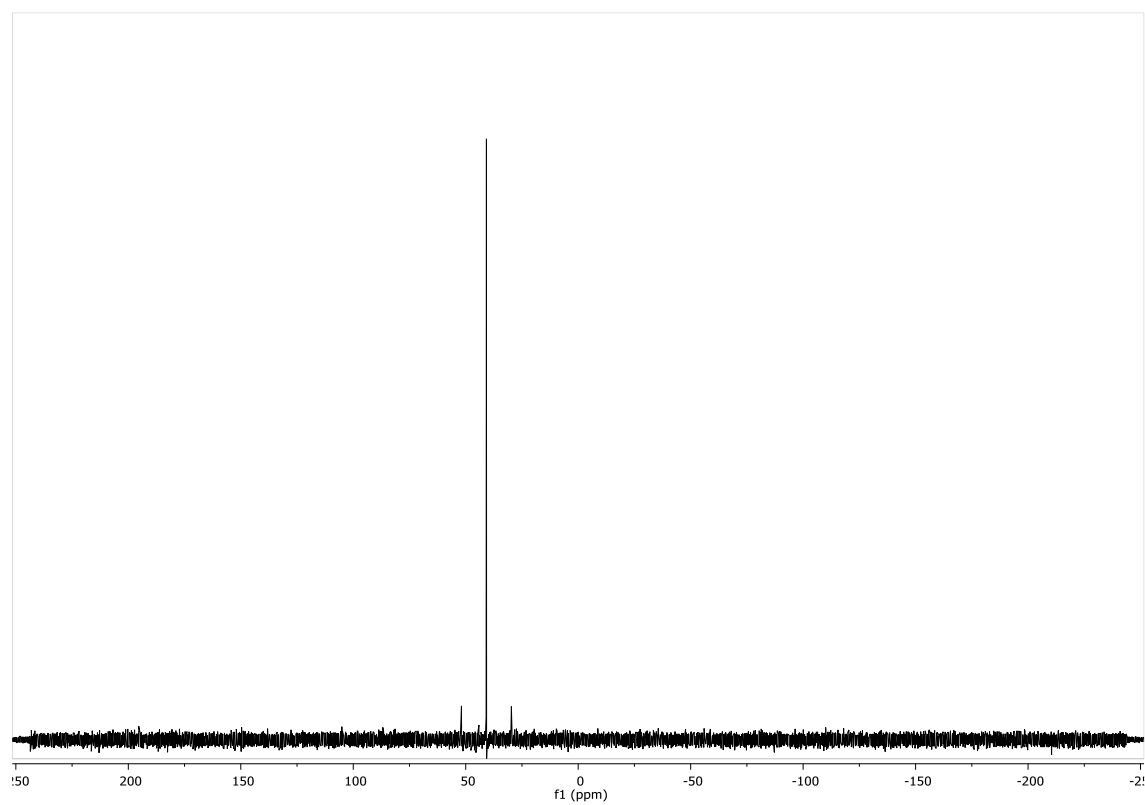

**Figure S8.**  $^{31}\text{P}$  NMR spectrum of complex **12** in  $\text{DMSO-d}_6$ .

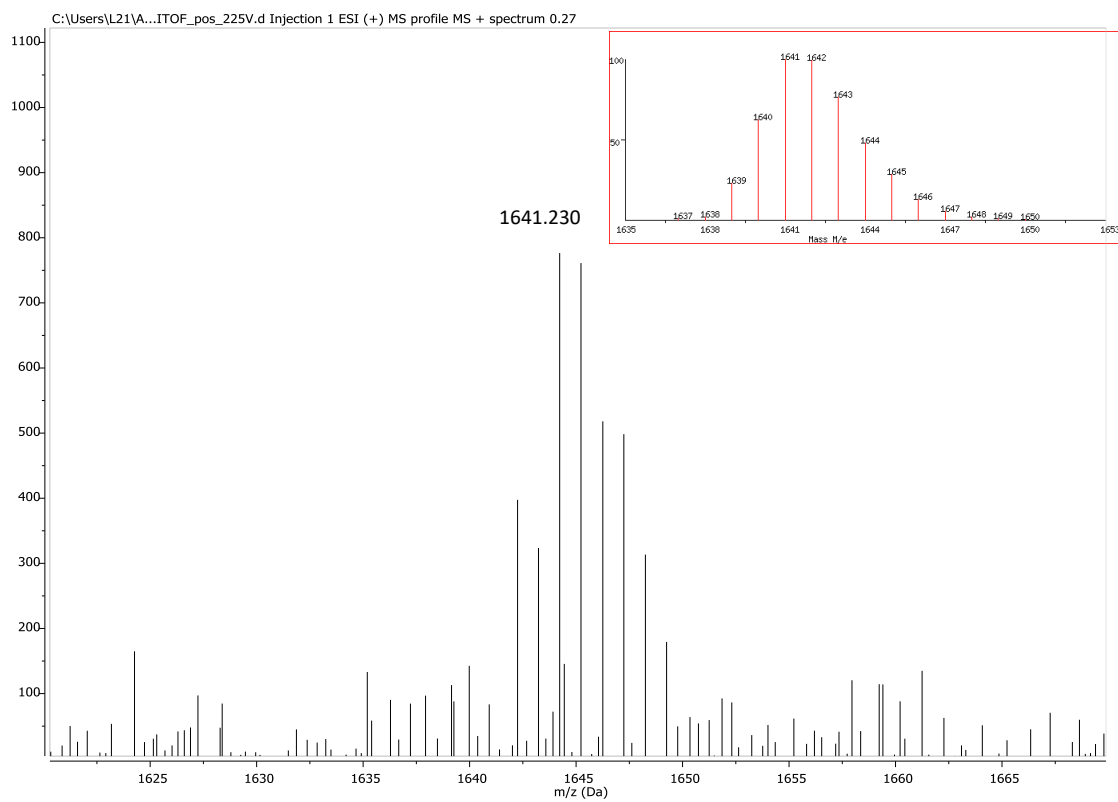

**Figure S9.** ESI-TOF(+) of complex **12**. Inset: calculated isotopic pattern.

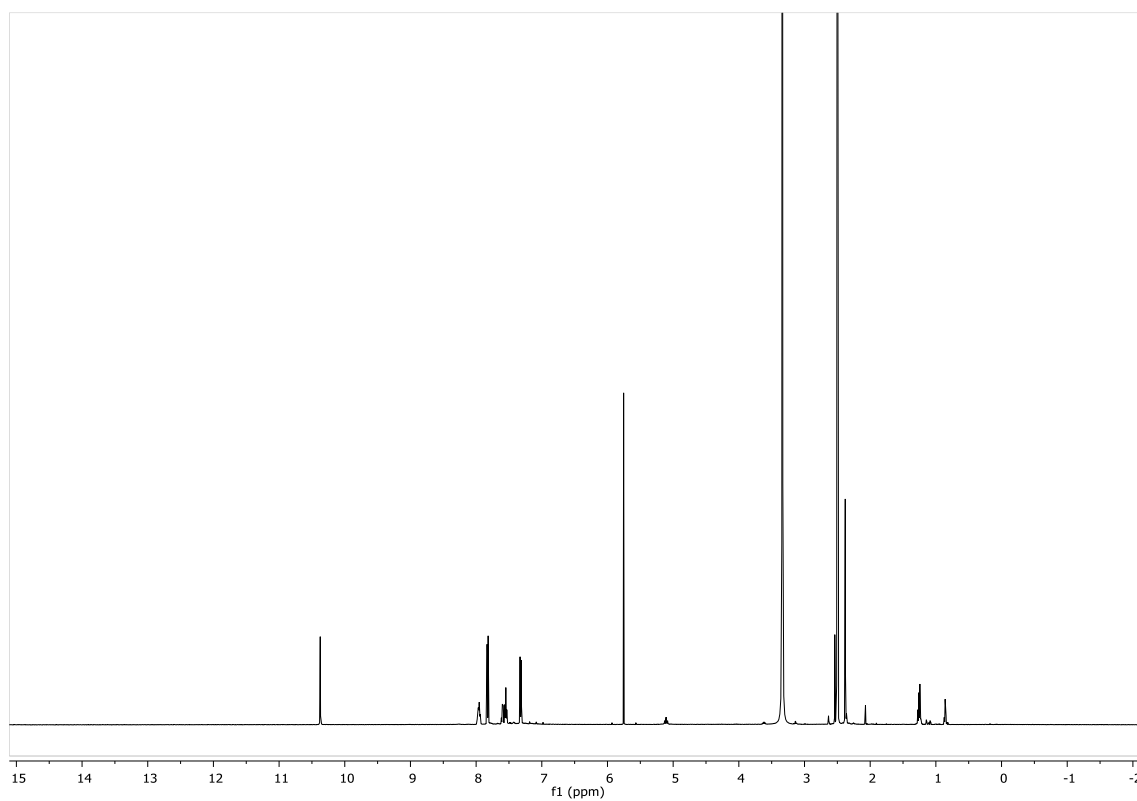

**Figure S10.**  $^1\text{H}$  NMR spectrum of complex **13** in  $\text{DMSO-d}_6$ .

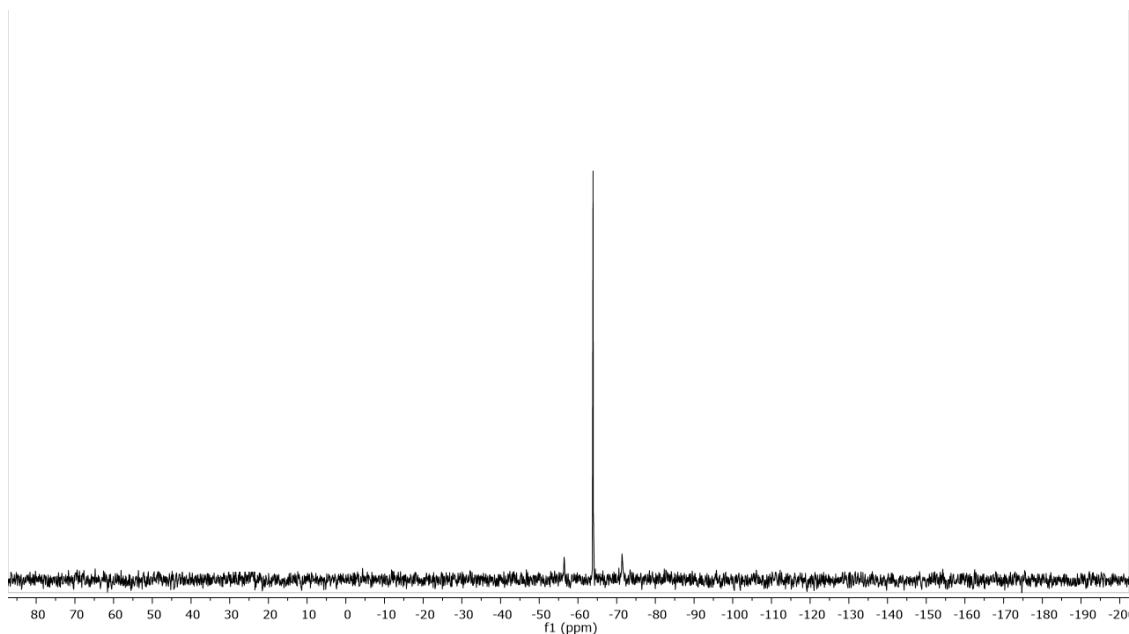

**Figure S11.**  $^{31}\text{P}$  NMR spectrum of complex **13** in  $\text{DMSO-d}_6$ .

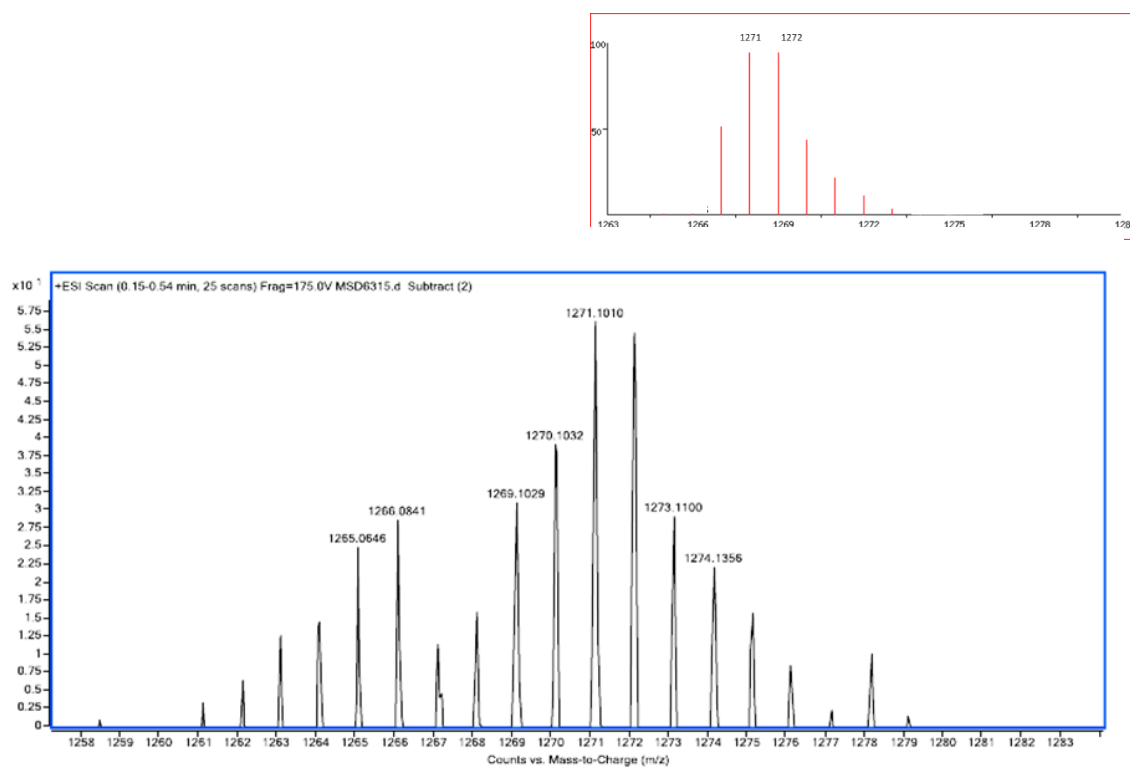

**Figure S12.** ESI-TOF(+) of complex **13**. Inset: calculated isotopic pattern.

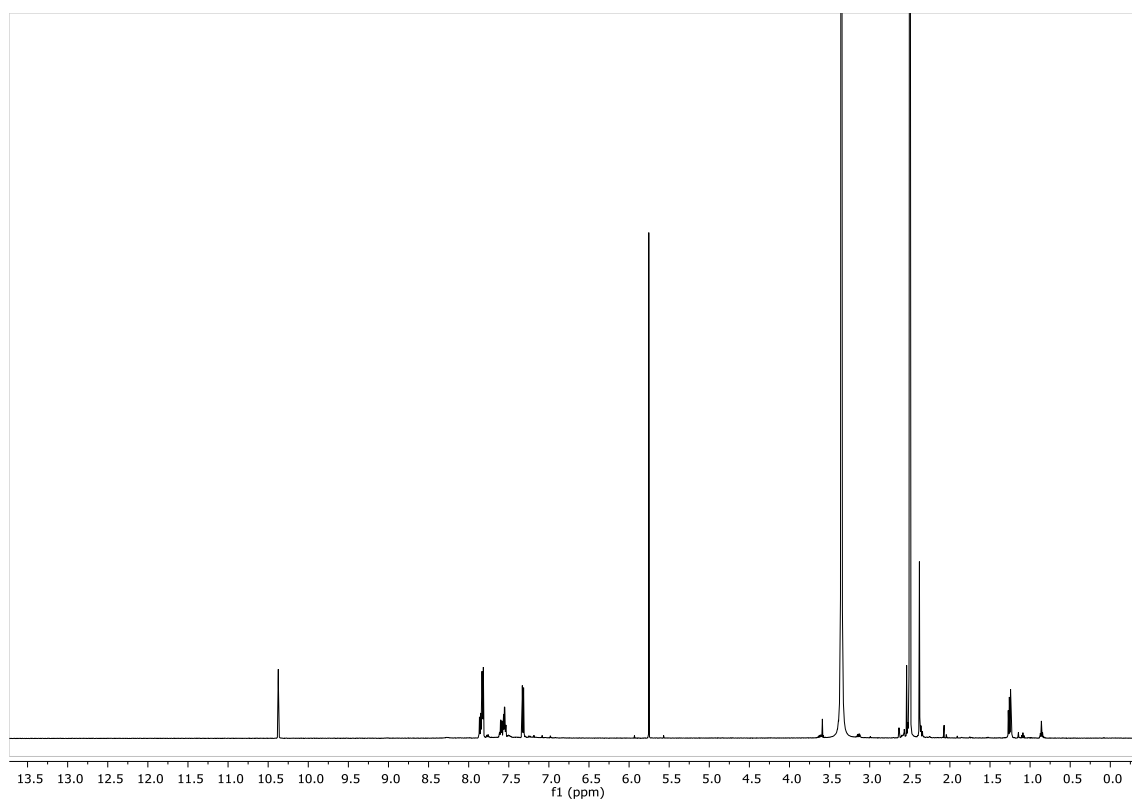

**Figure S13.**  $^1\text{H}$  NMR spectrum of complex **14** in  $\text{DMSO-d}_6$ .

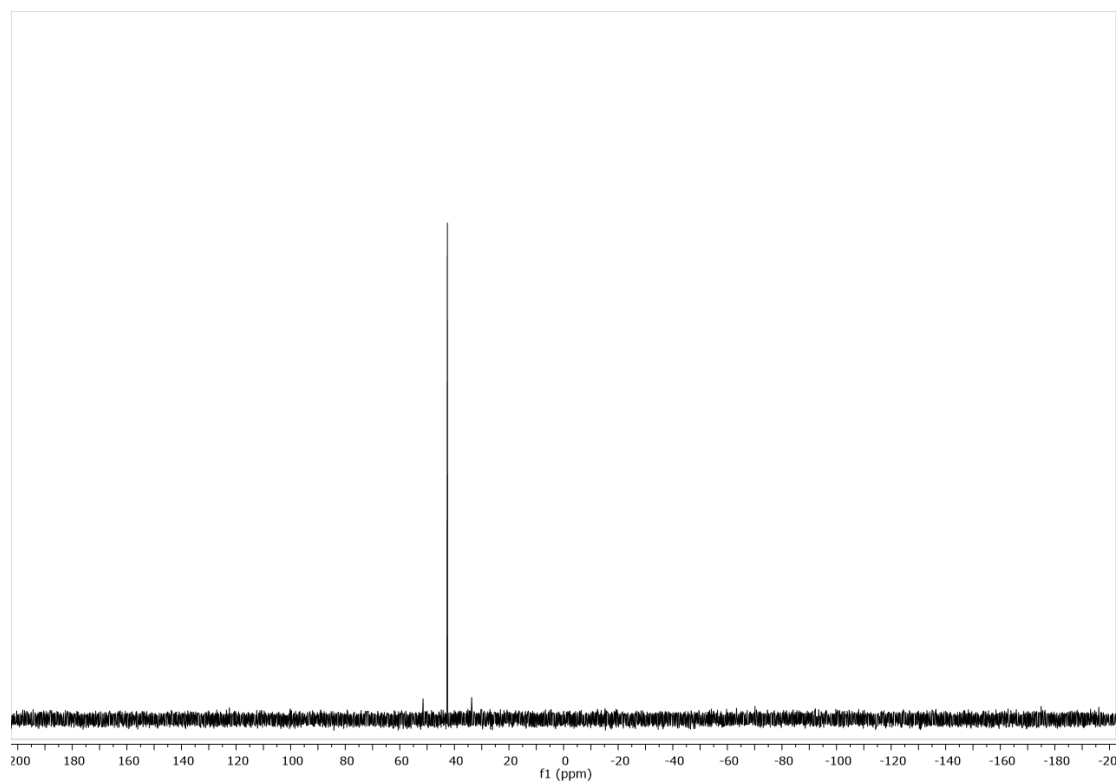

**Figure S14.**  $^{31}\text{P}$  NMR spectrum of complex **14** in  $\text{DMSO-d}_6$ .



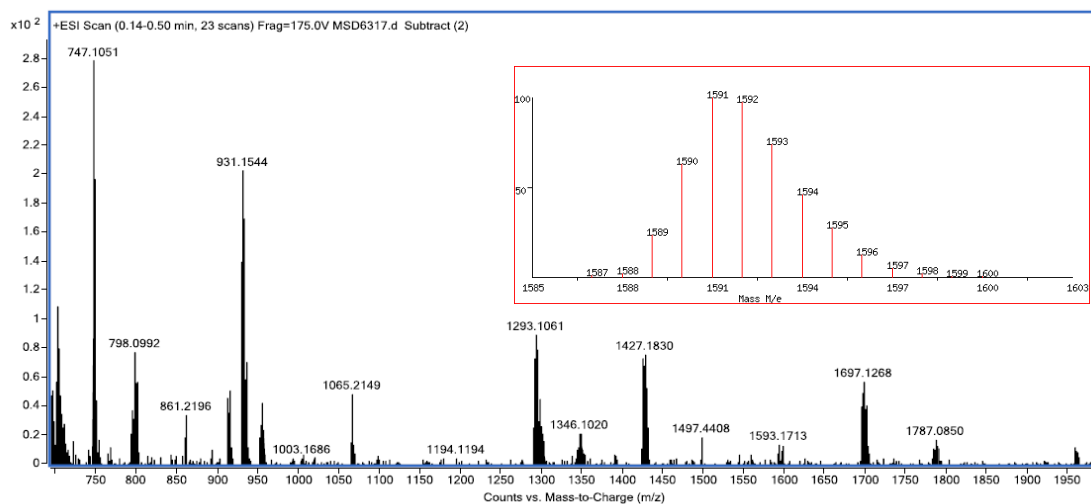

**Figure S15.** ESI-TOF(+) of complex **14**. Inset: calculated isotopic pattern.

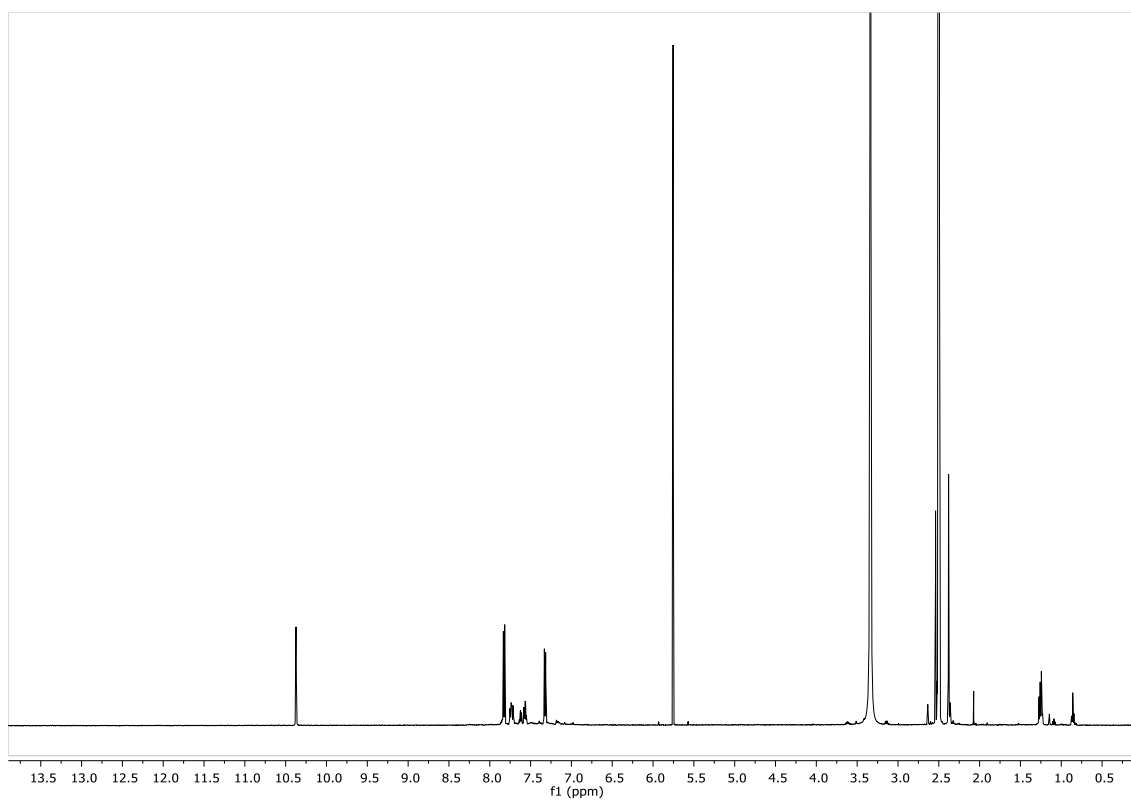

**Figure S16.**  $^1\text{H}$  NMR spectrum of complex **15** in  $\text{DMSO-d}_6$ .

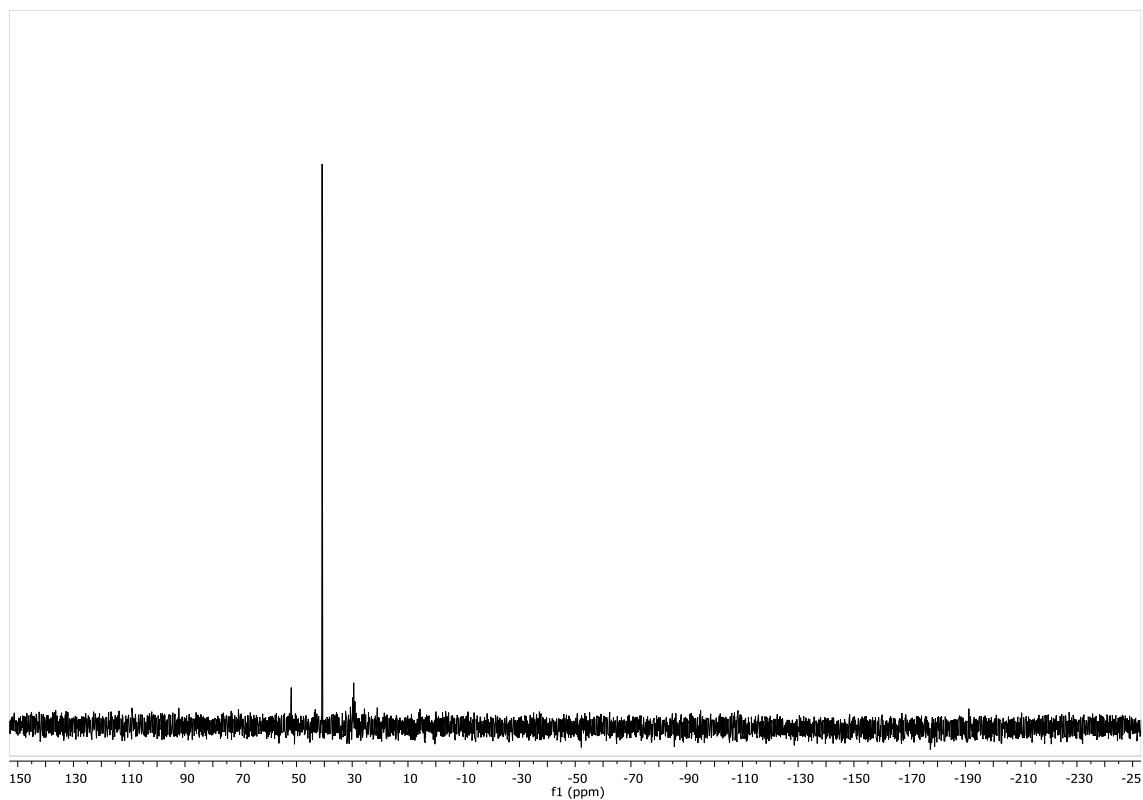

**Figure S17.**  $^{31}\text{P}$  NMR spectrum of complex **15** in  $\text{DMSO-d}_6$ .

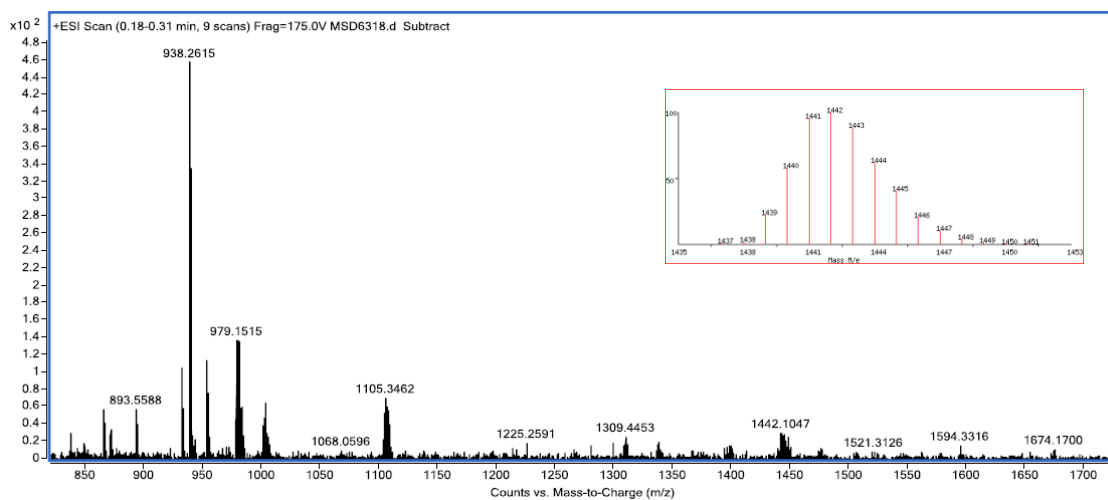

**Figure S18.** ESI-TOF(+) of complex **15**. Inset: calculated isotopic pattern.

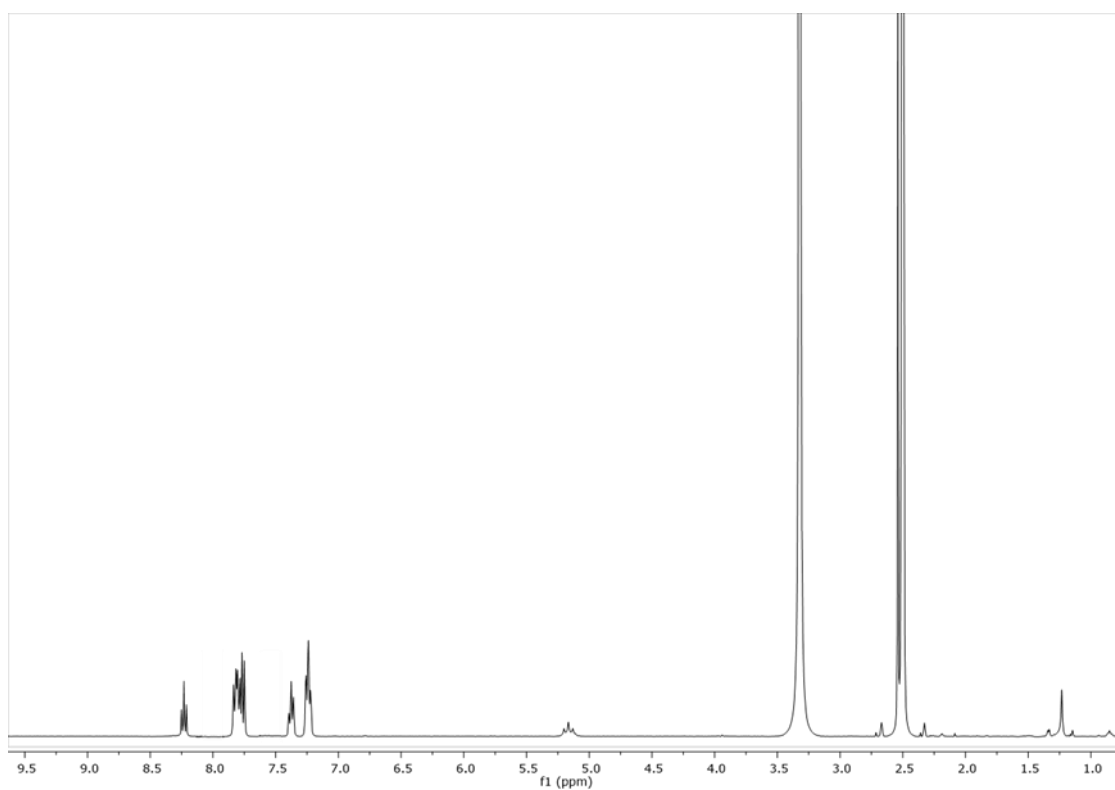

**Figure S19.**  $^1\text{H}$  NMR spectrum of complex **16** in  $\text{DMSO-d}_6$ .

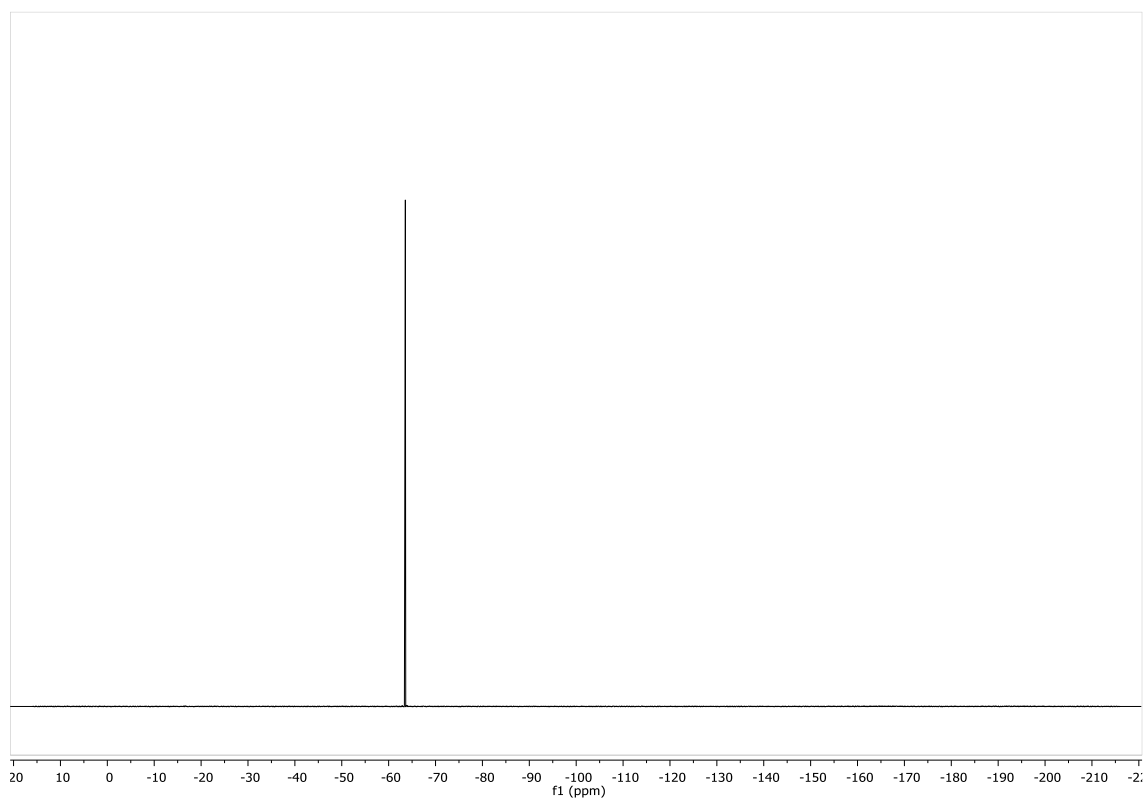

**Figure S20.**  $^{19}\text{F}$  NMR spectrum of complex **16** in  $\text{DMSO-d}_6$ .

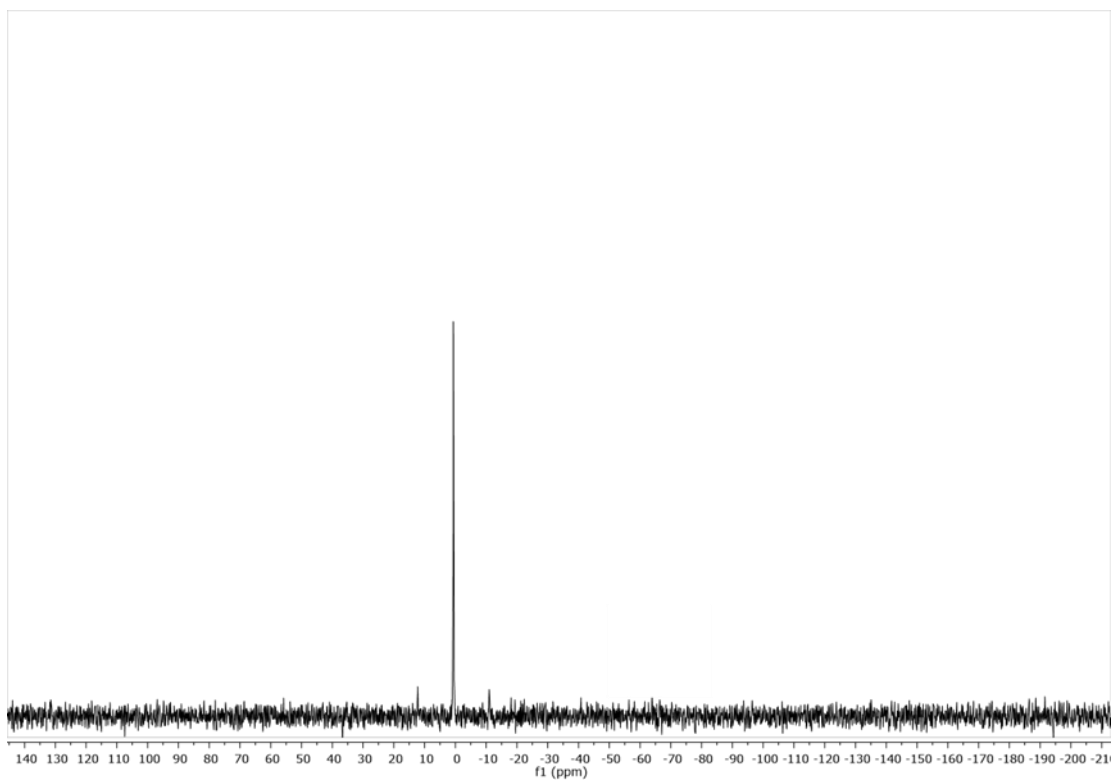

**Figure S21.**  $^{31}\text{P}$  NMR spectrum of complex **16** in DMSO- $d_6$ .

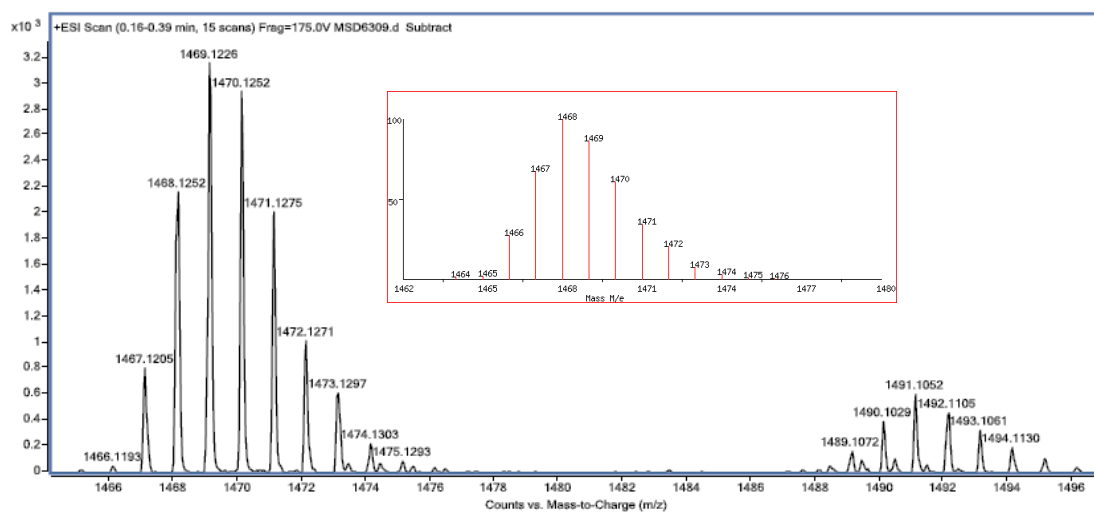

**Figure S22.** ESI-TOF(+) of complex **16**. Inset: calculated isotopic pattern.

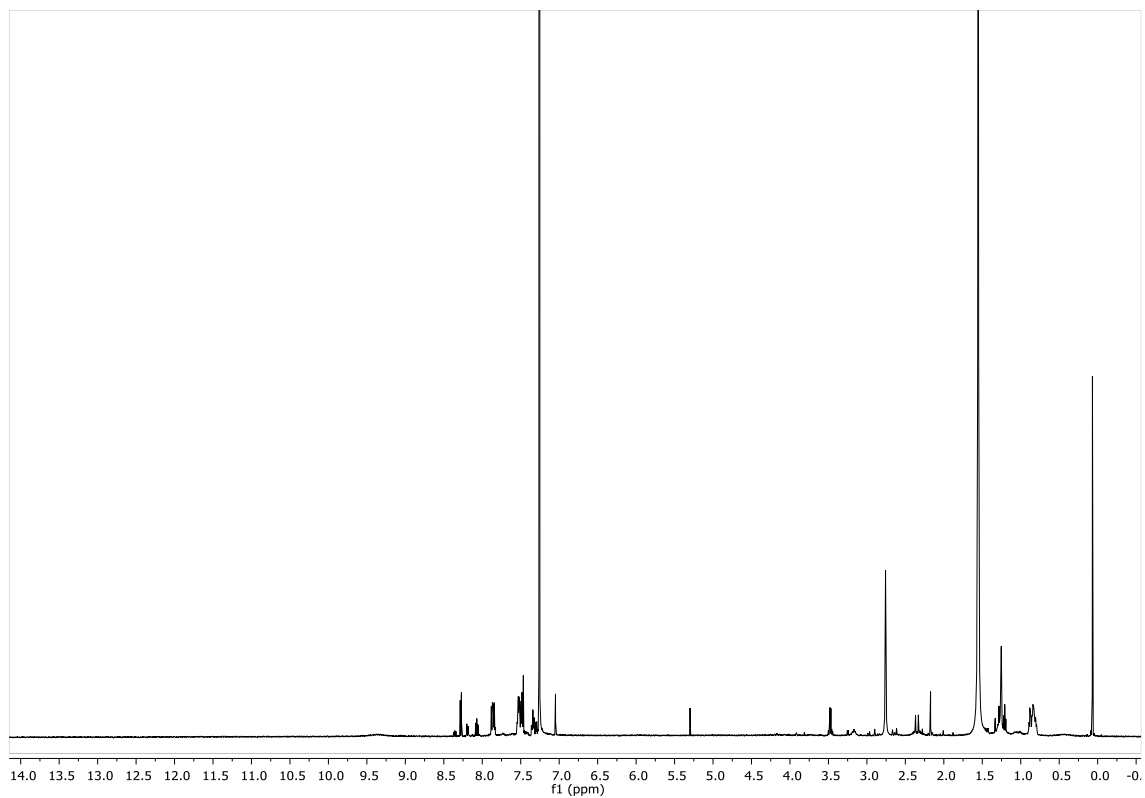

**Figure S23.**  $^1\text{H}$  NMR spectrum of complex **17** in  $\text{DMSO-d}^6$ .

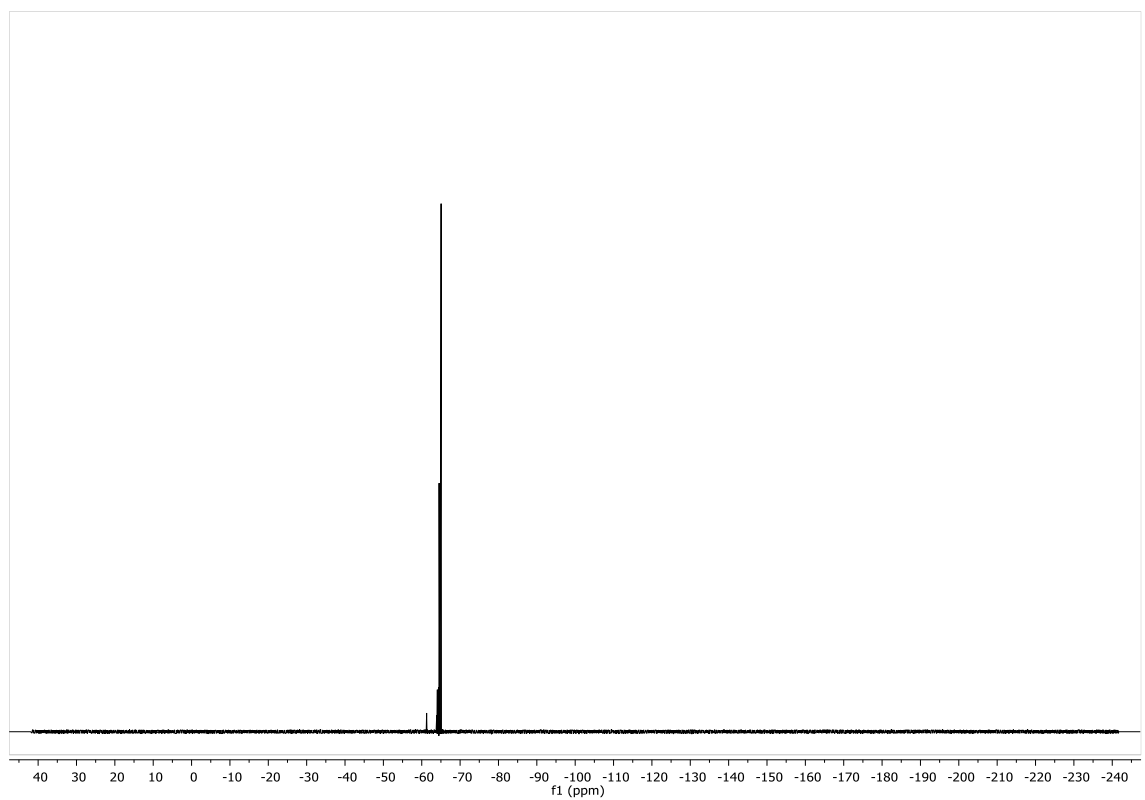

**Figure S24.**  $^{19}\text{F}$  NMR spectrum of complex **17** in  $\text{DMSO-d}^6$ .

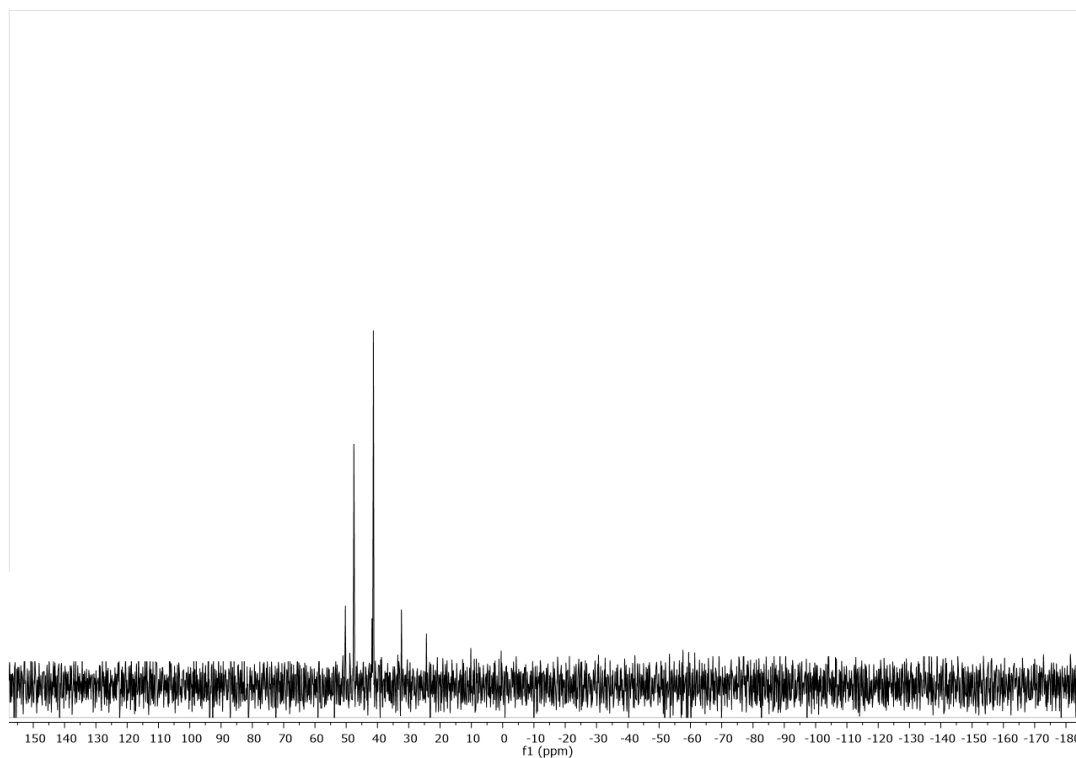

**Figure S25.**  $^{31}\text{P}$  NMR spectrum of complex **17** in  $\text{DMSO-d}^6$ .

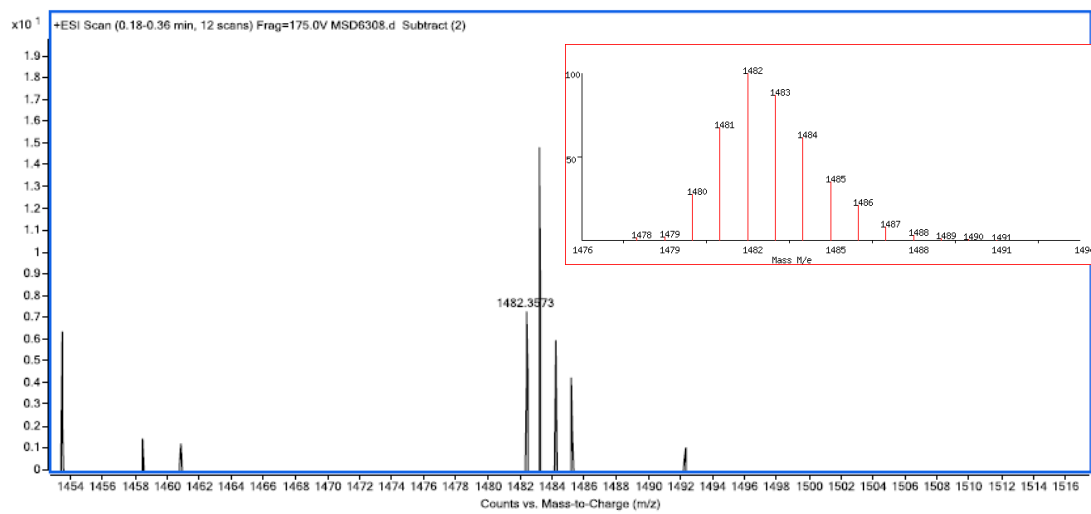

**Figure S26.** ESI-TOF(+) of complex **17**. Inset: calculated isotopic pattern.

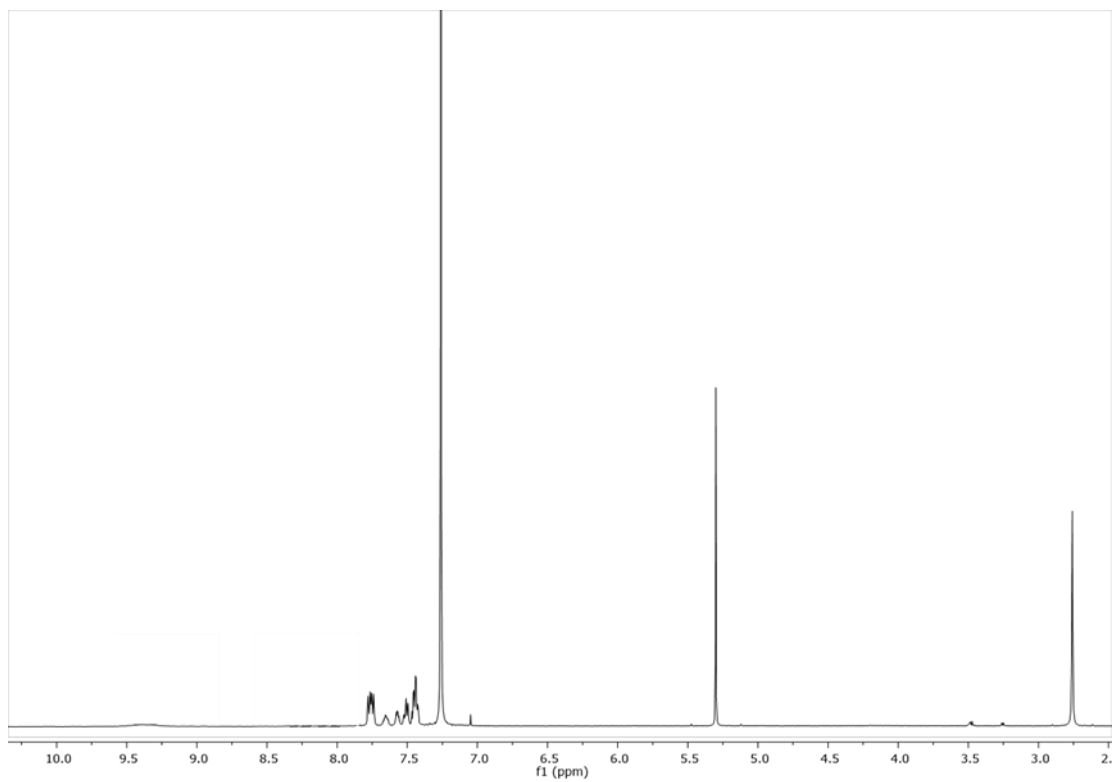

**Figure S27.**  $^1\text{H}$  NMR spectrum of complex **18** in  $\text{DMSO-d}^6$ .

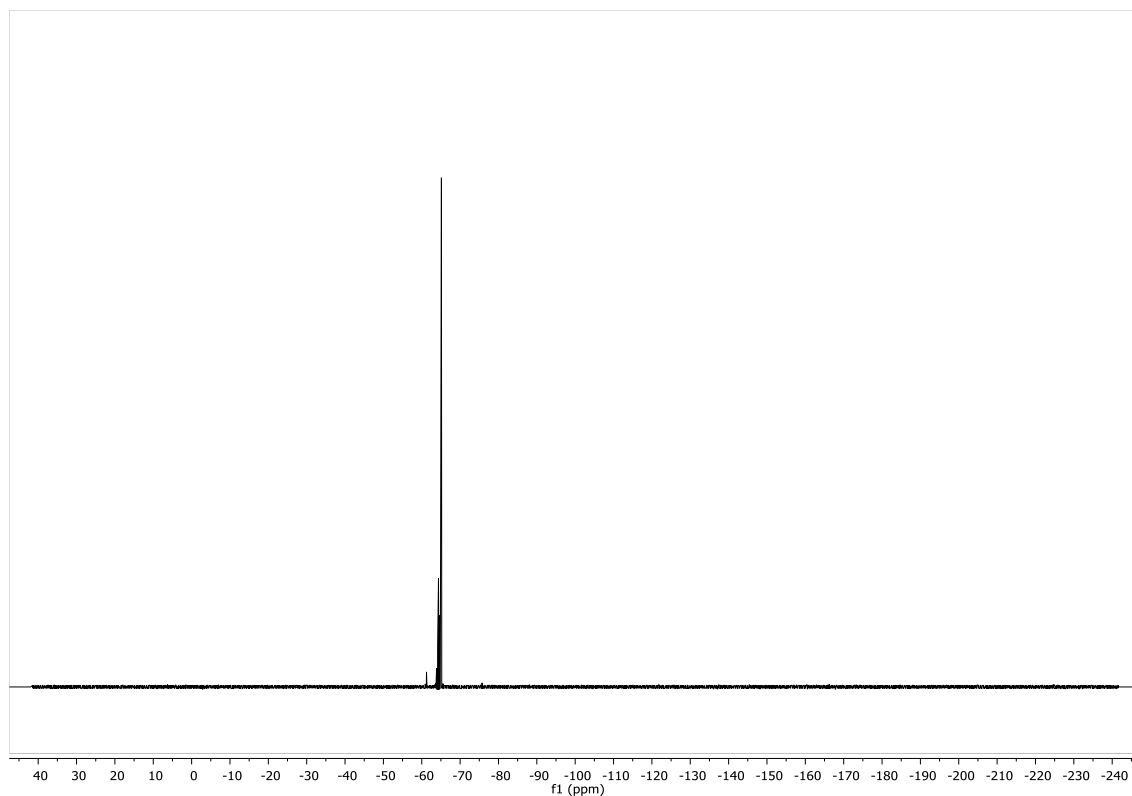

**Figure S28.**  $^{19}\text{F}$  NMR spectrum of complex **18** in  $\text{DMSO-d}^6$ .

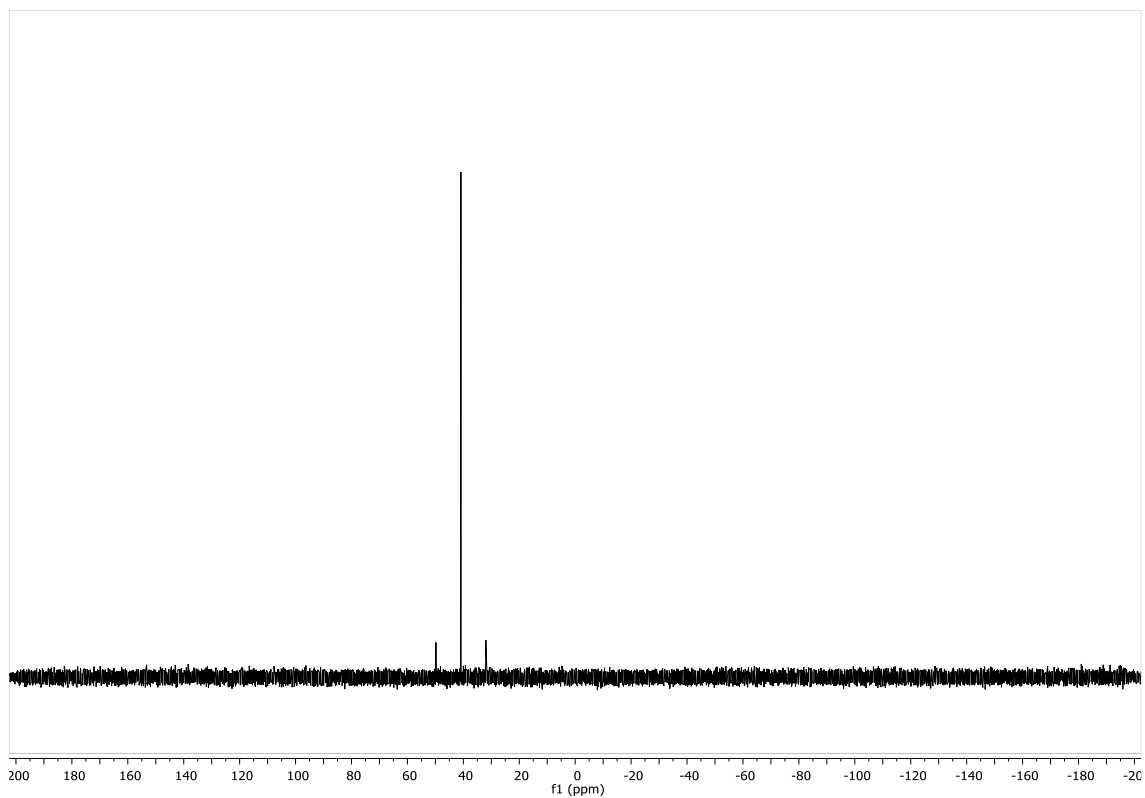

**Figure S29.**  $^{31}\text{P}$  NMR spectrum of complex **18** in  $\text{DMSO-d}_6$ .

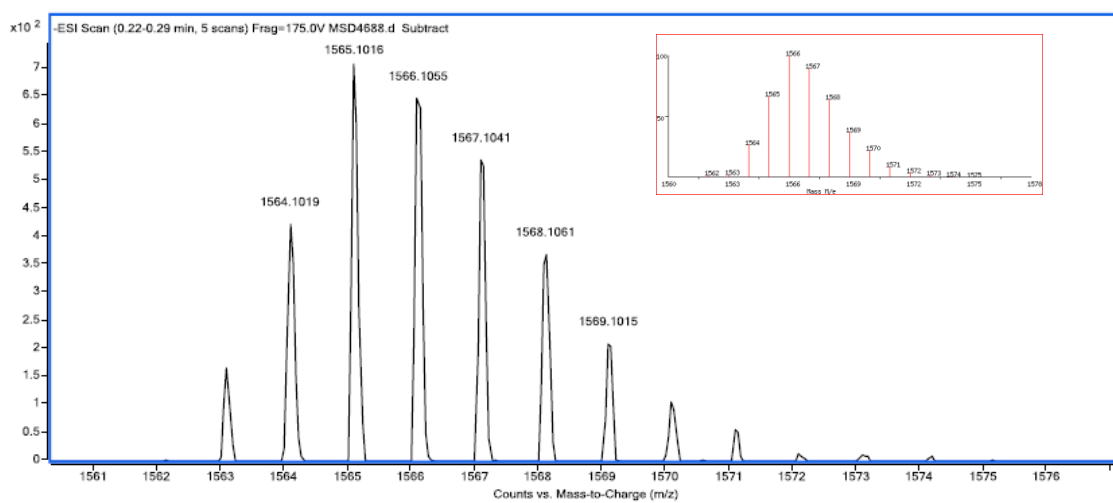

**Figure S30.** ESI-TOF(+) of complex **18**. Inset: calculated isotopic pattern.



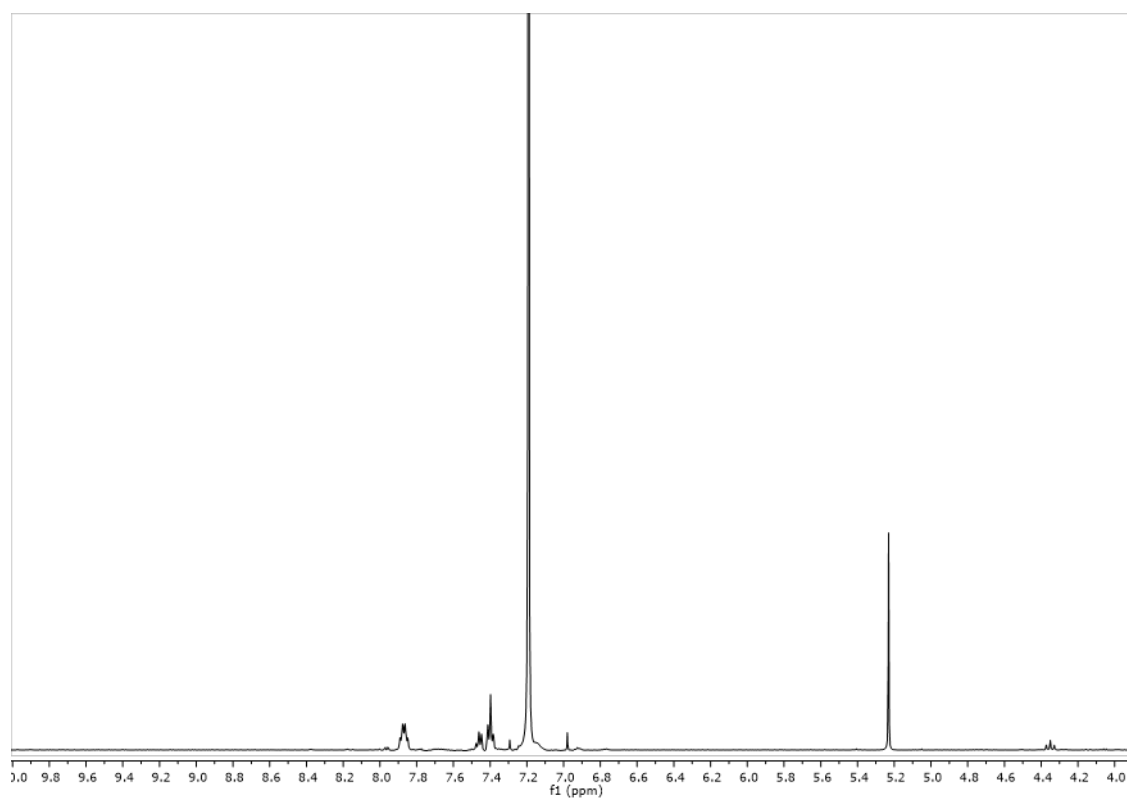

**Figure S31.**  $^1\text{H}$  NMR spectrum of complex **19** in  $\text{DMSO-d}_6$ .

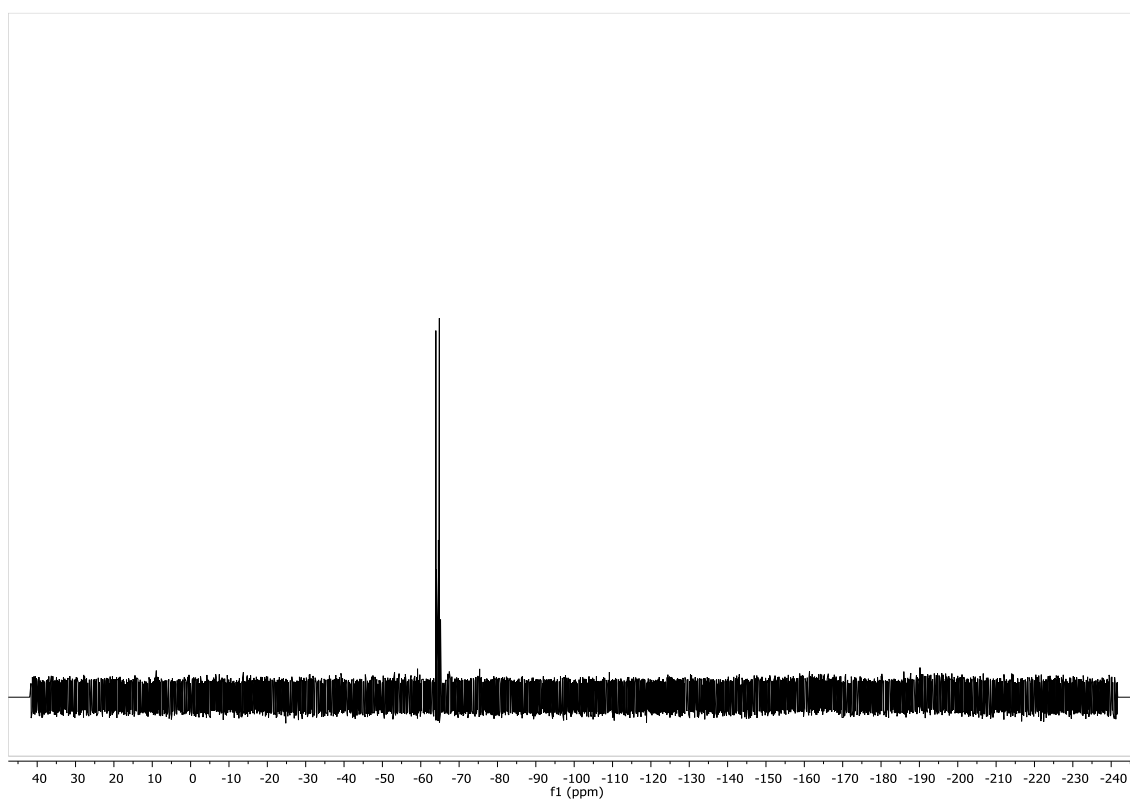

**Figure S32.**  $^{19}\text{F}$  NMR spectrum of complex **19** in  $\text{DMSO-d}_6$ .

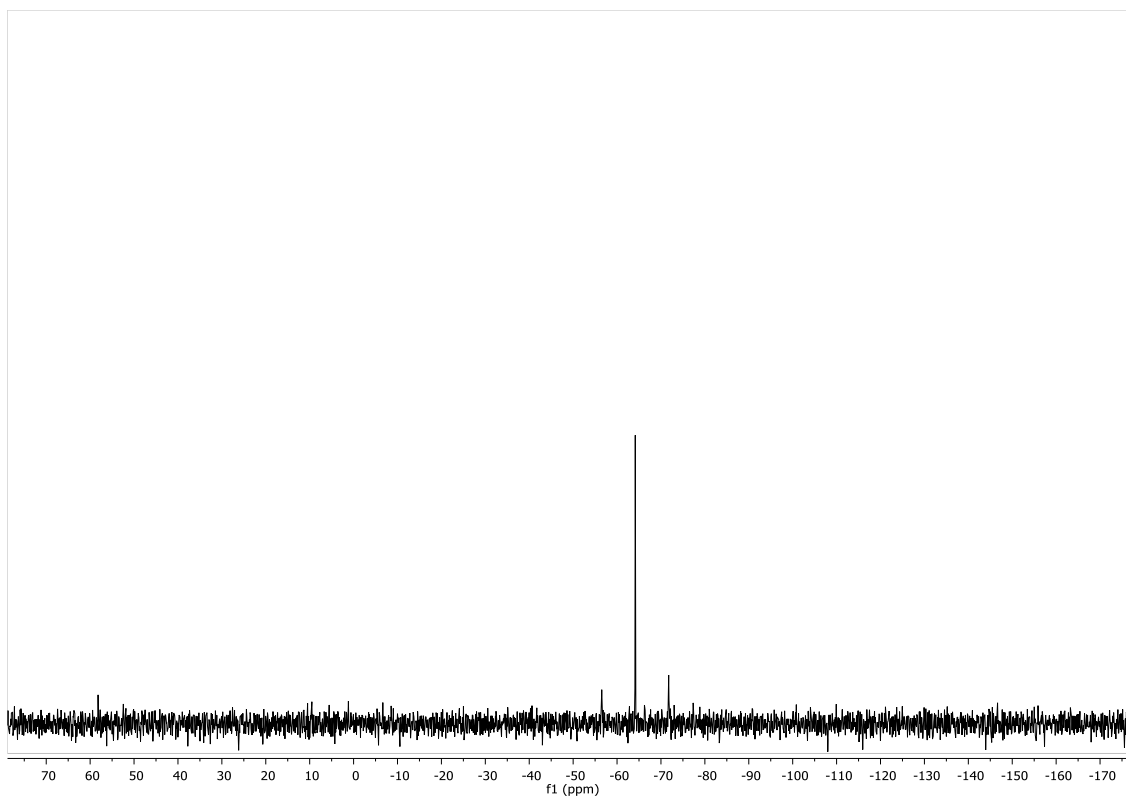

**Figure S33.**  $^{31}\text{P}$  NMR spectrum of complex **19** in  $\text{DMSO-d}_6$ .

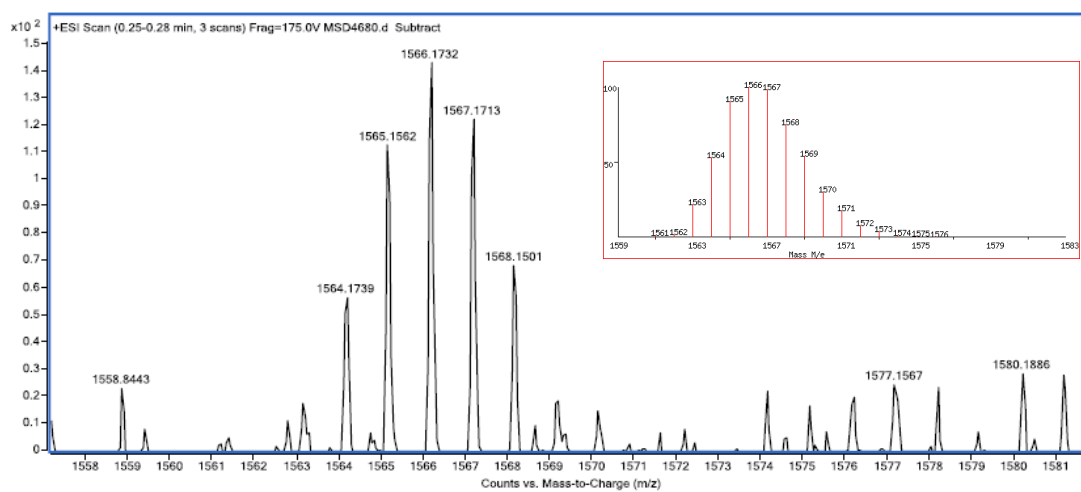

**Figure S34.** ESI-TOF(+) of complex **19**. Inset: calculated isotopic pattern.

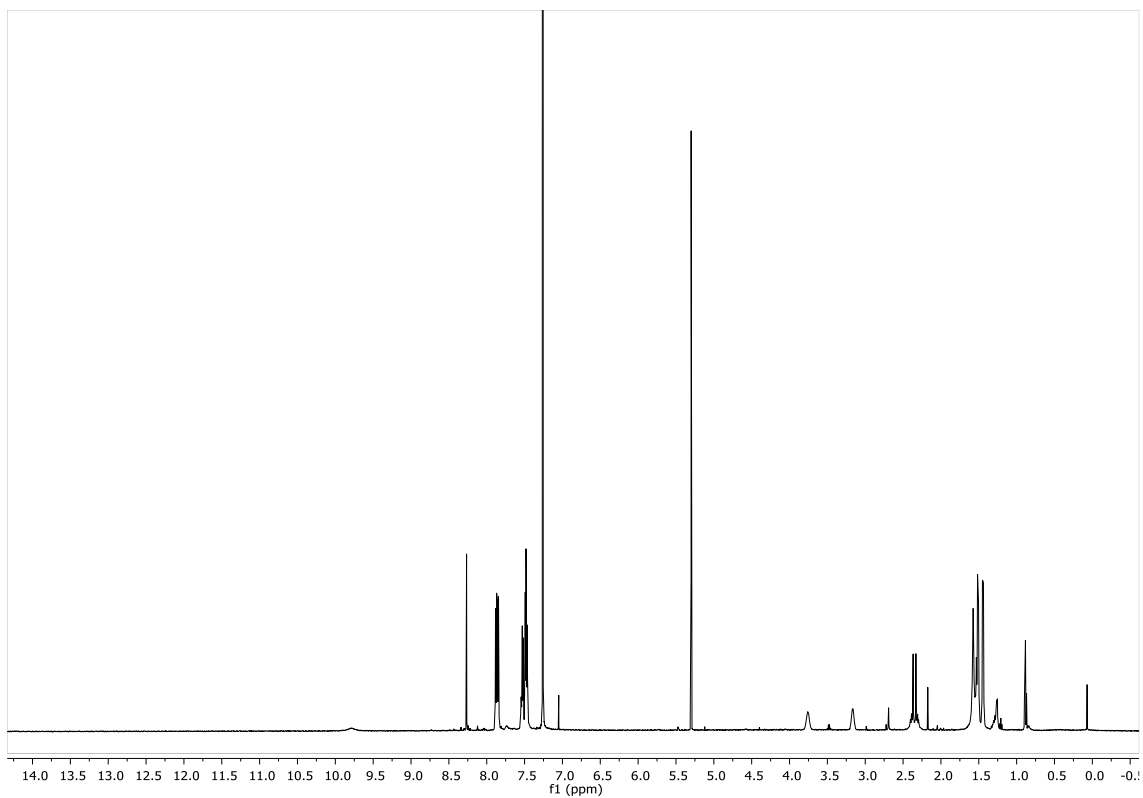

**Figure S35.**  $^1\text{H}$  NMR spectrum of complex **20** in  $\text{DMSO-d}_6$ .

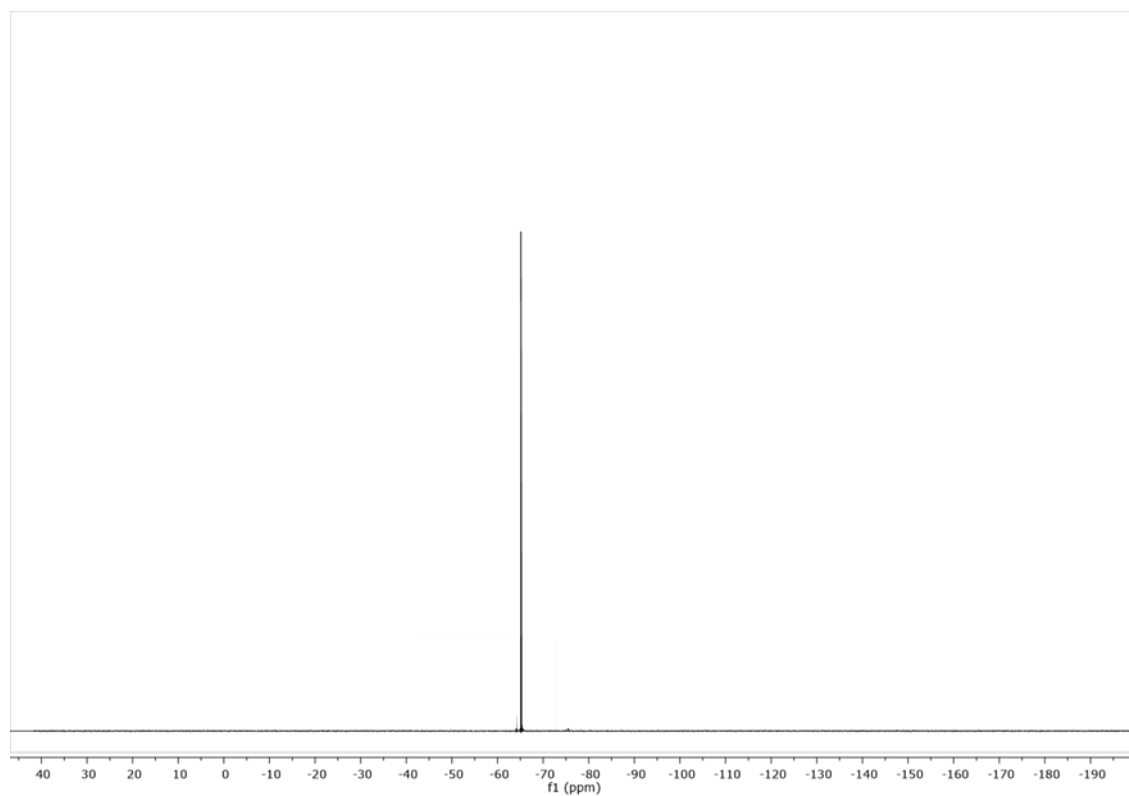

**Figure S36.**  $^{19}\text{F}$  NMR spectrum of complex **20** in  $\text{DMSO-d}_6$ .

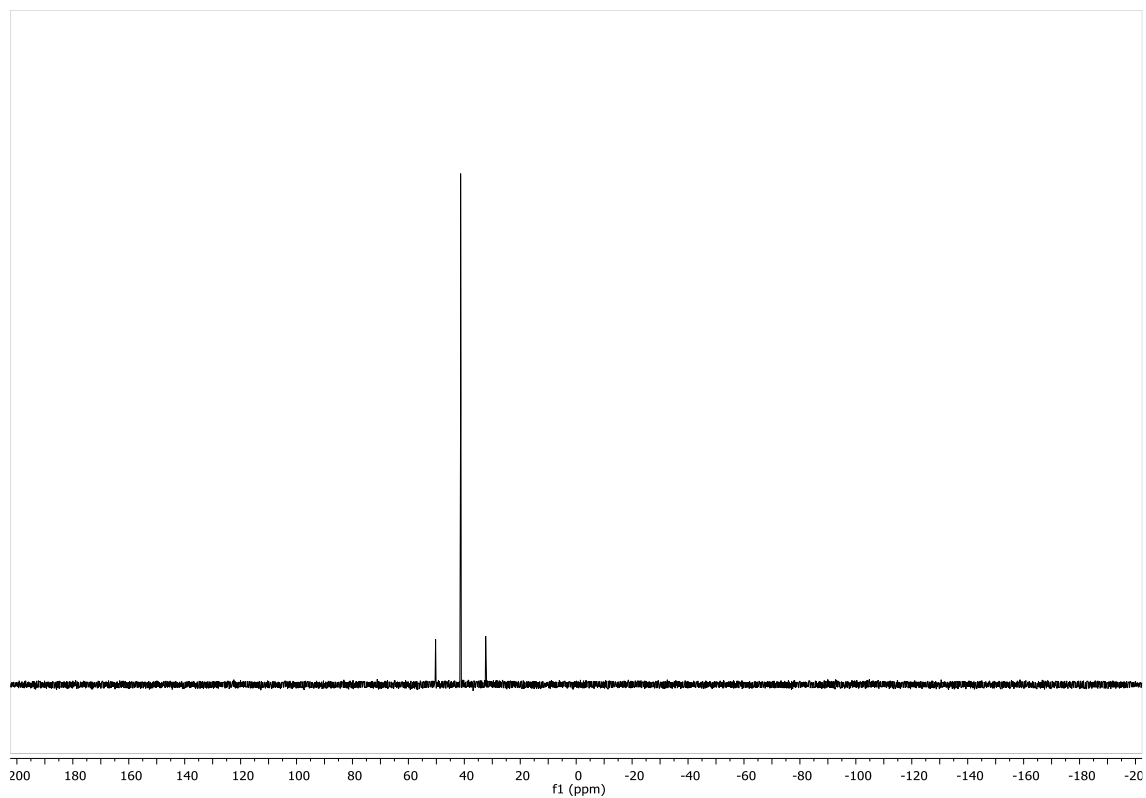

**Figure S37.**  $^{31}\text{P}$  NMR spectrum of complex **20** in  $\text{DMSO-d}_6$ .

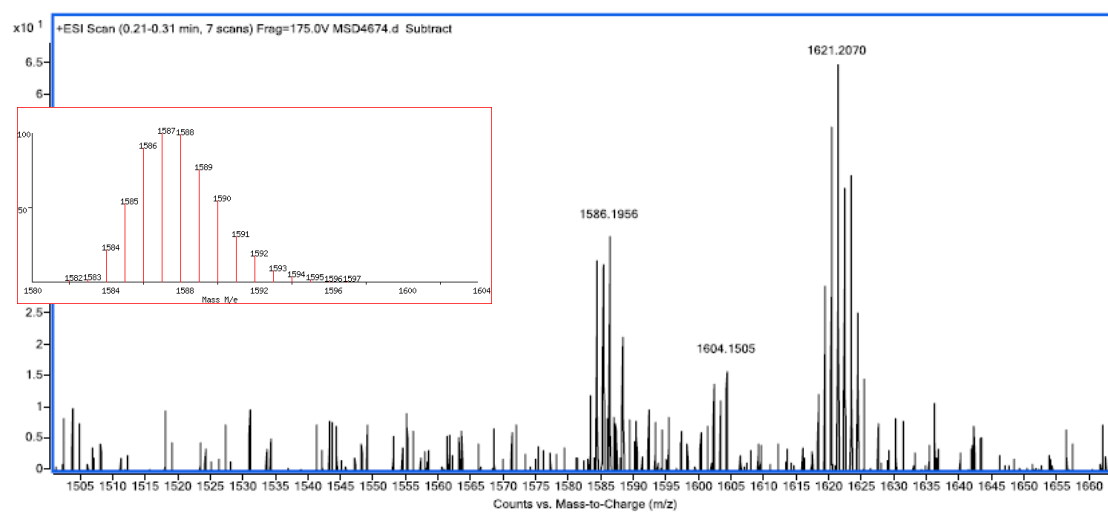

**Figure S38.** ESI-TOF(+) of complex **20**. Inset: calculated isotopic pattern.

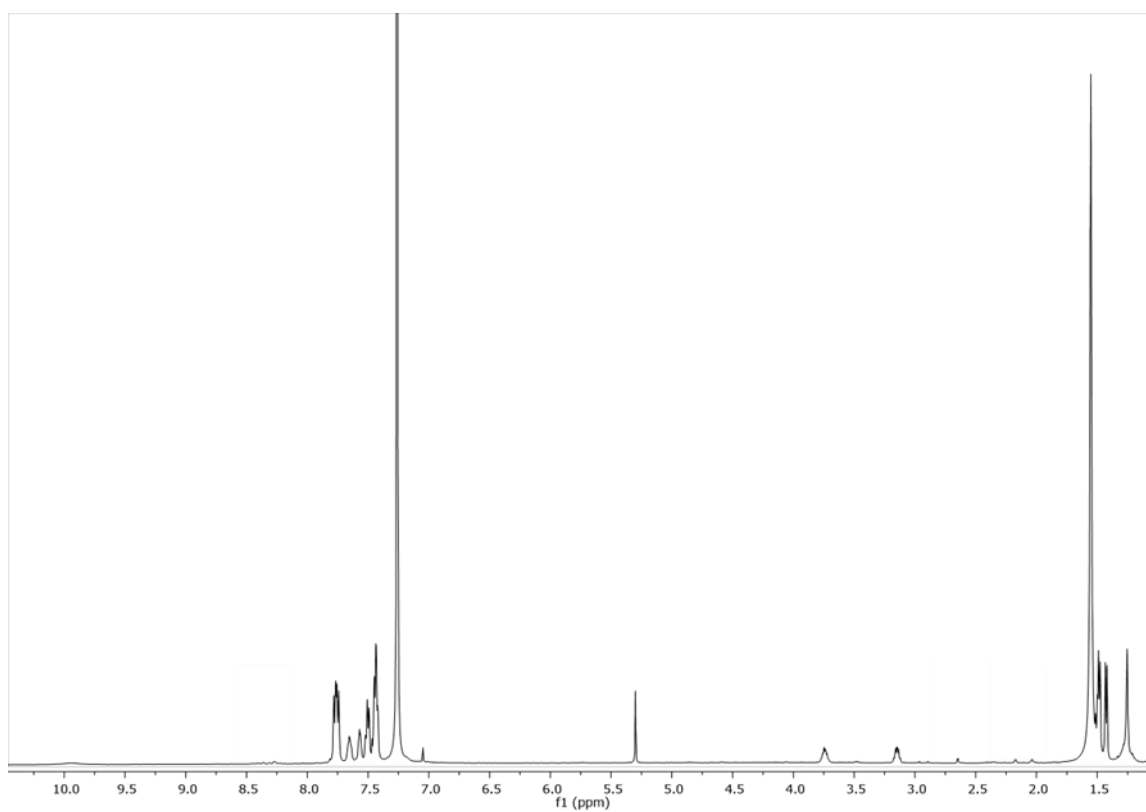

**Figure S39.** <sup>1</sup>H NMR spectrum of complex **21** in DMSO-d<sup>6</sup>.

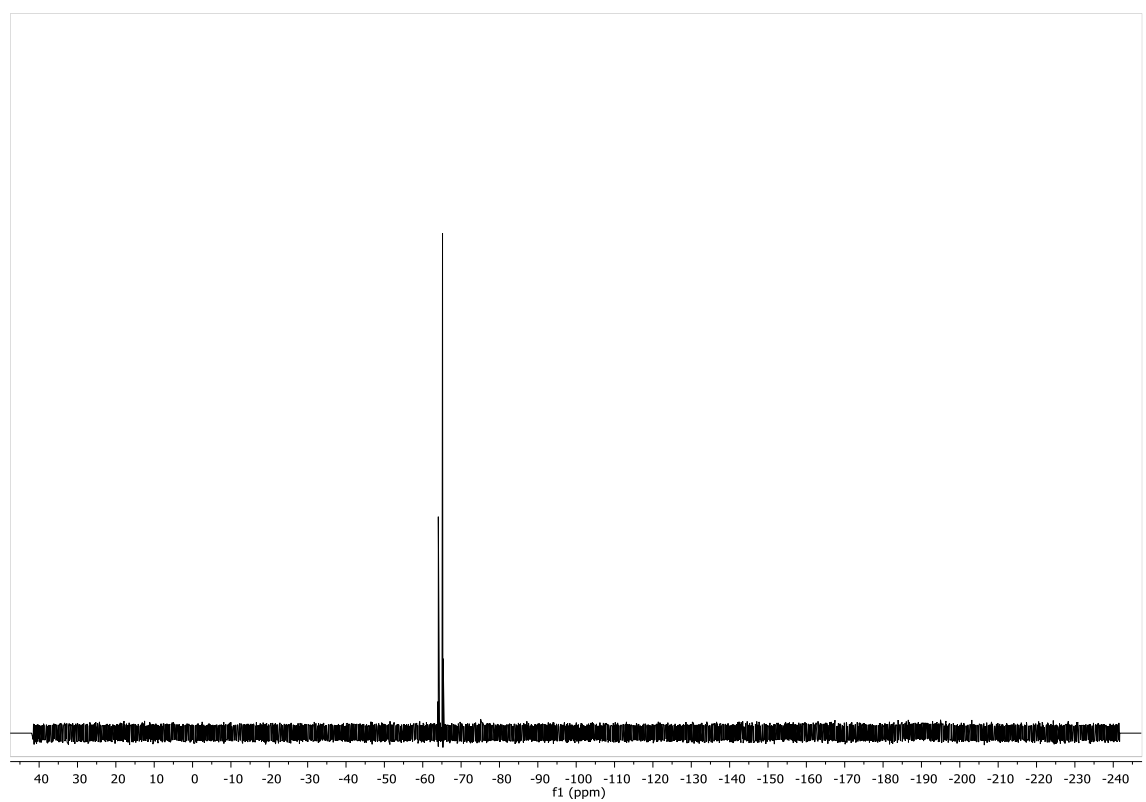

**Figure S40.** <sup>19</sup>F NMR spectrum of complex **21** in DMSO-d<sup>6</sup>.

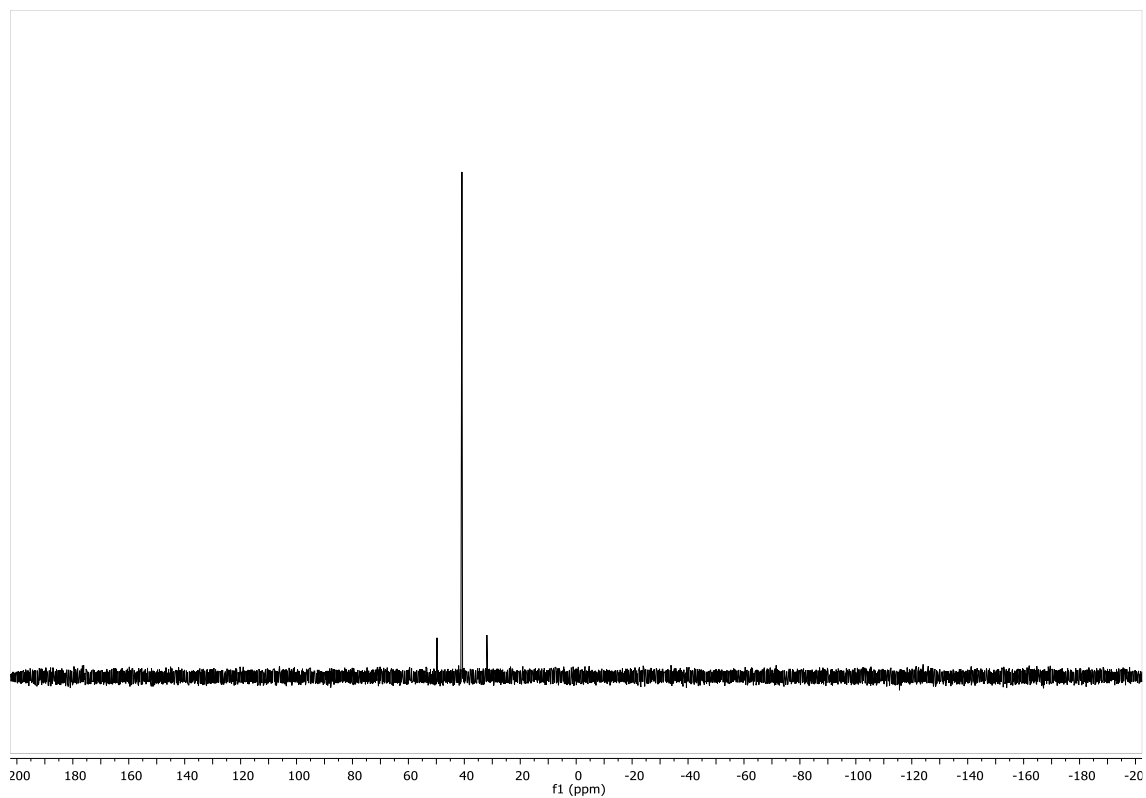

**Figure S41.**  $^{31}\text{P}$  NMR spectrum of complex **21** in  $\text{DMSO-d}_6$ .

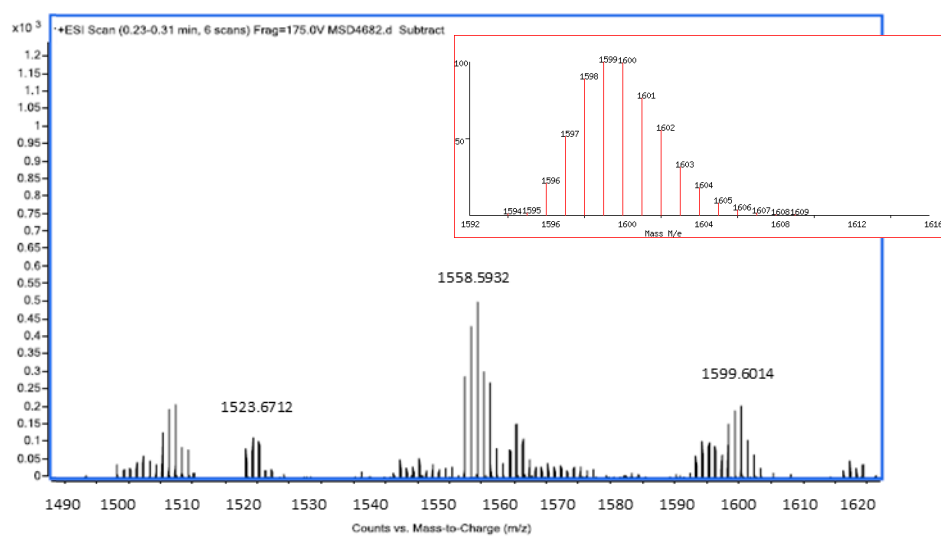

**Figure S42.** ESI-TOF(+) of complex **21**. Inset: calculated isotopic pattern.

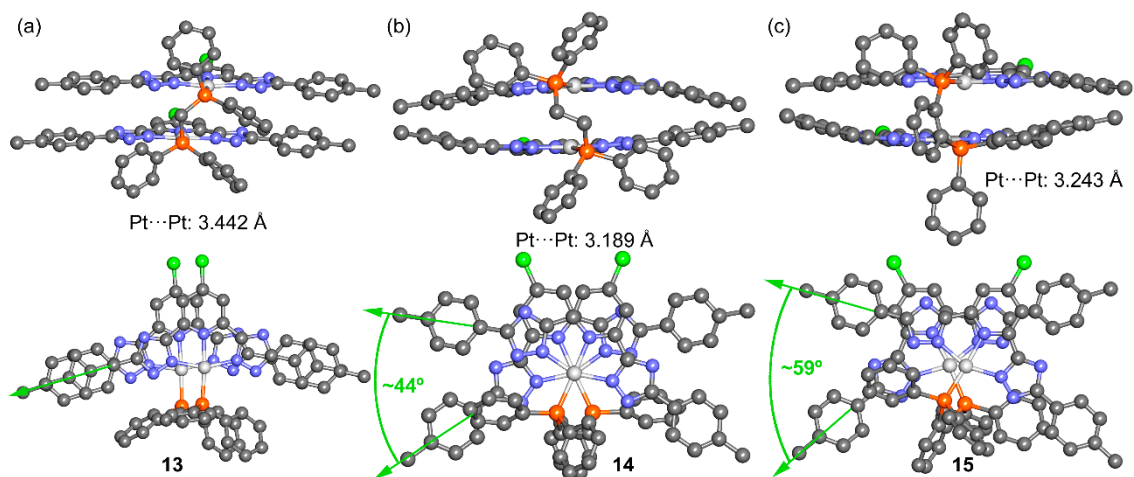

**Figure S43.** Ball and stick representation of the minimum energy geometries using two orientations calculated for compounds **13-15** at the RI-BP86-D3/def2-TZVP level of theory. The Pt···Pt distance is also indicated.

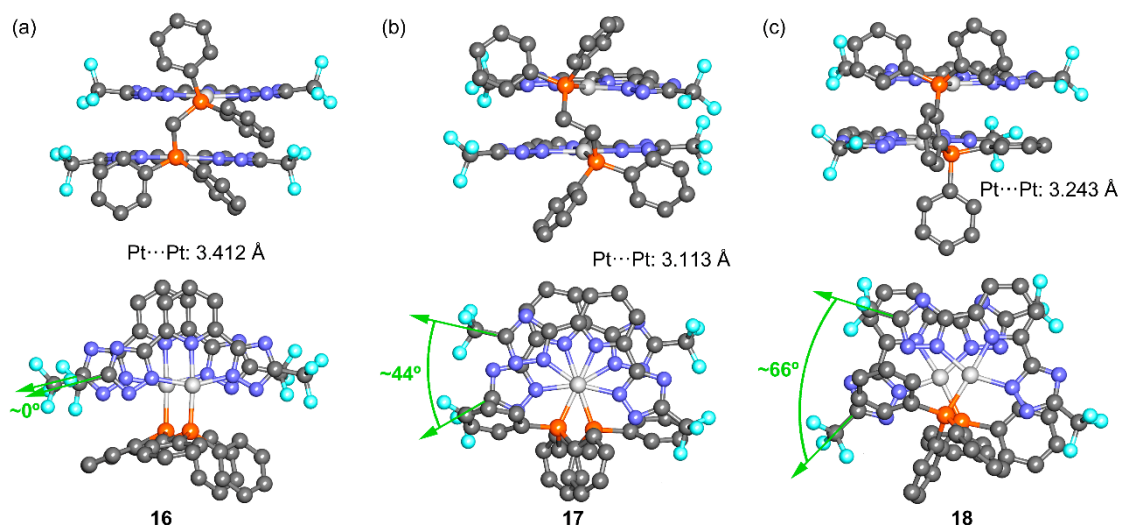

**Figure S44.** Ball and stick representation of the minimum energy geometries using two orientations calculated for compounds **16-18** at the RI-BP86-D3/def2-TZVP level of theory. The Pt···Pt distance is also indicated.

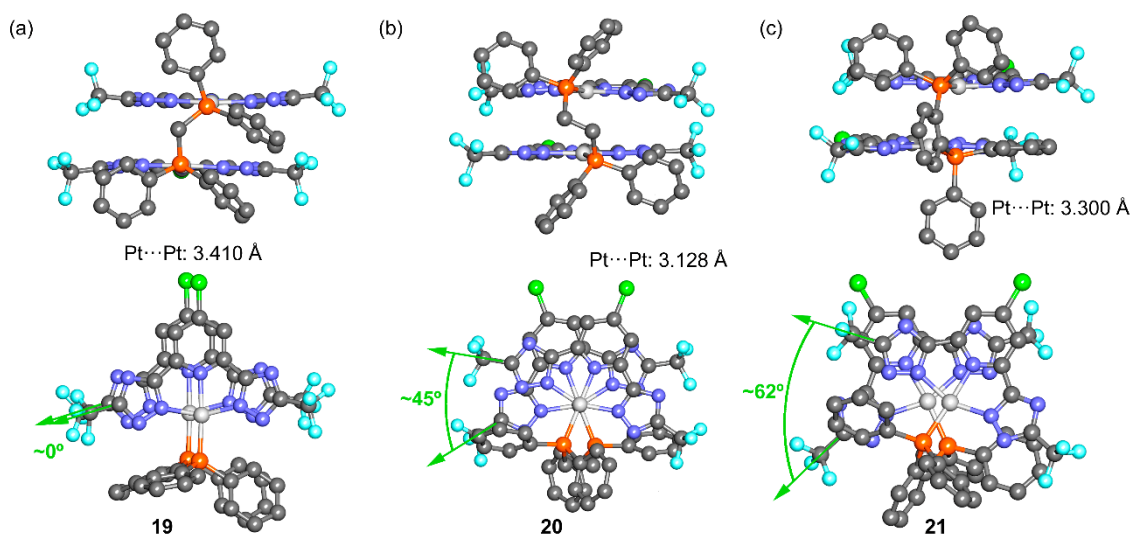

**Figure S45.** Ball and stick representation of the minimum energy geometries using two orientations calculated for compounds **19-21** at the RI-BP86-D3/def2-TZVP level of theory. The Pt...Pt distance is also indicated.

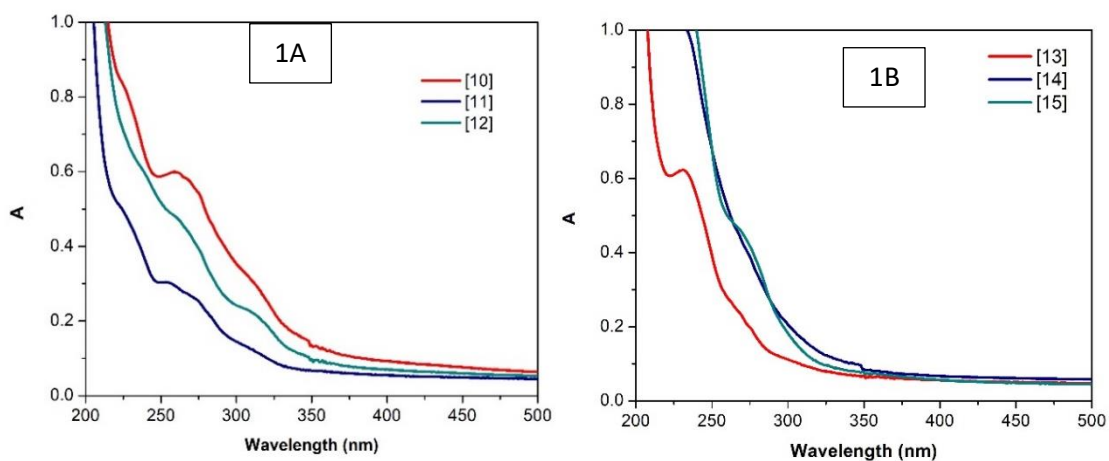

**Figure S46.** Absorption spectra of  $10^{-5}$  M acetonitrile air-equilibrated solutions of compounds **10-12** (1A) and **13-15** (1B).



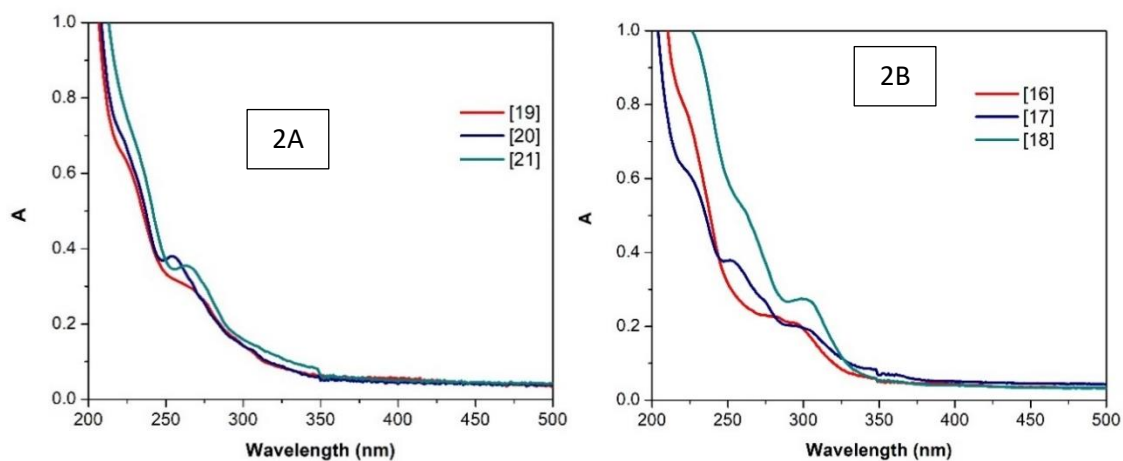

**Figure S47.** Absorption spectra of  $10^{-5}$  M acetonitrile air-equilibrated solutions of compounds **16-18** (2A) and **19-21** (2B).

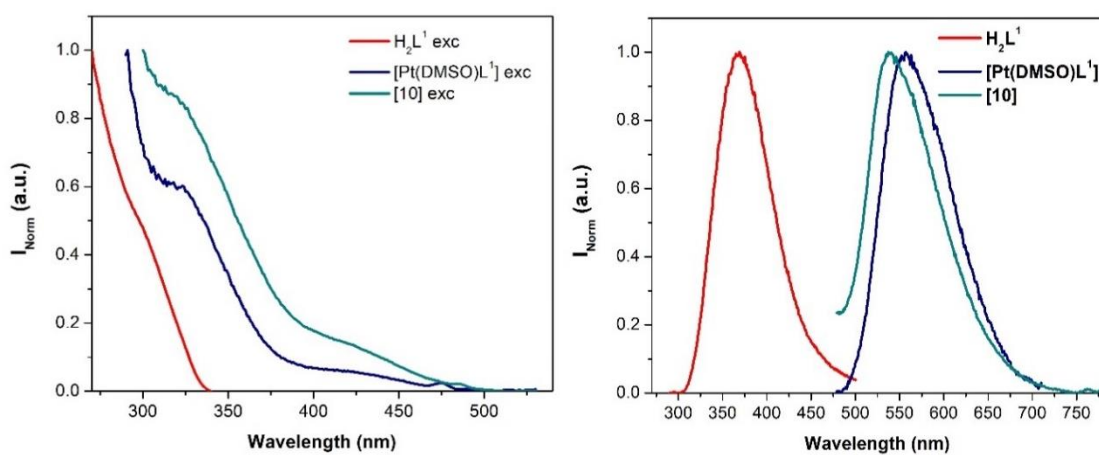

**Figure S48.** Normalized excitation (5A) and emission (5B) spectra of  $\text{H}_2\text{L}^1$ ,  $[\text{Pt}(\text{DMSO})\text{L}^1]$  and **10** compounds in acetonitrile  $10^{-5}$  M air-eq solutions ( $\lambda_{\text{exc}} = 280$  and 400 nm respectively).

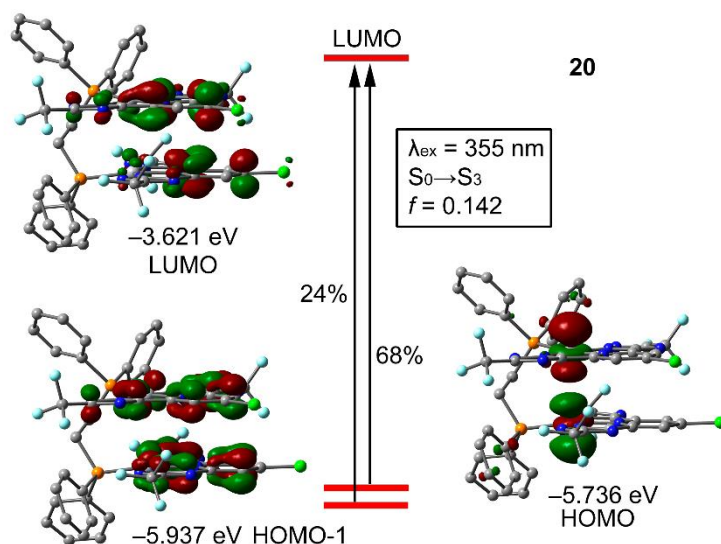

**Figure S49.** Representation of the MOs involved in the  $S_0 \rightarrow S_3$  excitation of compound **20**, with indication of the theoretical  $\lambda_{\text{exc}}$ , oscillator strength and relative contribution of each transition.

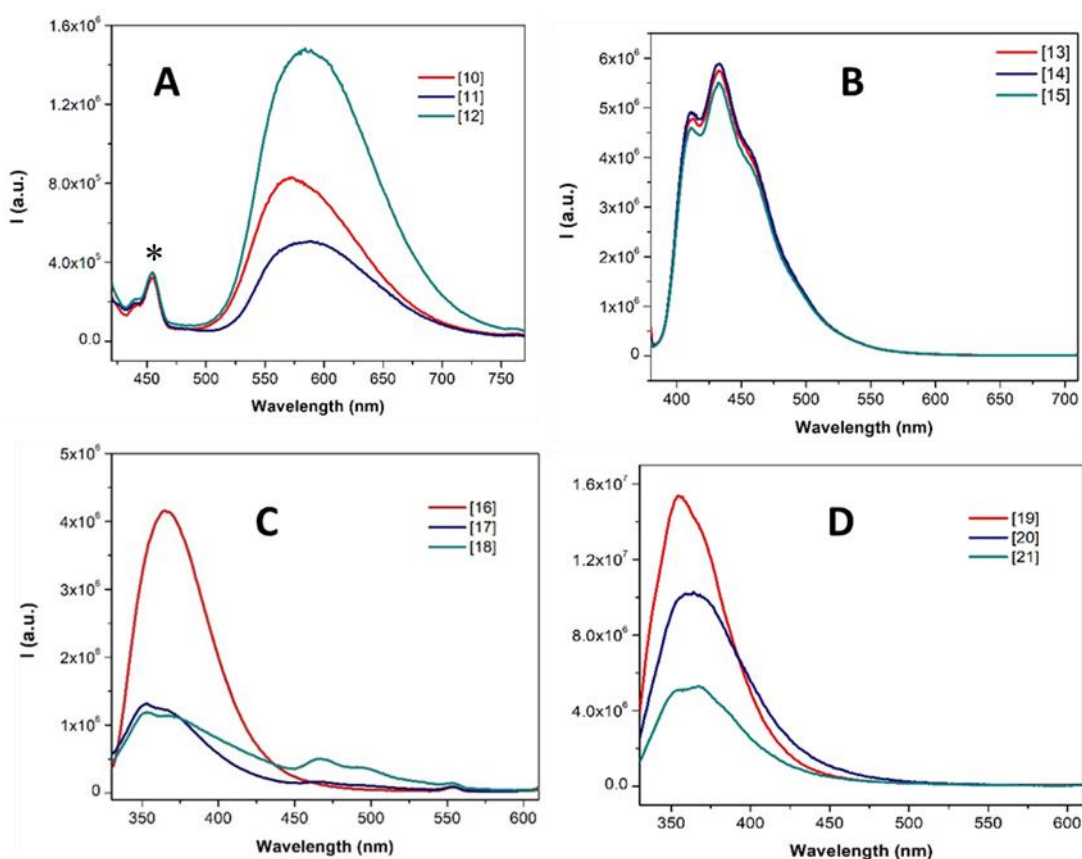

**Figure S50.** Emission spectra of the compounds in air-equilibrated  $1 \cdot 10^{-5} \text{ M}$  acetonitrile solutions. \* Indicates residual of the Raman band.

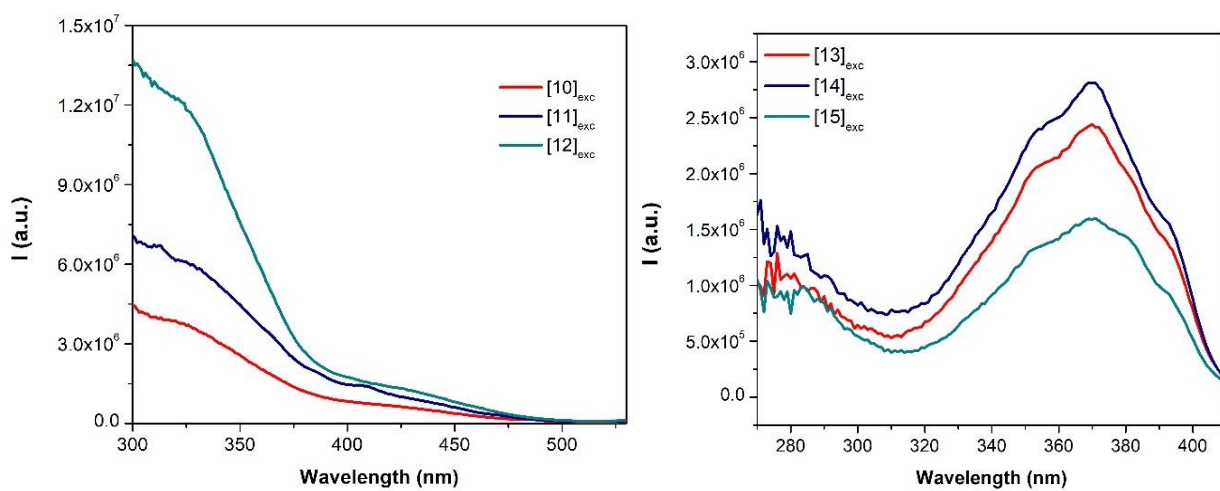

**Figure S51.** Excitation spectra of compounds **10-15** collected at the emission maxima.

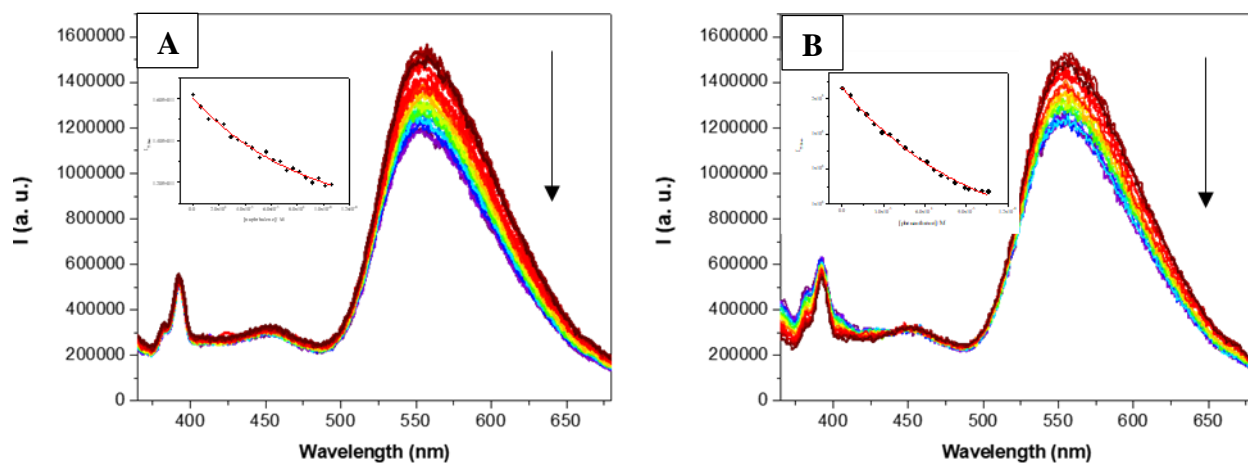

**Figure S52.** Emission spectra of compound **11** in the presence of different amounts of anthracene (A) and phenanthrene (B) in acetonitrile at room temperature.  $\lambda_{\text{exc}} = 350$  nm.

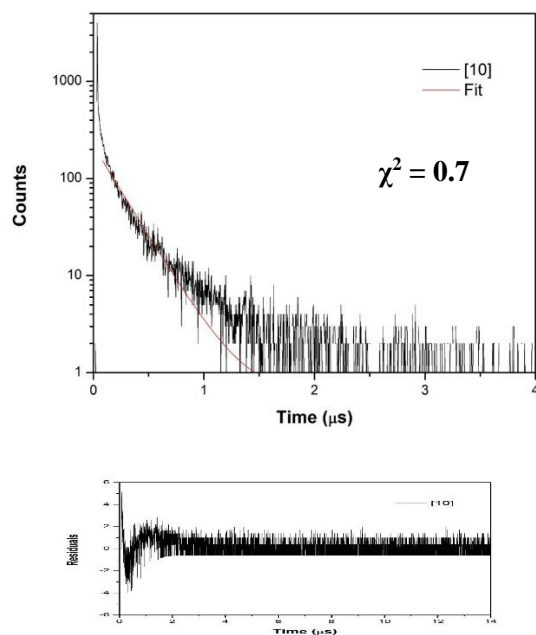

**Figure S53.** Phosphorescence lifetime and residuals of **10** in acetonitrile solution.

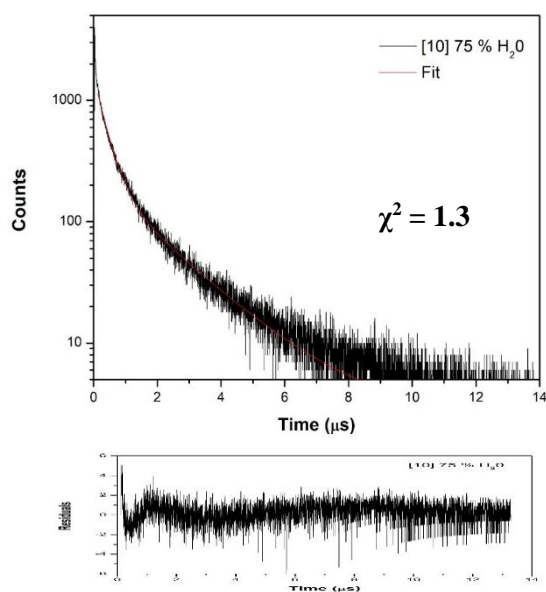

**Figure S54.** Phosphorescence lifetime and residuals of **10** in 25/75% acetonitrile/water solution.

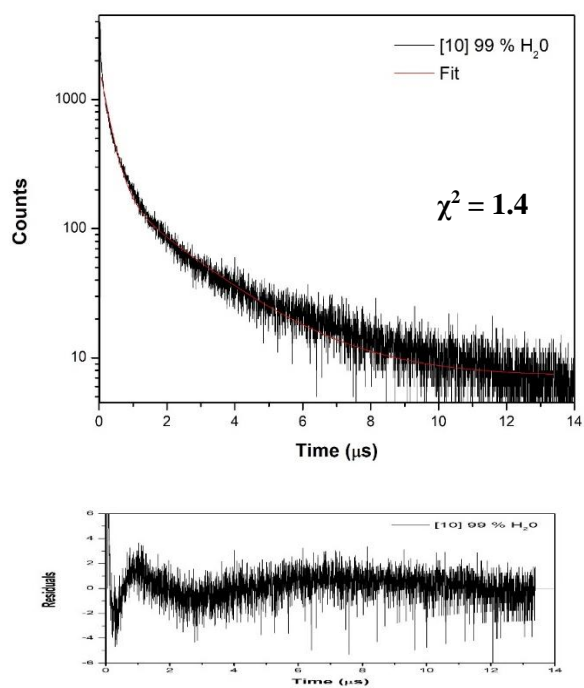

**Figure S55.** Phosphorescence lifetime and residuals of **10** in 1/99% acetonitrile/water solution.

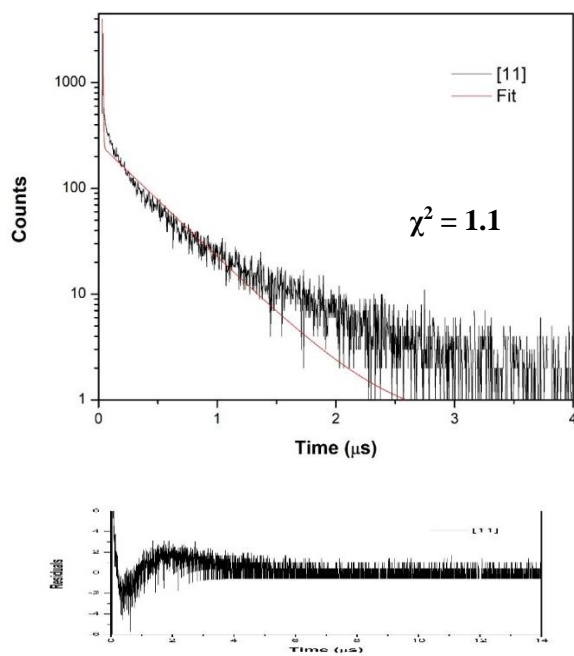

**Figure S56.** Phosphorescence lifetime and residuals of **11** in acetonitrile solution.

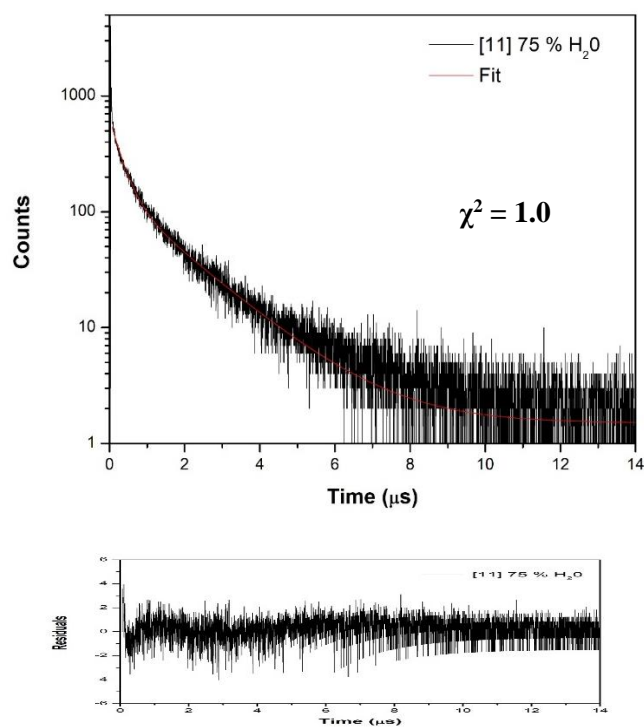

**Figure S57.** Phosphorescence lifetime and residuals of **11** in 25/75% acetonitrile/water solution.

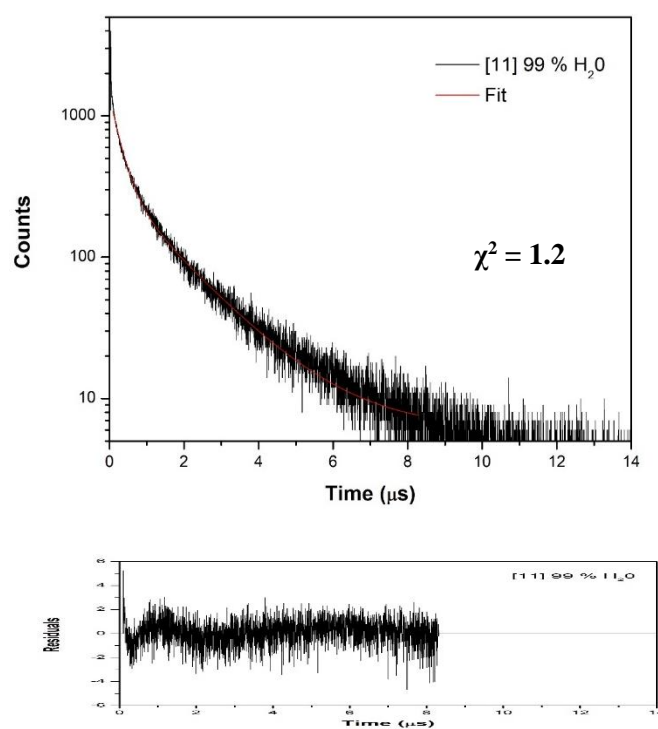

**Figure S58.** Phosphorescence lifetime and residuals of **11** in 1/99% acetonitrile/water solution.

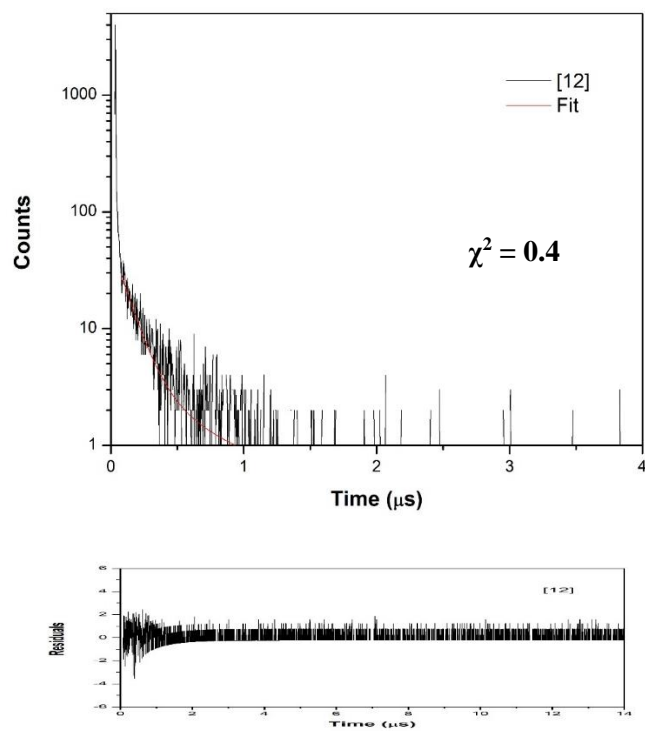

**Figure S59.** Phosphorescence lifetime and residuals of **12** in acetonitrile solution.

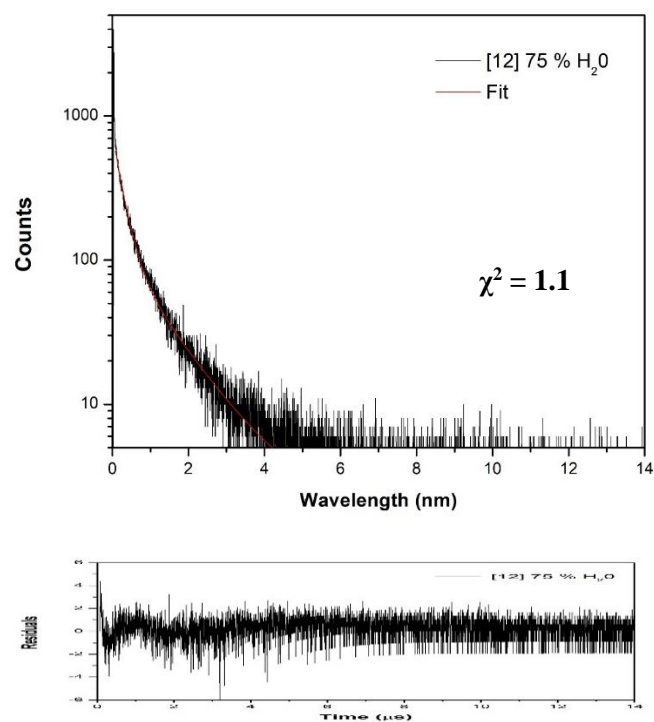

**Figure S60.** Phosphorescence lifetime and residuals of **12** in 25/75% acetonitrile/water solution.

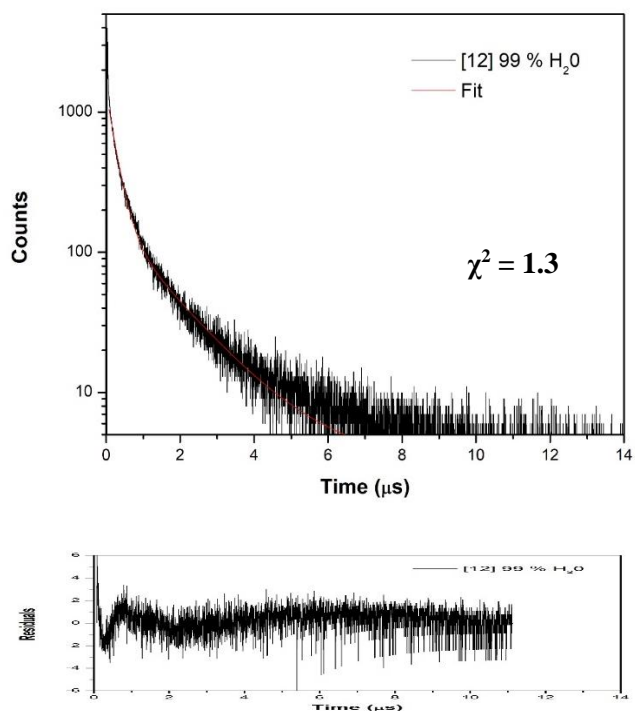

**Figure S61.** Phosphorescence lifetime and residuals of **12** in 1/99% acetonitrile/water solution.

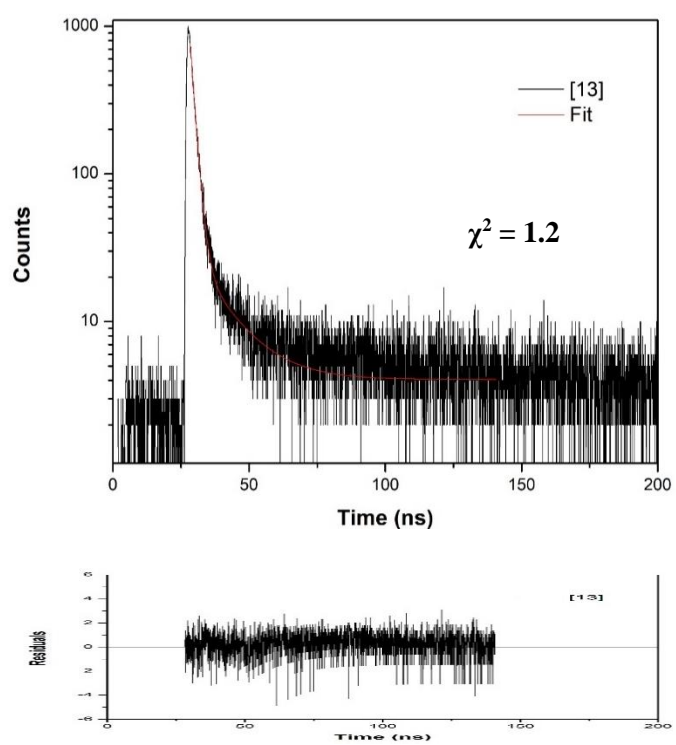

**Figure S62.** Fluorescence lifetime and residuals of **13** in acetonitrile solution.



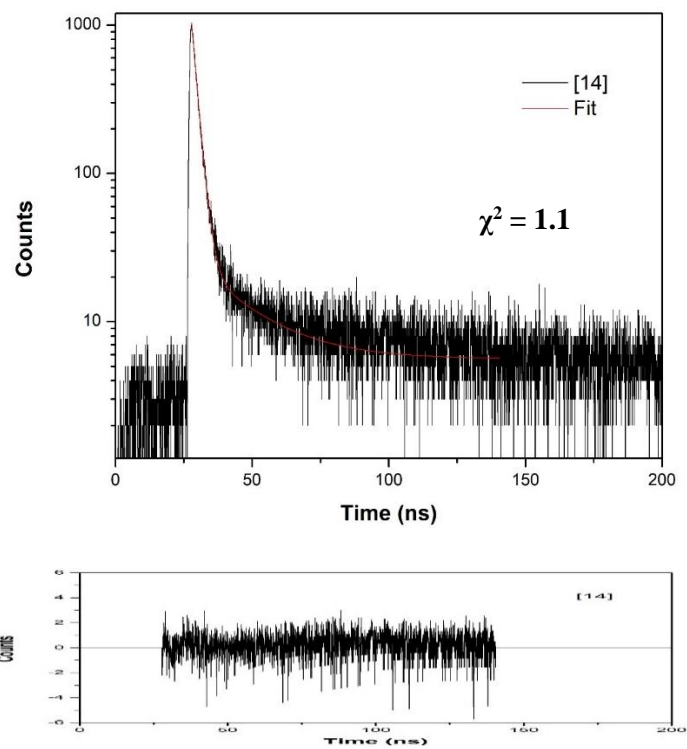

**Figure S63.** Fluorescence lifetime and residuals of **14** in acetonitrile solution.

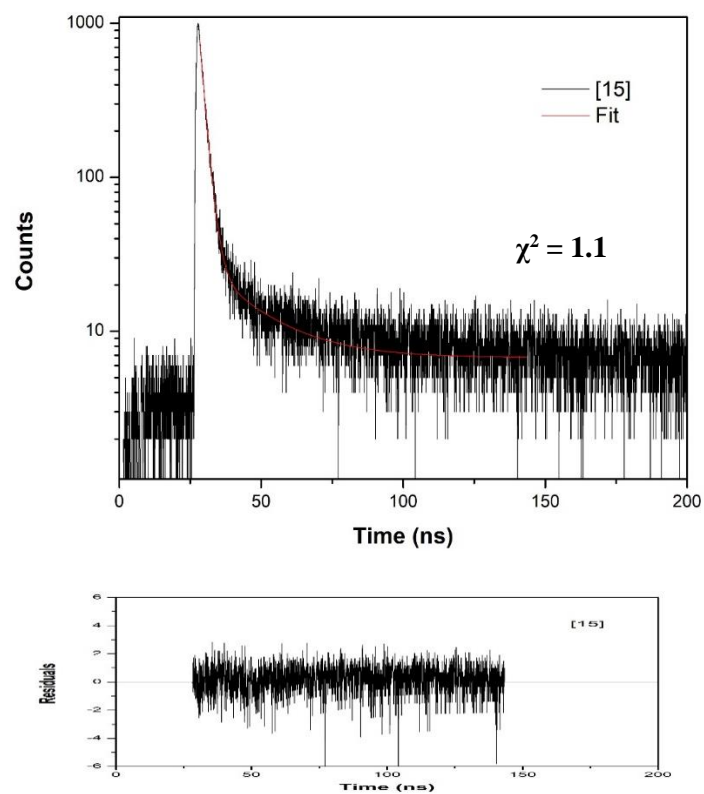

**Figure S64.** Fluorescence lifetime and residuals of **15** in acetonitrile solution.

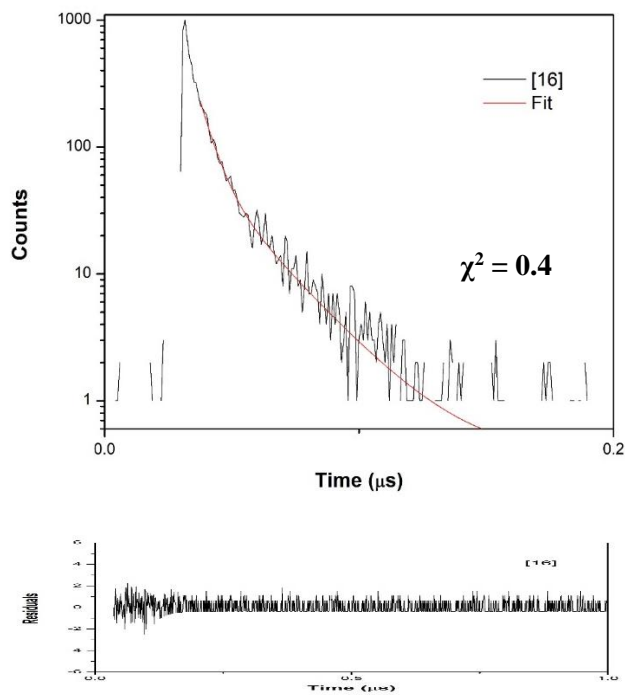

**Figure S65.** Phosphorescence lifetime and residuals of **16** in acetonitrile solution.

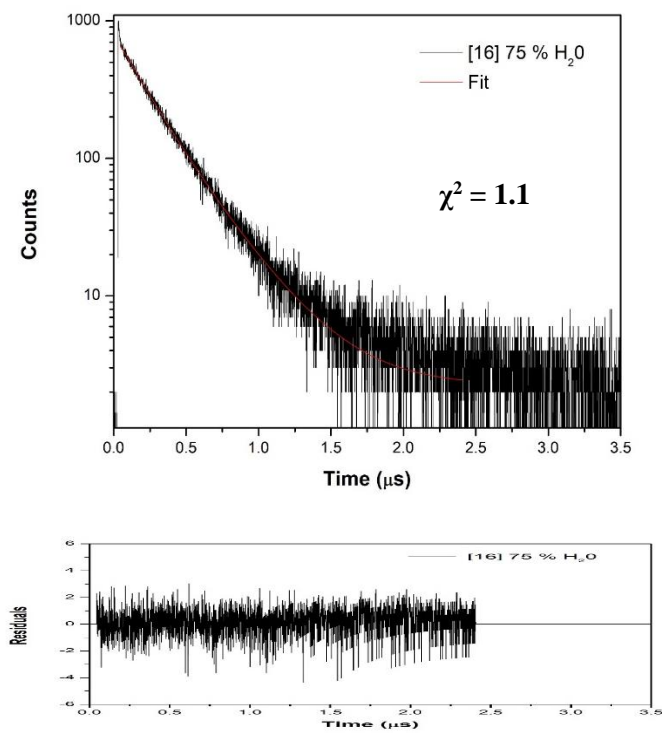

**Figure S66.** Phosphorescence lifetime and residuals of **16** in 25/75% acetonitrile/water solution.

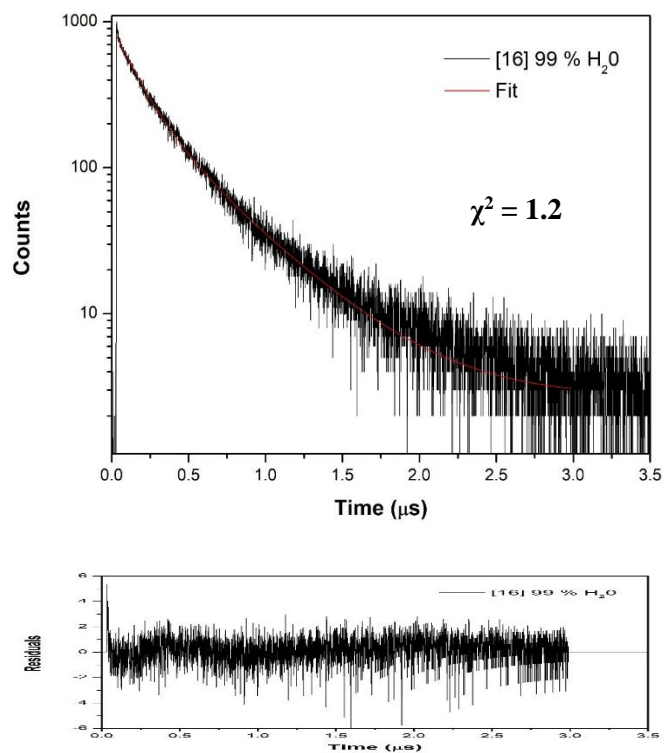

**Figure S67.** Phosphorescence lifetime and residuals of **16** in 1/99% acetonitrile/water solution.

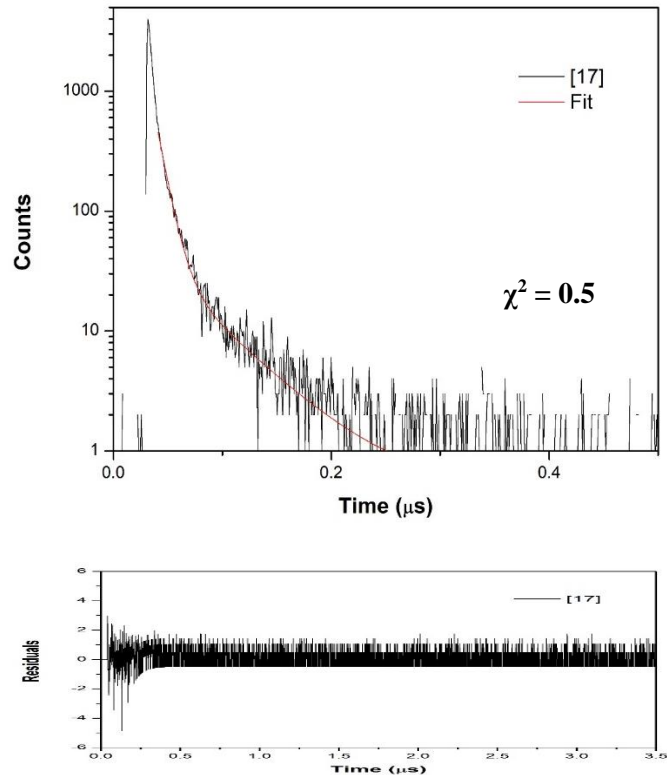

**Figure S68.** Phosphorescence lifetime and residuals of **17** in acetonitrile solution.

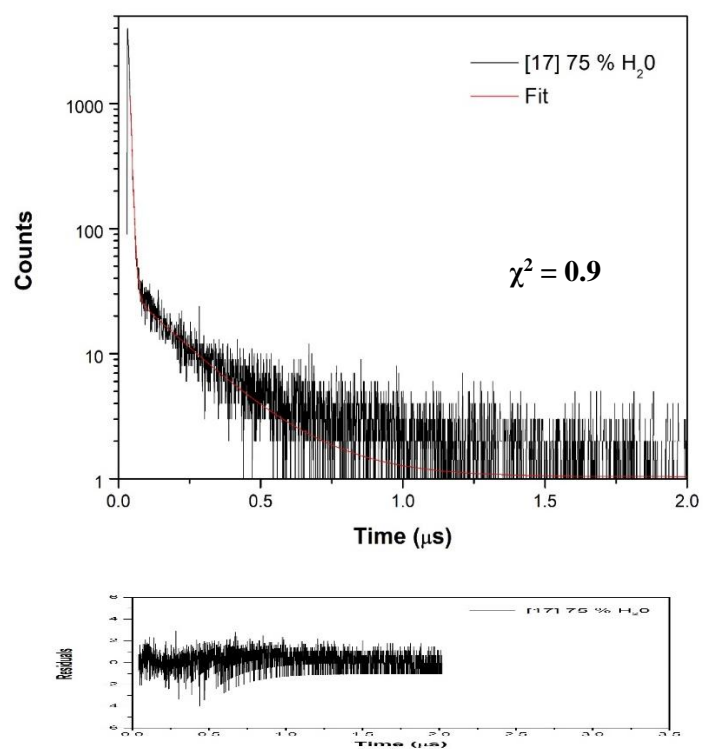

**Figure S69.** Phosphorescence lifetime and residuals of **17** in 25/75% acetonitrile/water solution.

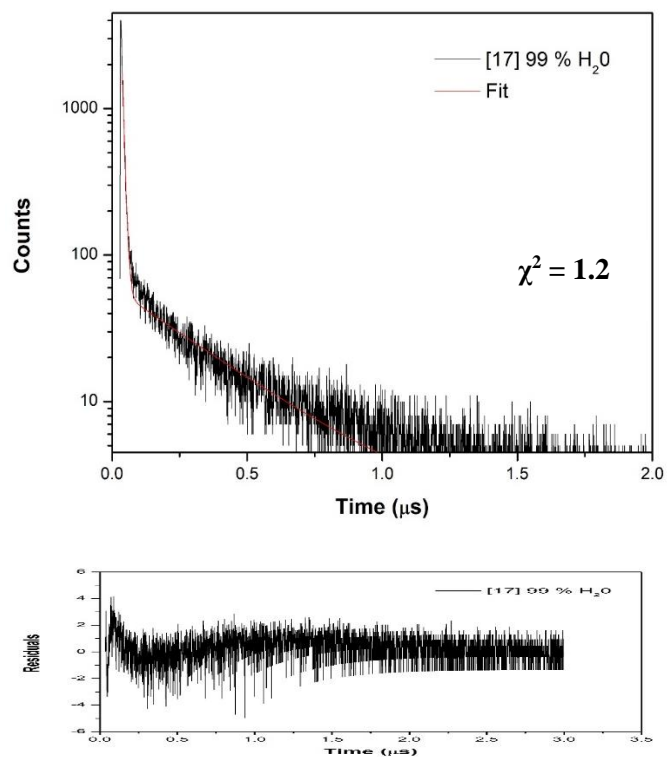

**Figure S70.** Phosphorescence lifetime and residuals of **17** in 1/99% acetonitrile/water solution.

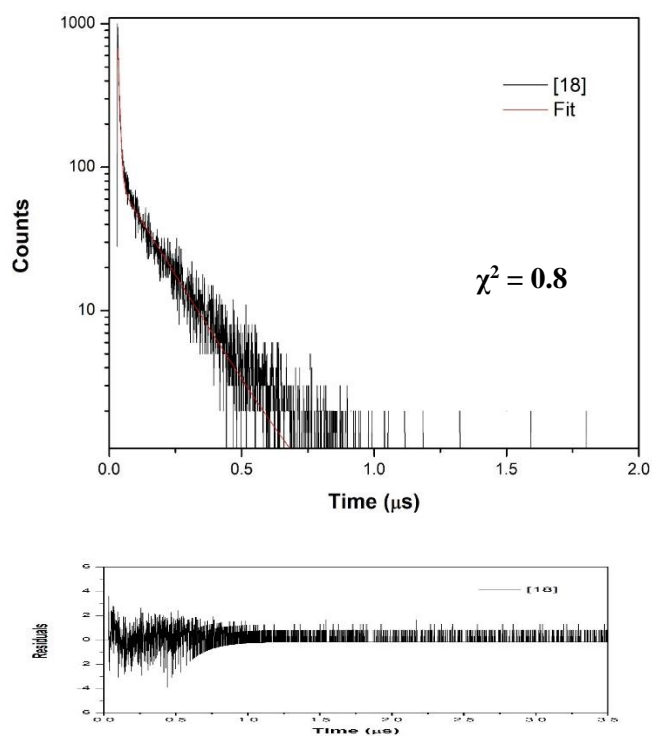

**Figure S71.** Phosphorescence lifetime and residuals of **18** in acetonitrile solution.

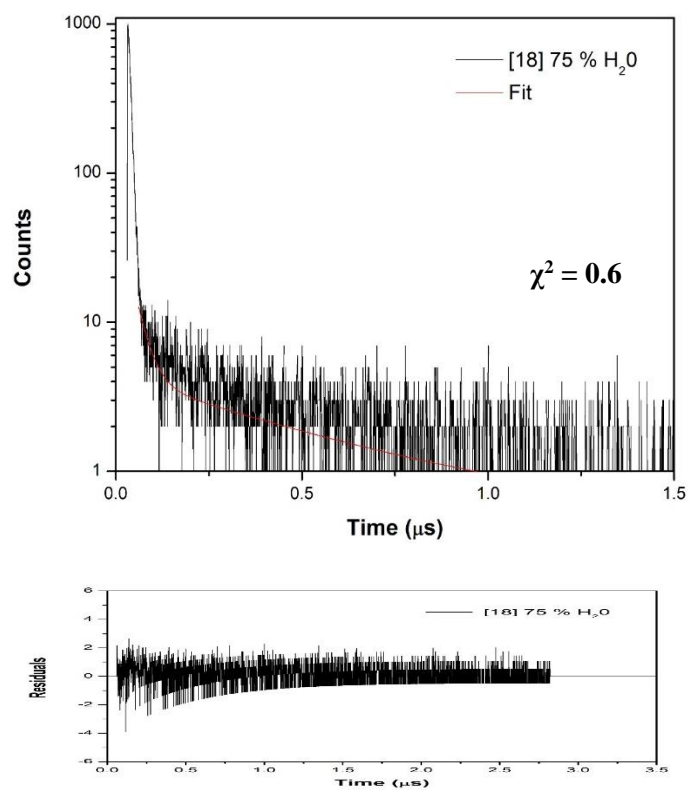

**Figure S72.** Phosphorescence lifetime and residuals of **18** in 25/75% acetonitrile/water solution.

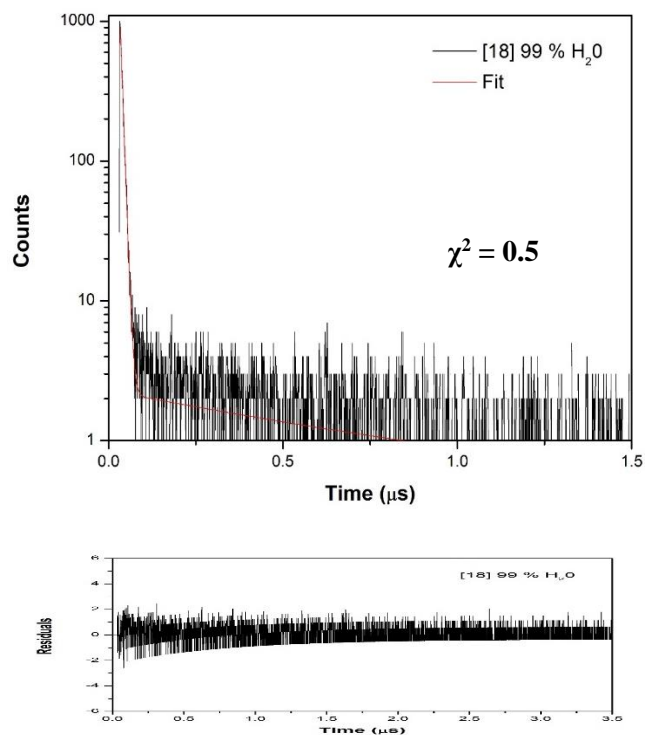

**Figure S73.** Phosphorescence lifetime and residuals of **18** in 1/99% acetonitrile/water solution.

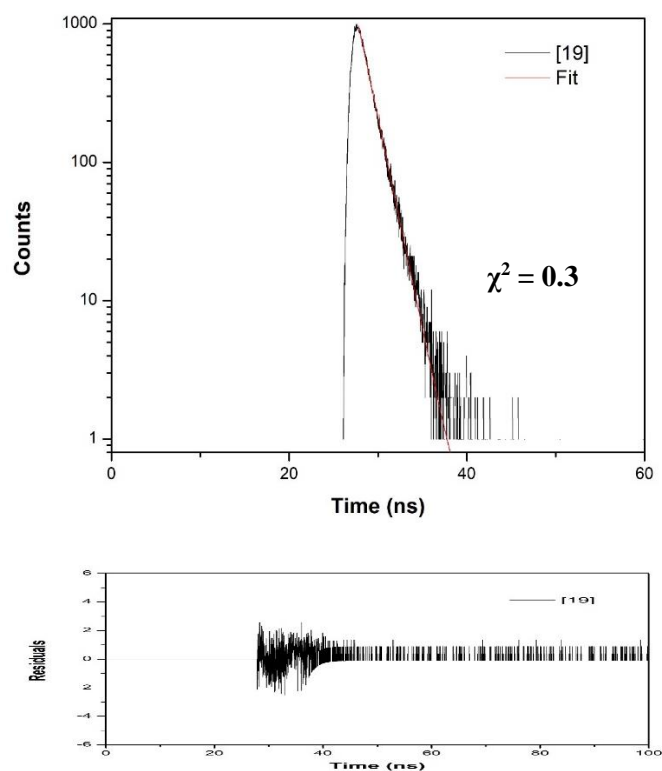

**Figure S74.** Fluorescence lifetime and residuals of **19** in acetonitrile solution.

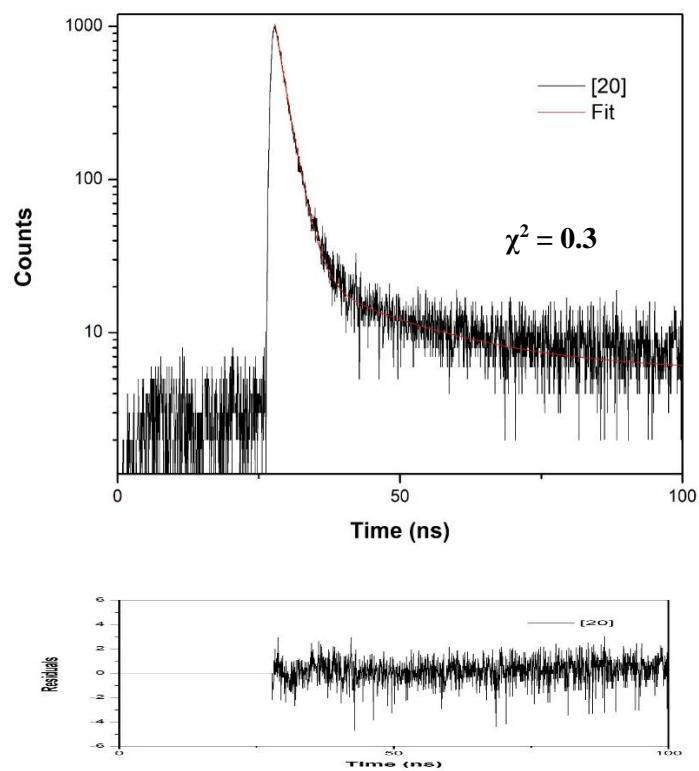

**Figure S75.** Fluorescence lifetime and residuals of **20** in acetonitrile solution.

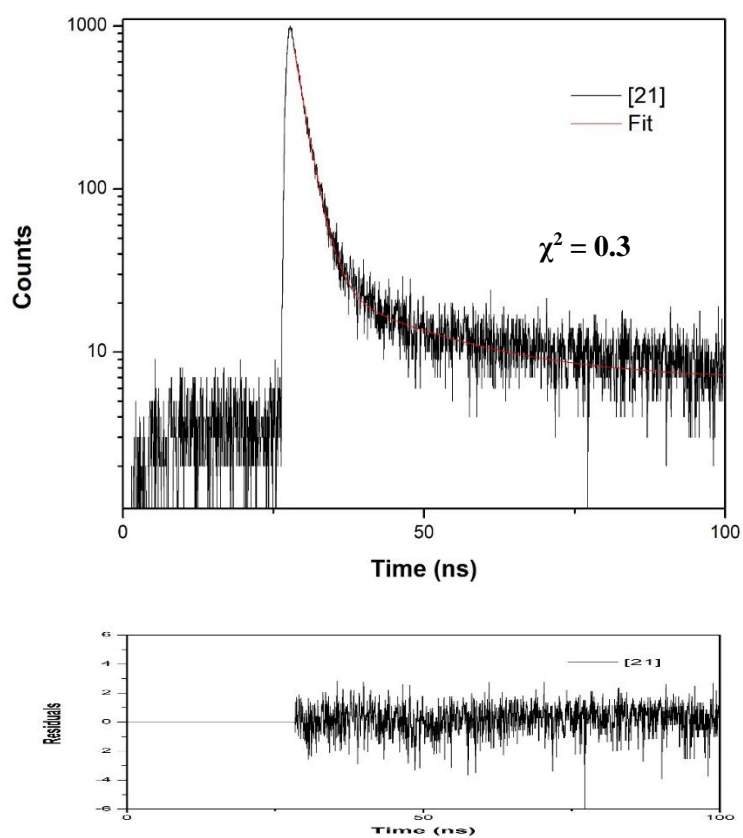

**Figure S76.** Fluorescence lifetime and residuals of **21** in acetonitrile solution.

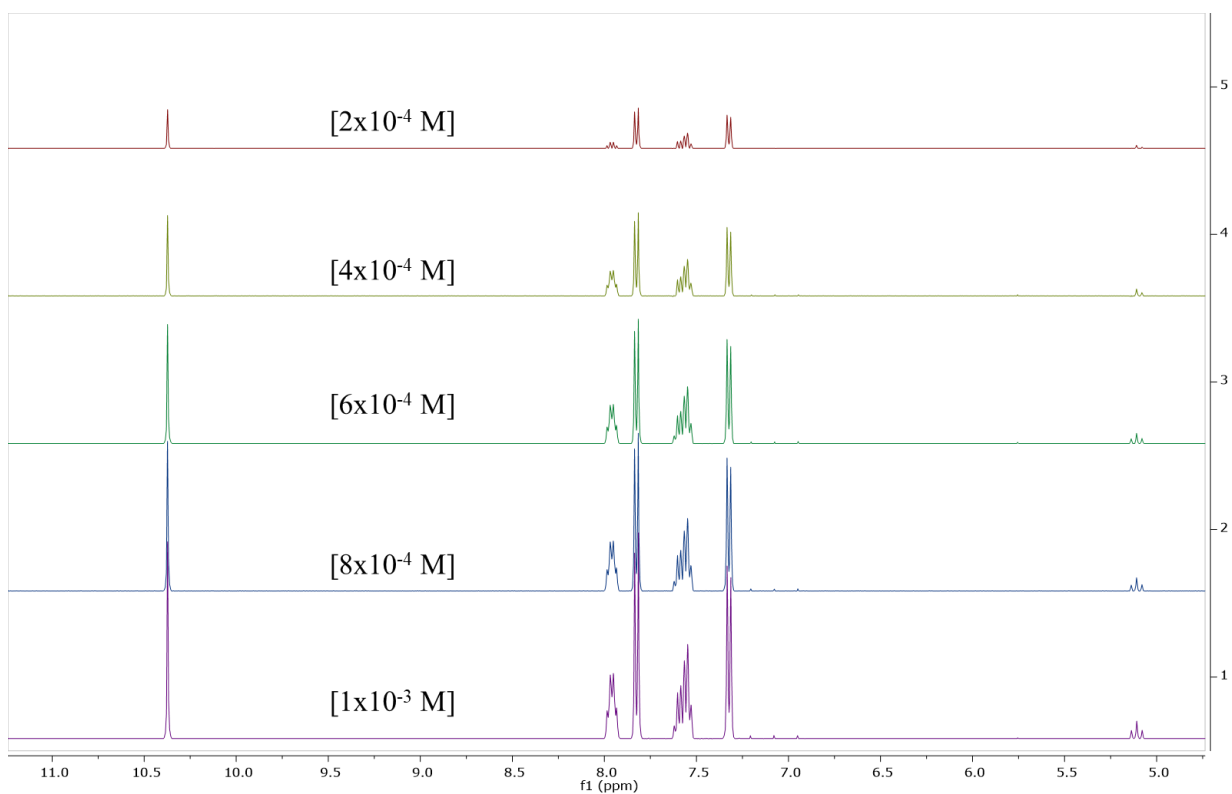

**Figure S77.**  $^1\text{H}$  NMR spectra of complex **13** in  $\text{DMSO-d}_6$  at different concentrations.

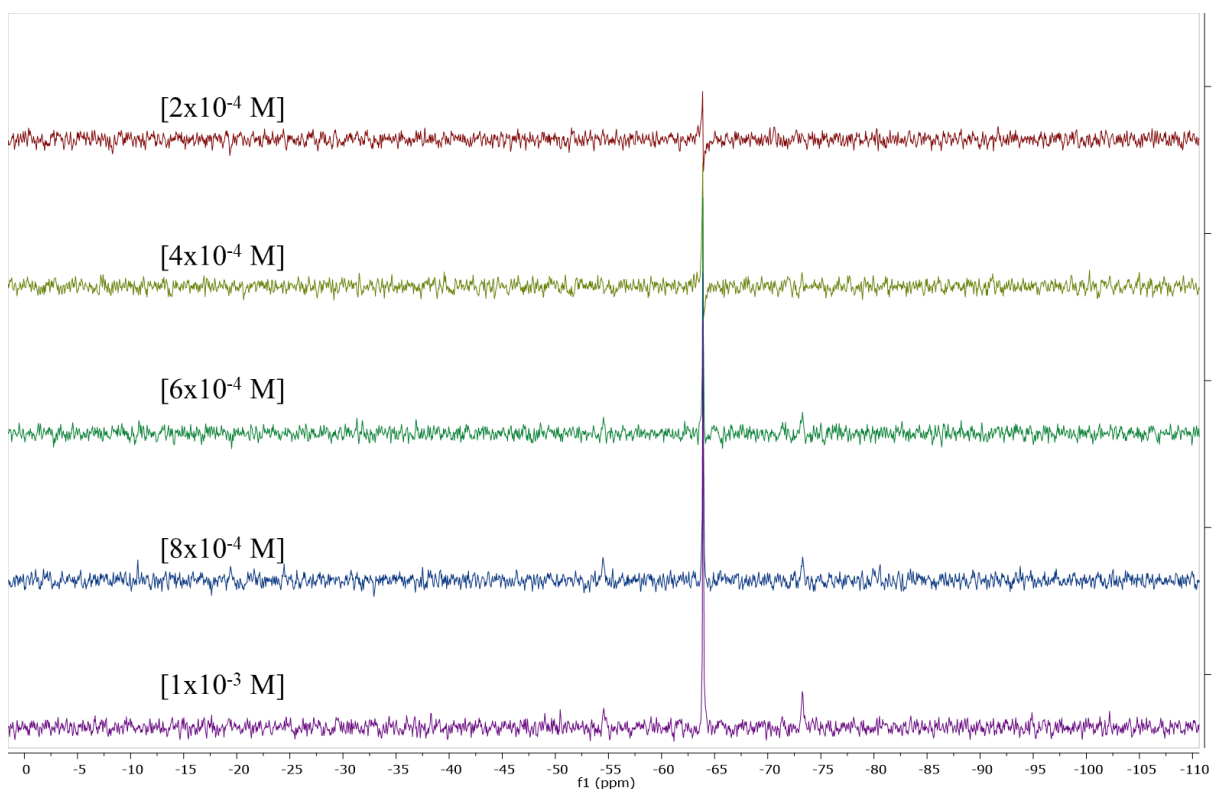

**Figure S78.**  $^{31}\text{P}\{^1\text{H}\}$  NMR spectra of complex **13** in  $\text{DMSO-d}_6$  at different concentrations.



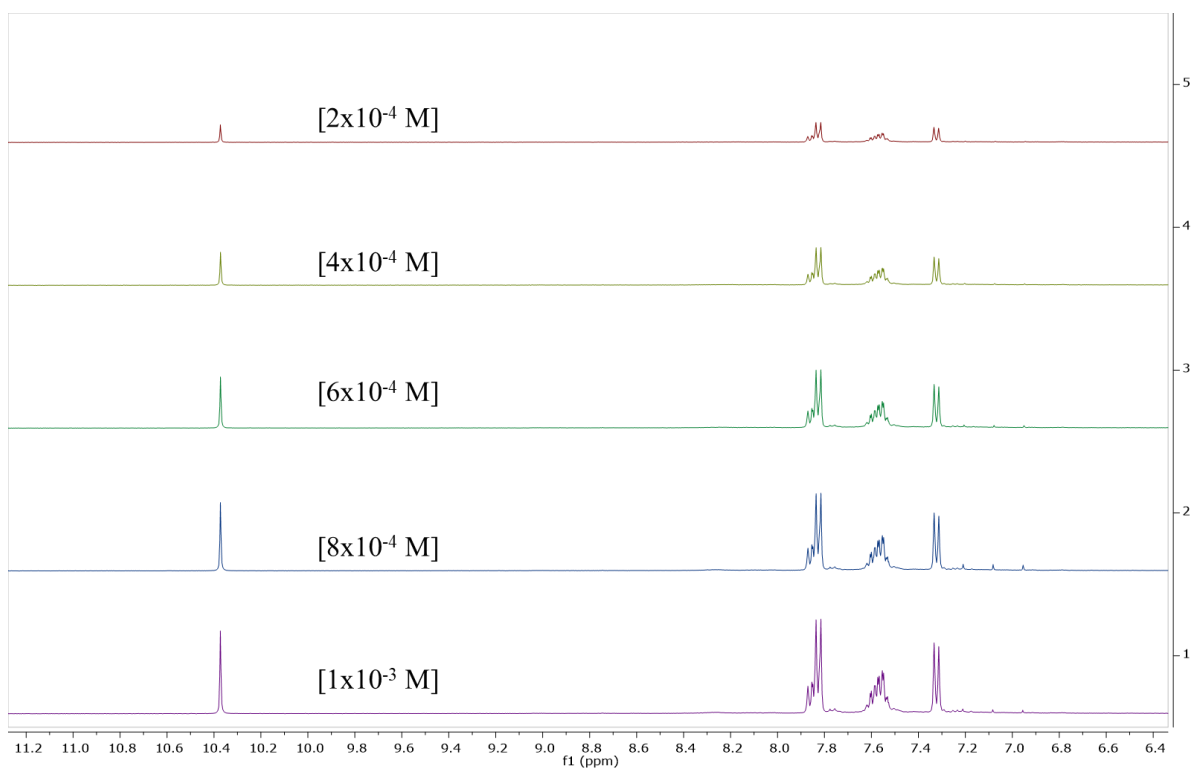

**Figure S79.**  $^1\text{H}$  NMR spectra of complex **14** in  $\text{DMSO-d}_6$  at different concentrations.

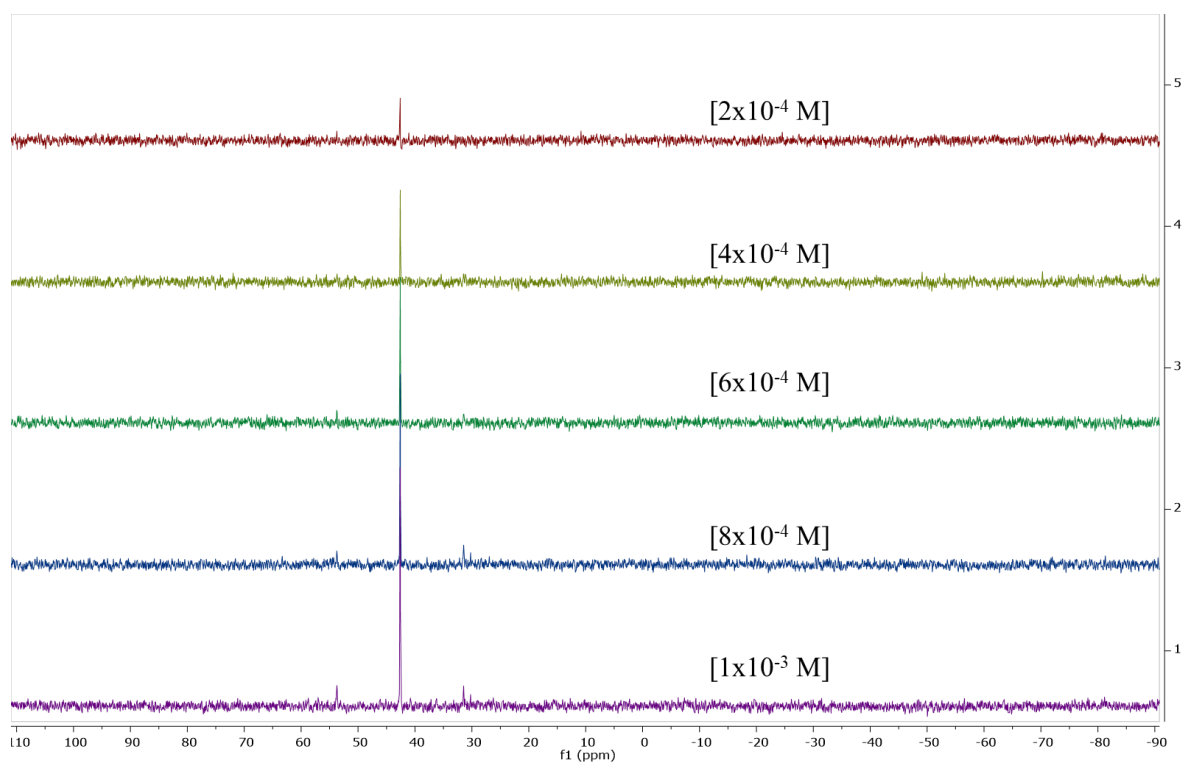

**Figure S80.**  $^{31}\text{P}\{^1\text{H}\}$  spectra of complex **14** in  $\text{DMSO-d}_6$  at different concentrations.

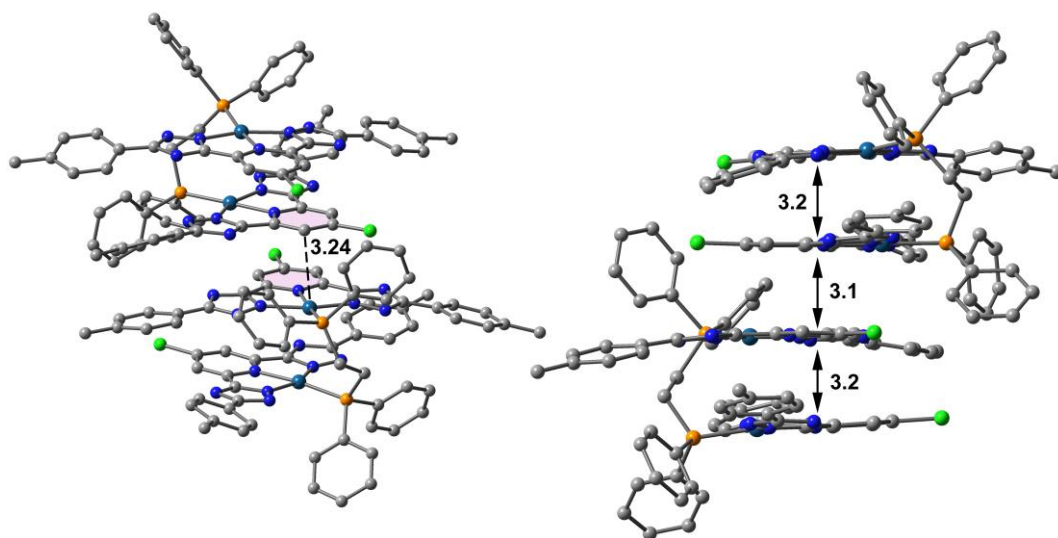

**Figure S81.** Calculated dimer assembly for compound **14**.

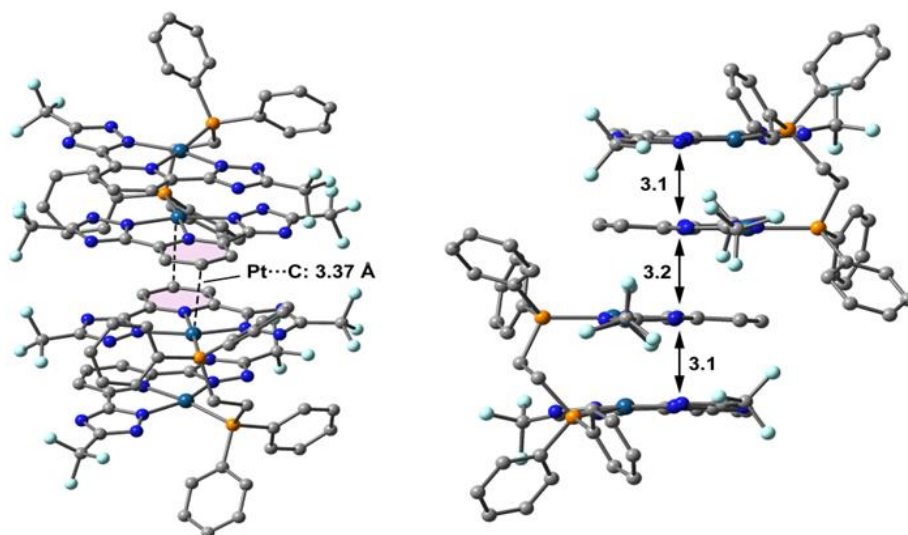

**Figure S82.** Calculated dimer assembly for compound **17**.

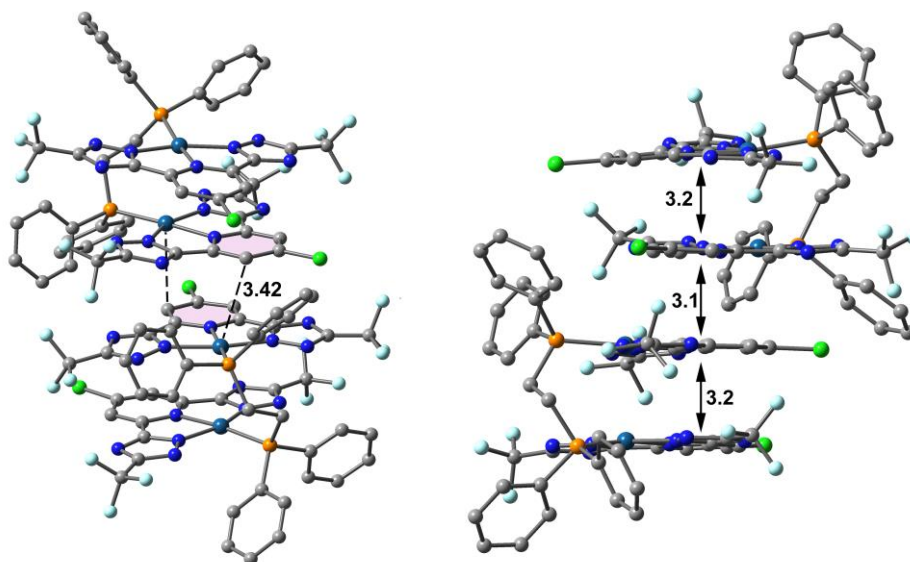

**Figure S83.** Calculated dimer assembly for compound **20**.

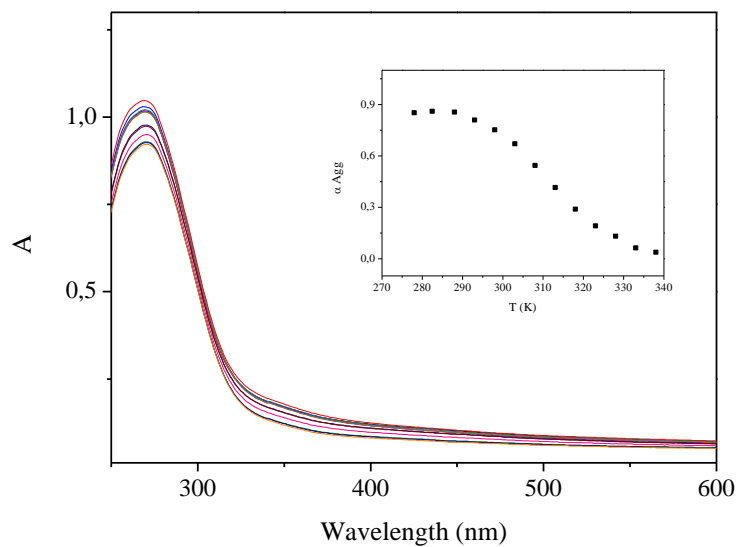

**Figure S84.** Absorption spectra of compound **11** recorded at different temperatures in acetonitrile. Inset: plot of the variation of the aggregation with temperature.

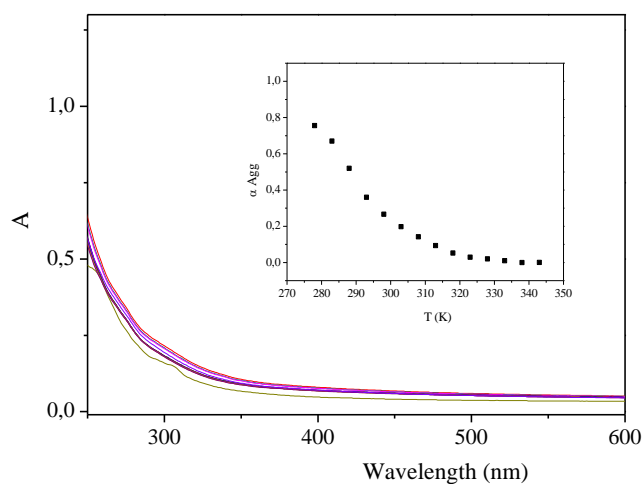

**Figure S85.** Absorption spectra of compound **14** recorded at different temperatures in acetonitrile. Inset: plot of the variation of the aggregation with temperature.

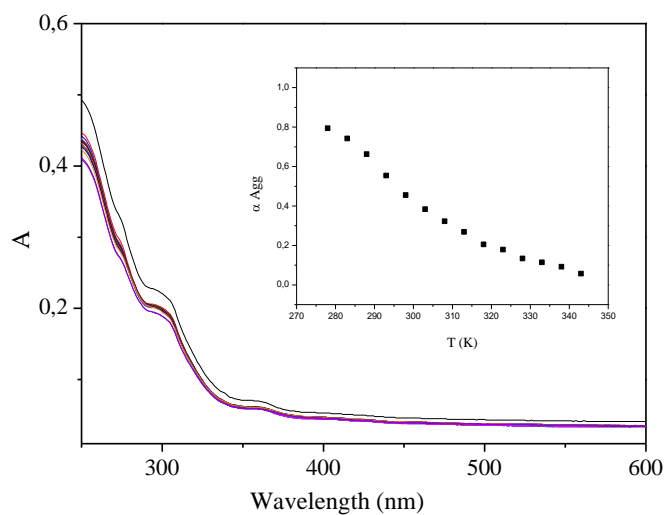

**Figure S86.** Absorption spectra of compound **17** recorded at different temperatures in acetonitrile. Inset: plot of the variation of the aggregation with temperature.

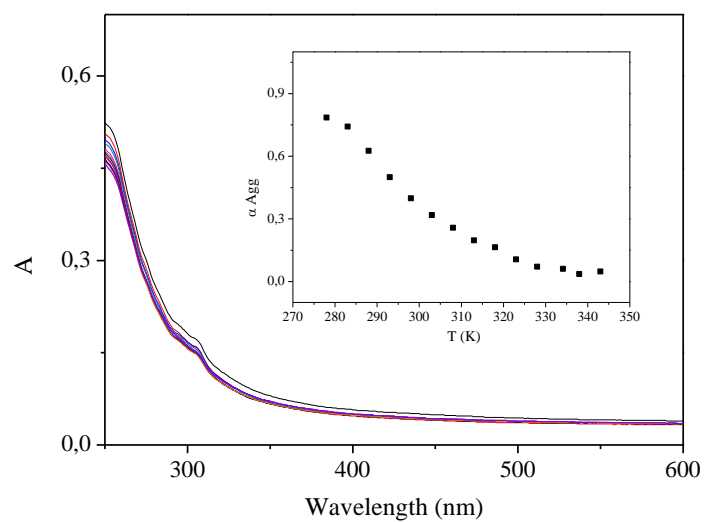

**Figure S87.** Absorption spectra of compound **20** recorded at different temperatures in acetonitrile. Inset: plot of the variation of the aggregation with temperature.

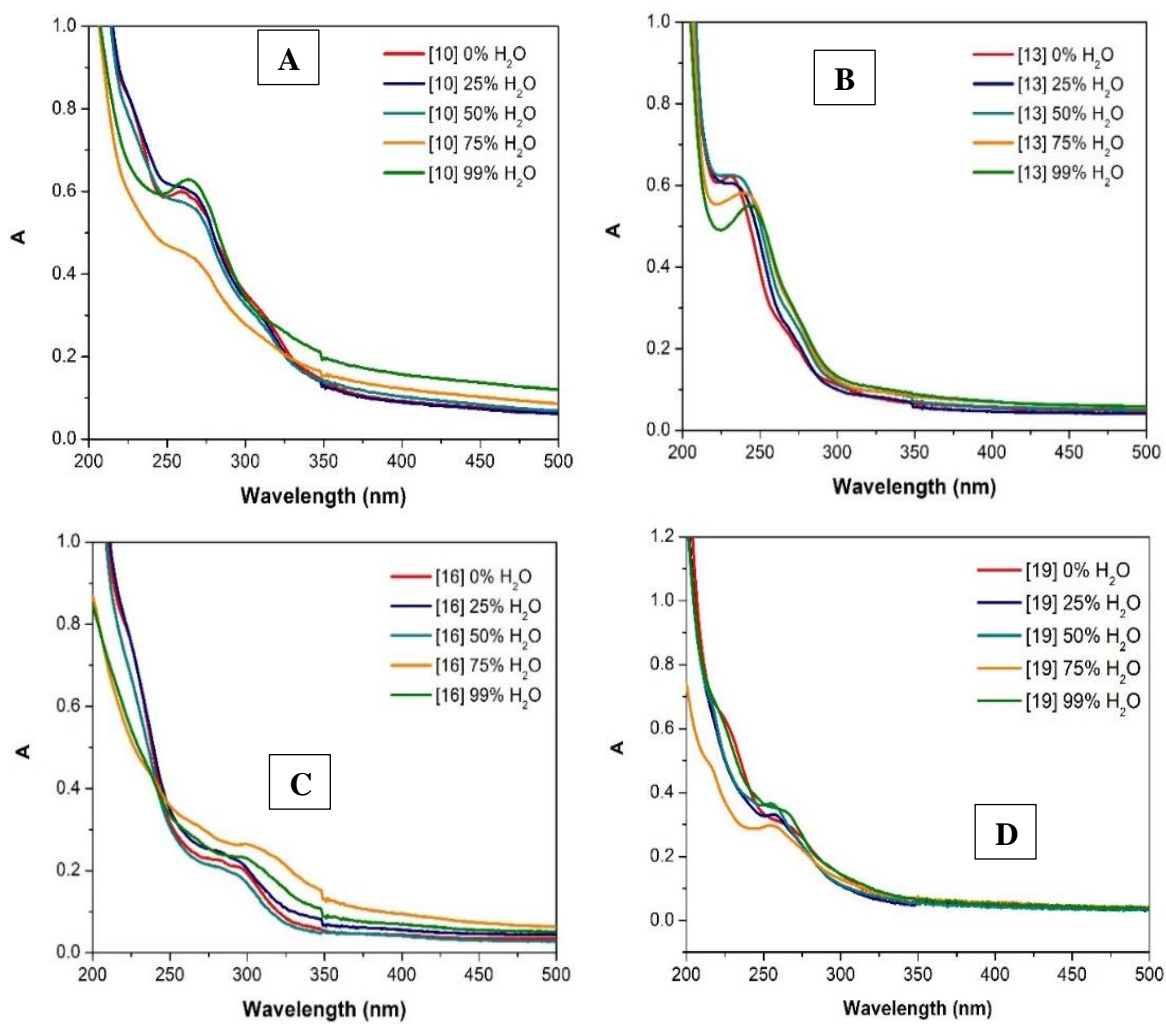

**Figure S88.-** Absorption spectra of the formed aggregates of **10**(12A), **13**(12B), **16**(12C), and **19**(12D) compounds in the function of the % of water in the samples.

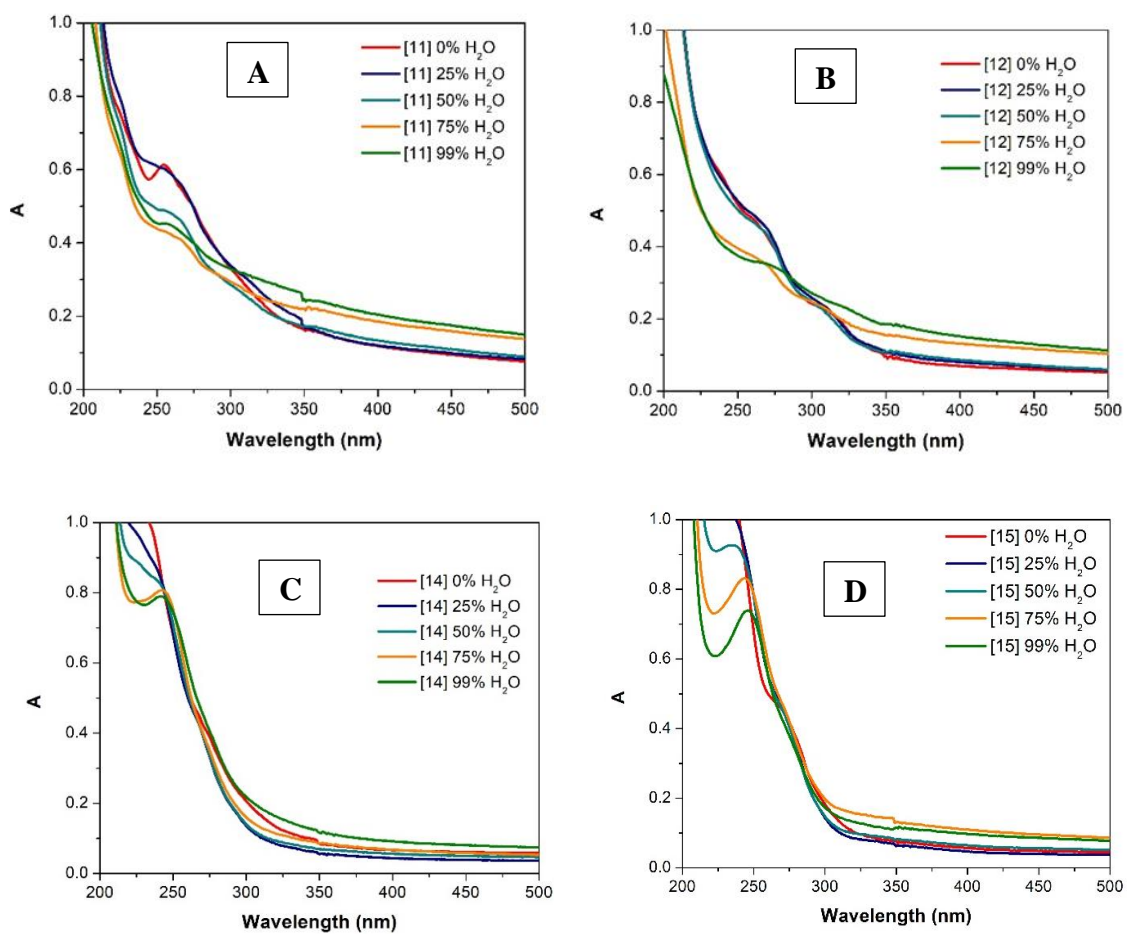

**Figure S89.-** Absorption spectra of the formed aggregates of **11**(A), **12**(B), **14**(C), **15**(D,) compounds in the function of the % of water in the samples.

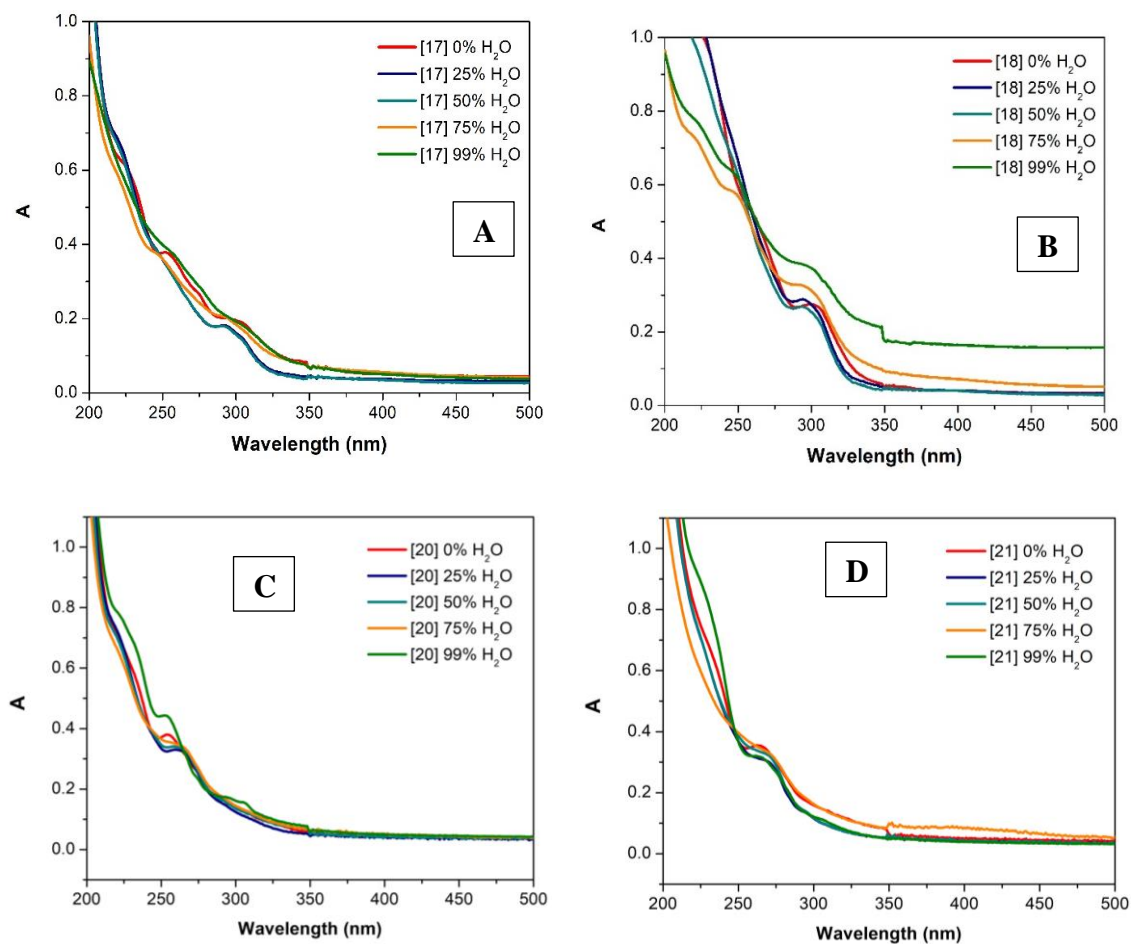

**Figure S90.-** Absorption spectra of the formed aggregates of **17**(A), **18** (B), **20** (C) and **21**(D) compounds in the function of the % of water in the samples.



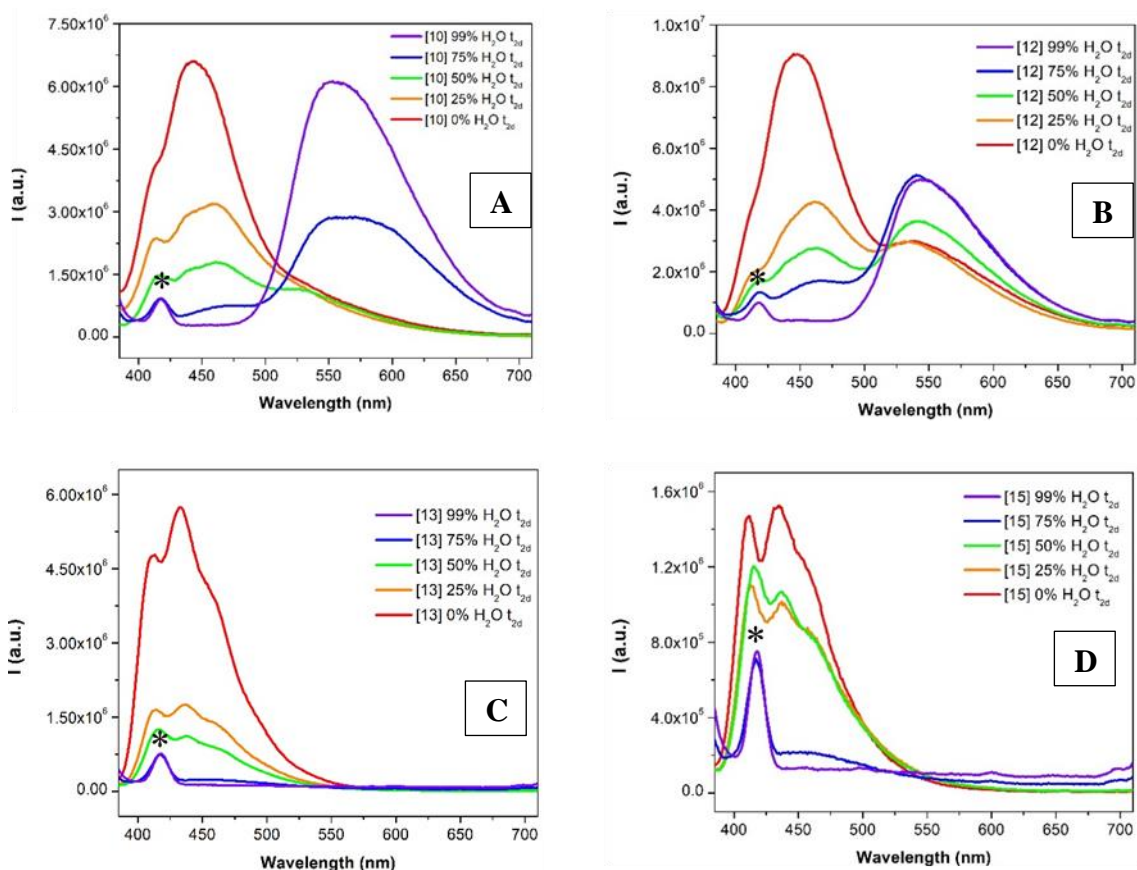

**Figure S91.** Emission spectra of compounds **11(A)**, **12(B)**, **14(C)**, **15(D)** compounds at different % of water in acetonitrile:water solutions after 2 days ( $\lambda_{exc} = 350$  nm). \* Indicates residual of the Raman band.

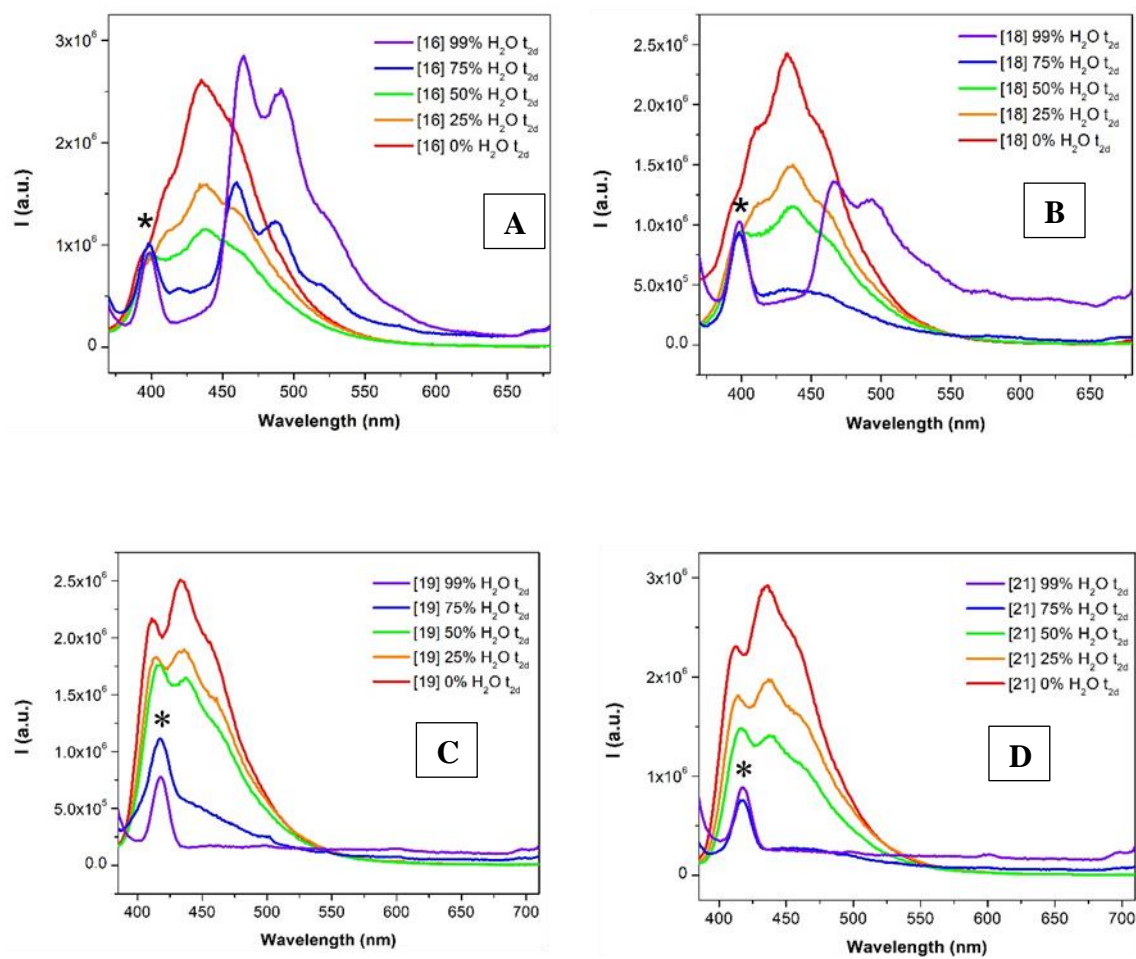

**Figure S92.** Emission spectra of compounds **16(A)**, **18(B)**, **19(C)**, **21(D)** compounds at different % of water in acetonitrile:water solutions after 2 days ( $\lambda_{\text{exc}} = 350$  nm).

\* Indicates residual of the Raman band.

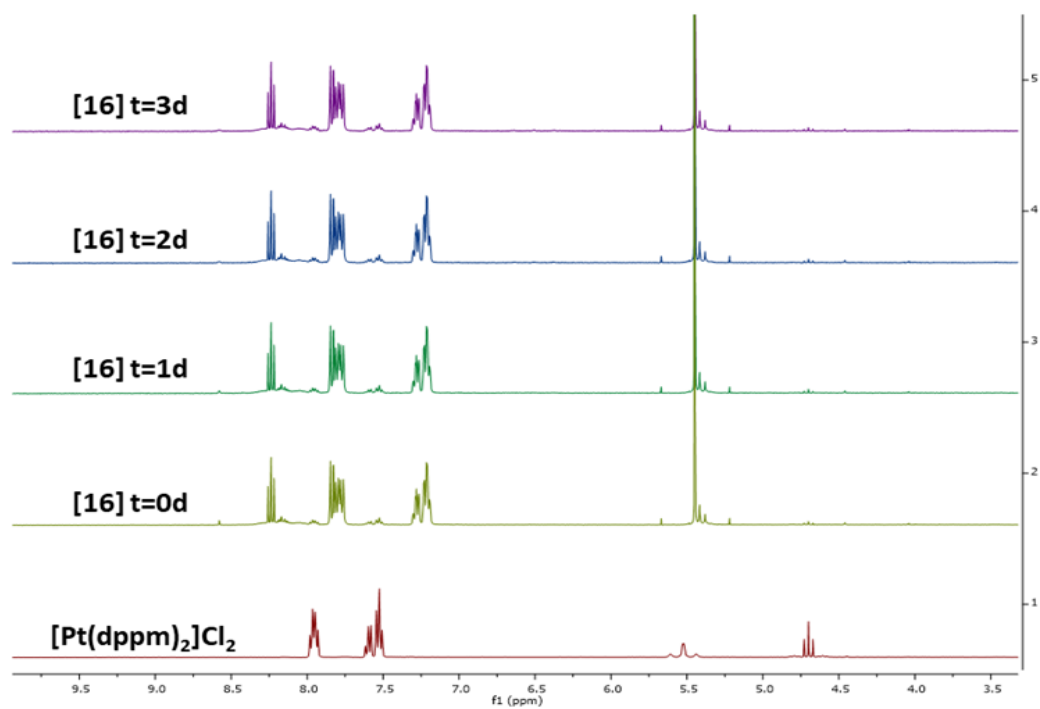

Figure S93.  $^1\text{H}$  NMR spectra in  $\text{CD}_3\text{CN}$  of compounds **16** and  $[\text{Pt}(\text{dppm})_2]\text{Cl}_2$  at different times

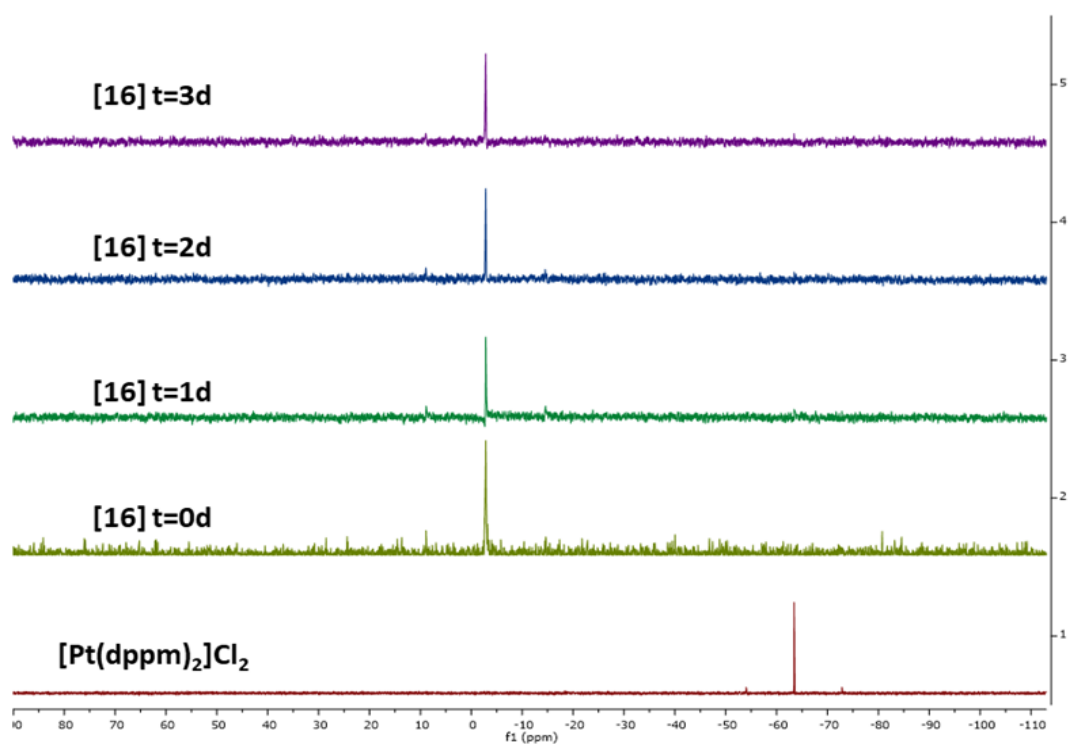

Figure S94.  $^{31}\text{P}\{^1\text{H}\}$  NMR spectra in  $\text{CD}_3\text{CN}$  of compounds **16** and  $[\text{Pt}(\text{dppm})_2]\text{Cl}_2$  at different times.

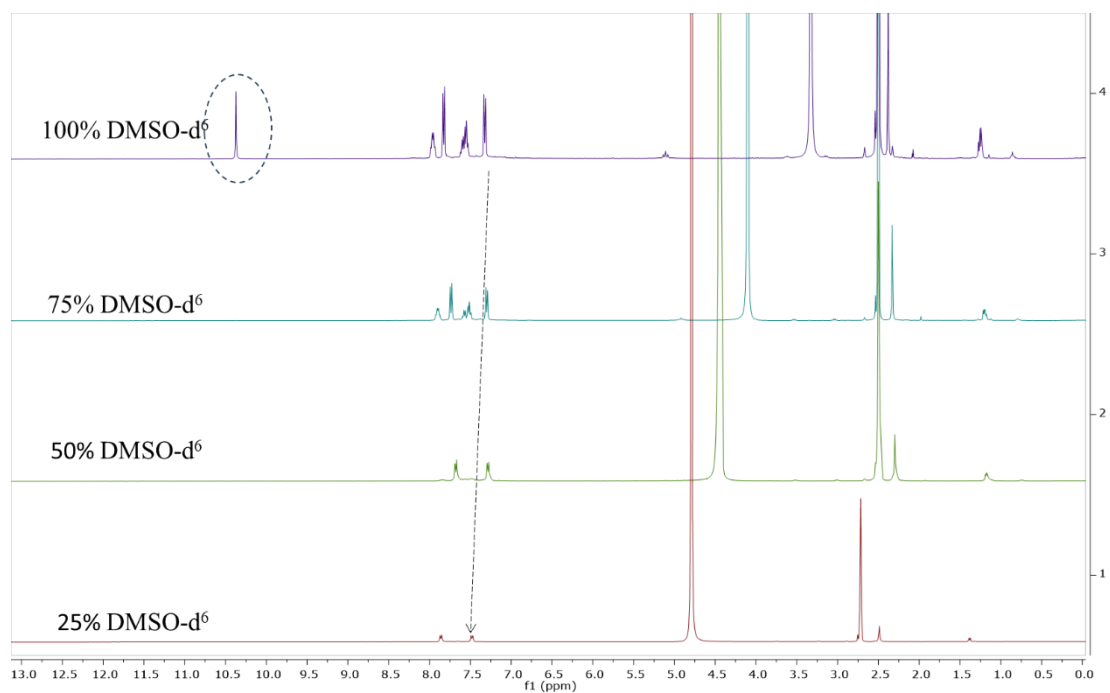

**Figure S95.**  $^1\text{H}$  NMR spectra in  $\text{DMSO-d}_6$  of compound **13** at different mixtures  $\text{DMSO:D}_2\text{O}$

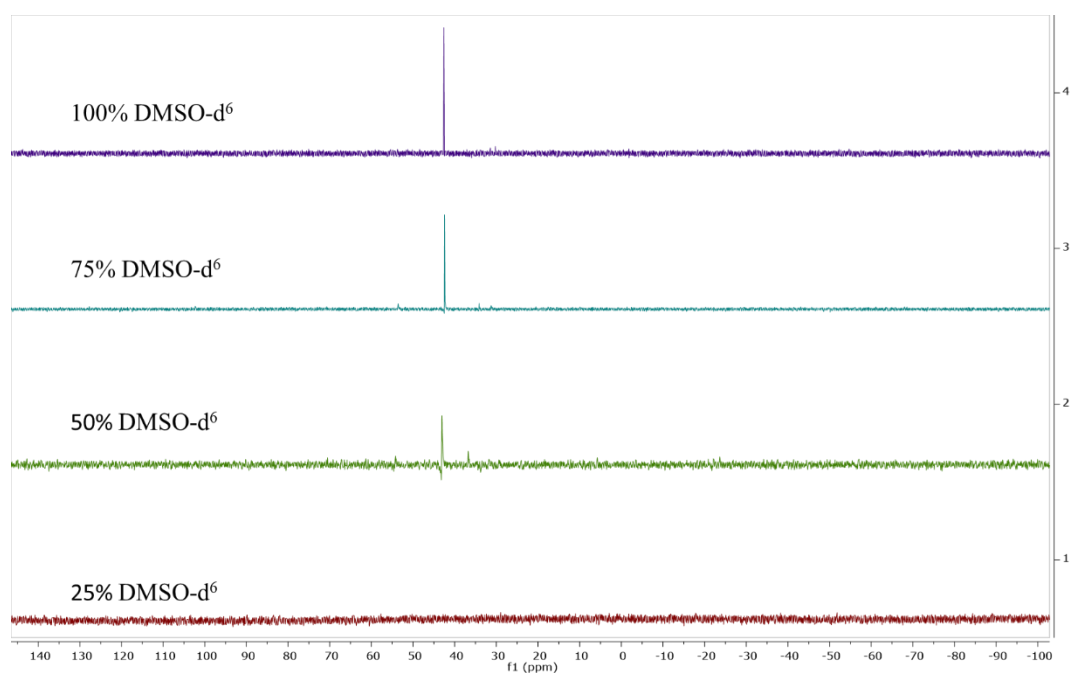

**Figure S96.**  $^{31}\text{P}\{^1\text{H}\}$  NMR spectra in  $\text{DMSO-d}_6$  of compound **13** at different mixtures  $\text{DMSO:D}_2\text{O}$

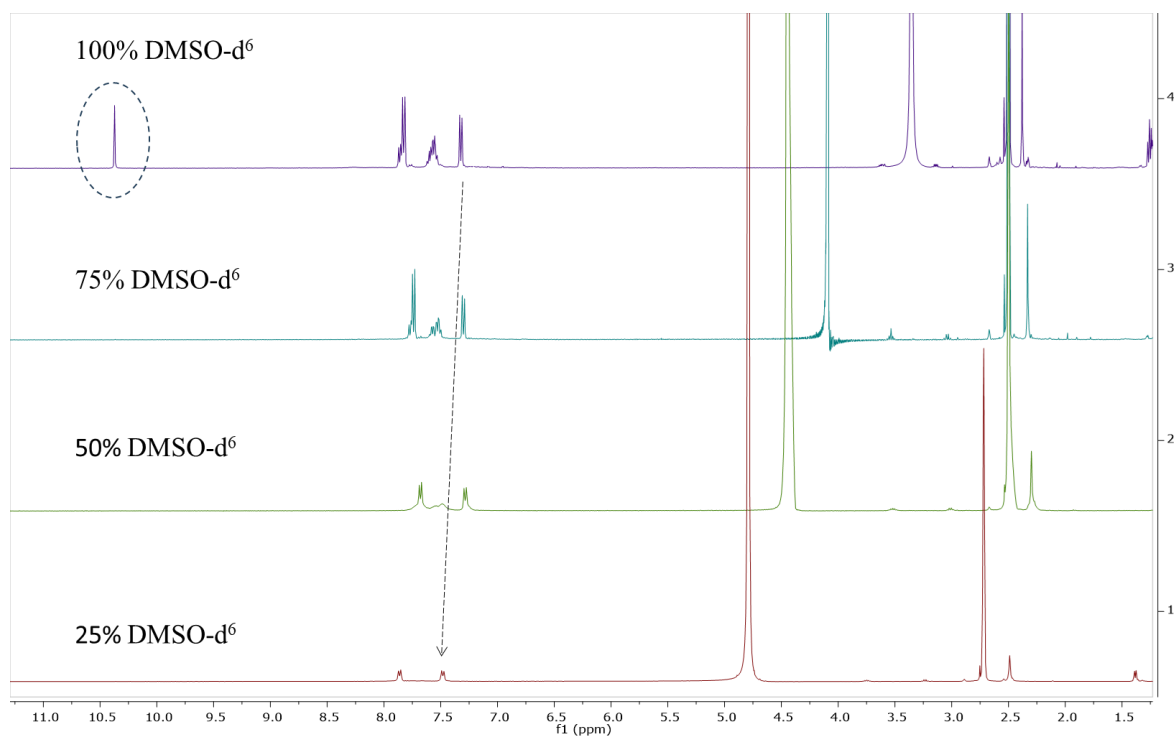

**Figure S97.**  $^1\text{H}$  NMR spectra in  $\text{DMSO-d}^6$  of compound **14** at different mixtures  $\text{DMSO:D}_2\text{O}$

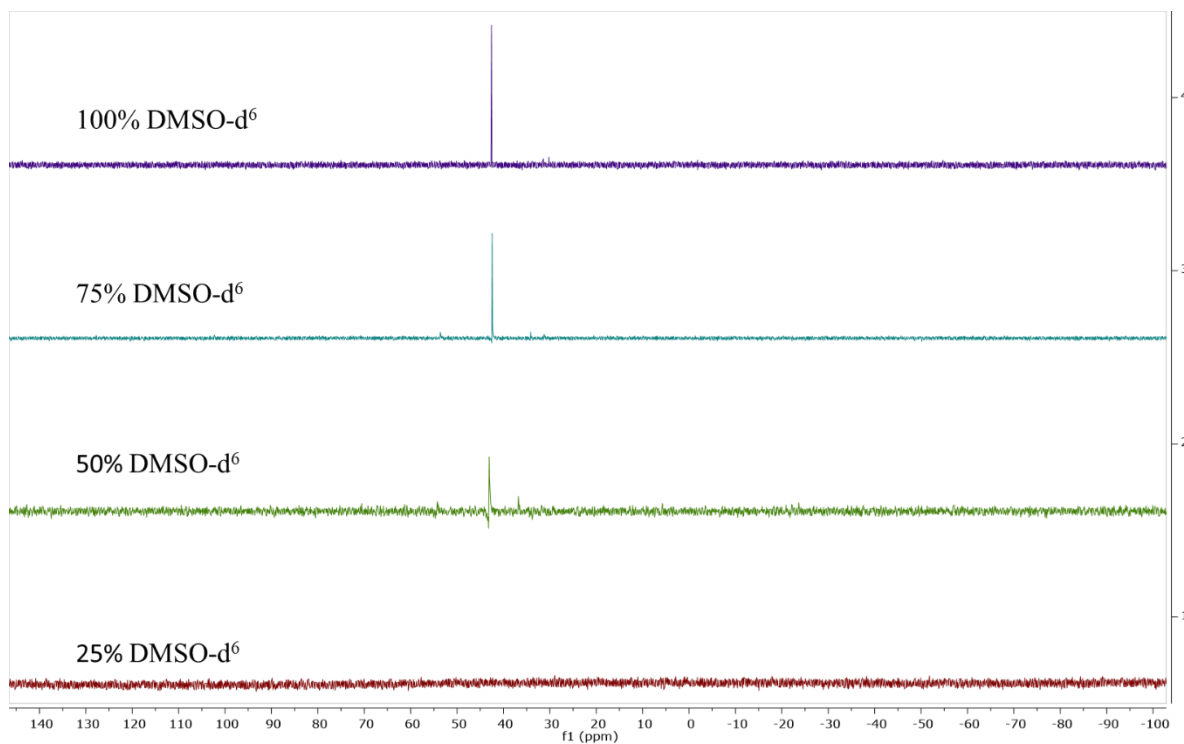

**Figure S98.**  $^{31}\text{P}\{^1\text{H}\}$  NMR spectra in  $\text{DMSO-d}^6$  of compound **14** at different mixtures  $\text{DMSO:D}_2\text{O}$

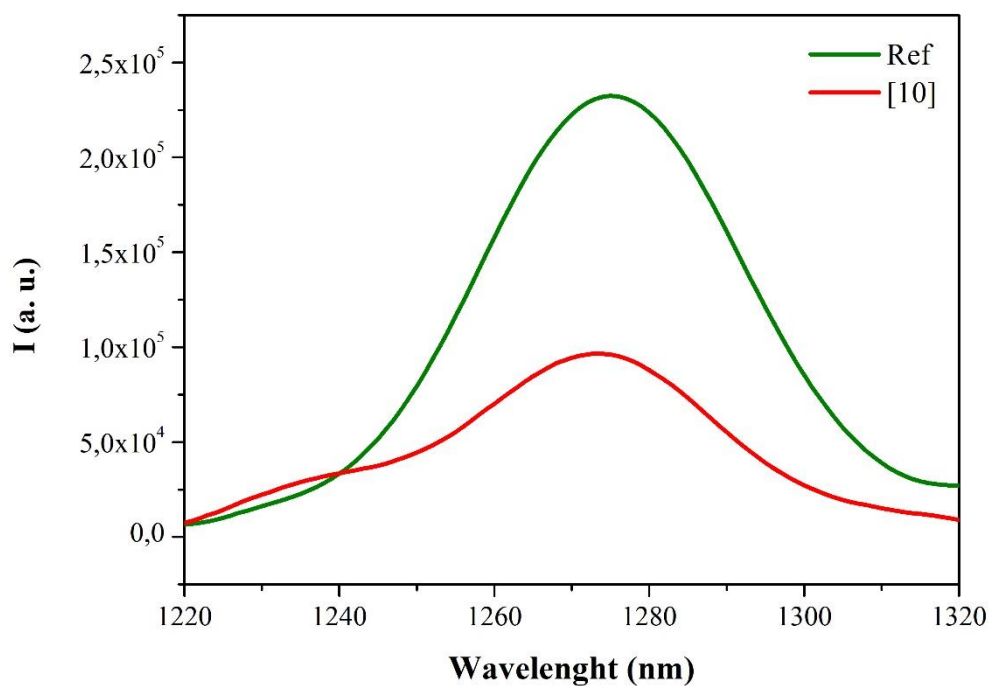

**Figure S99.**  $^1\text{O}_2$  production of complex **10** in acetonitrile air-equilibrated solutions at  $\lambda_{\text{exc}} = 330 \text{ nm}$

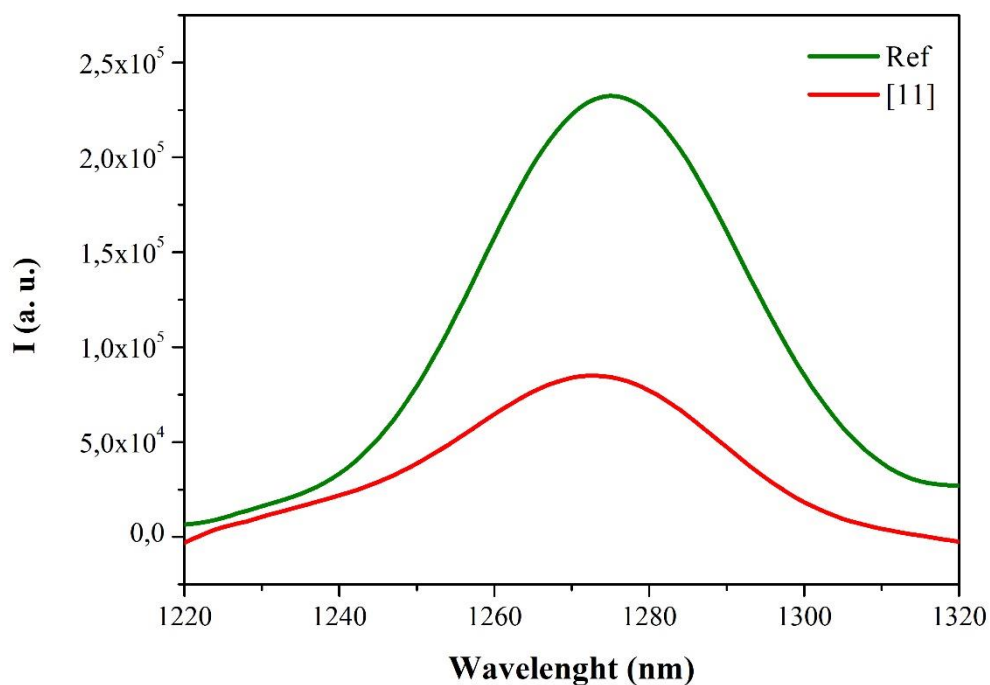

**Figure S100.**  $^1\text{O}_2$  production of complex **11** in acetonitrile air-equilibrated solutions at  $\lambda_{\text{exc}} = 330 \text{ nm}$

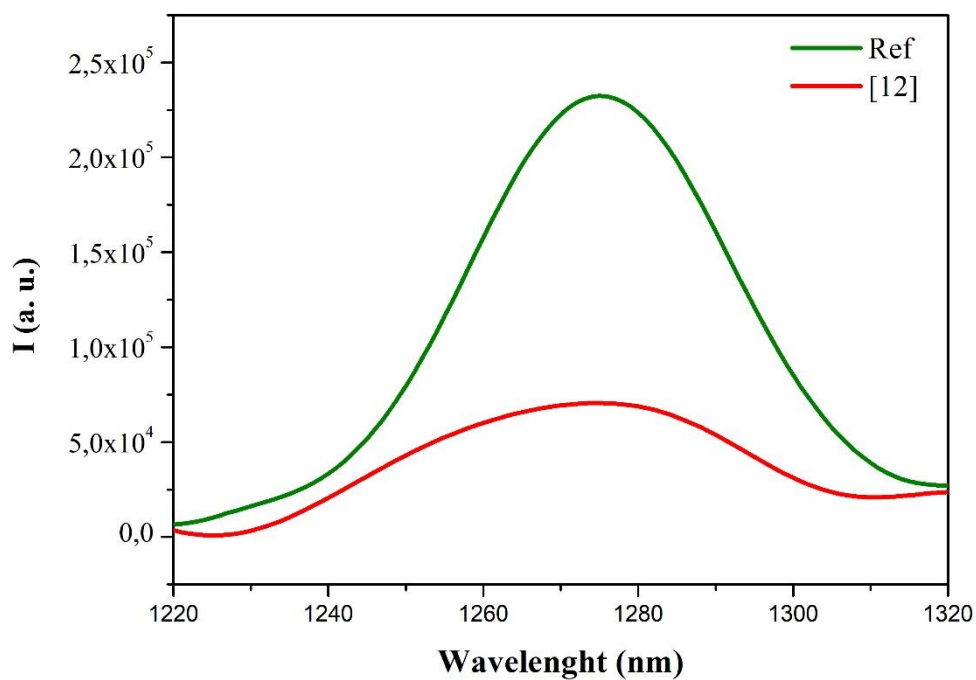

**Figure S101.**  $^1\text{O}_2$  production of complex **12** in acetonitrile air-equilibrated solutions at  $\lambda_{\text{exc}} = 330\text{nm}$ .

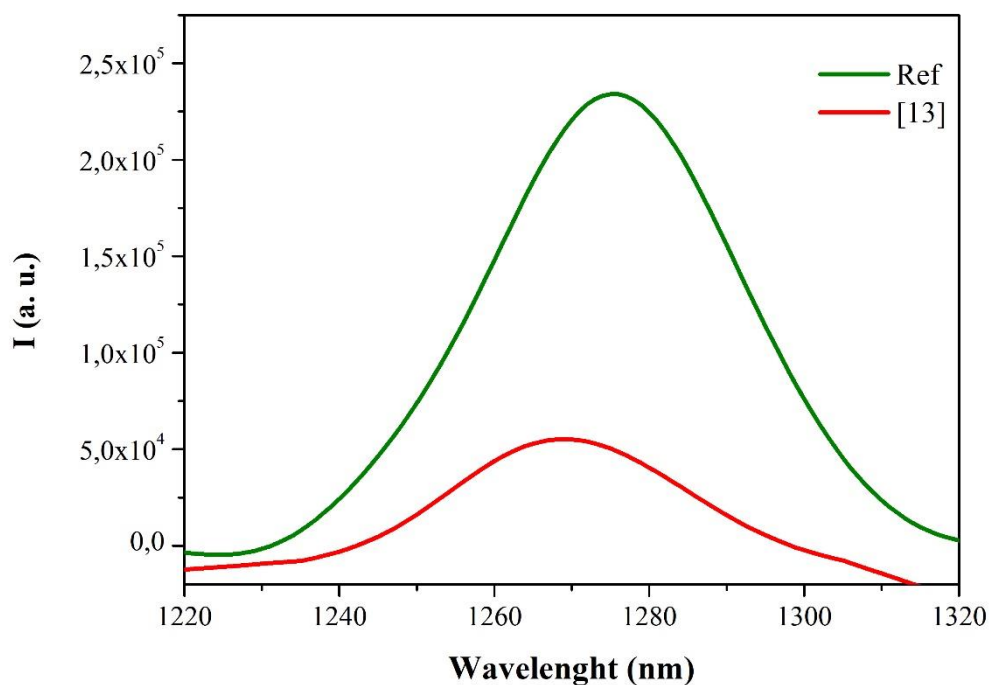

**Figure S102.**  $^1\text{O}_2$  production of complex **13** in acetonitrile air-equilibrated solutions at  $\lambda_{\text{exc}} = 330\text{nm}$ .

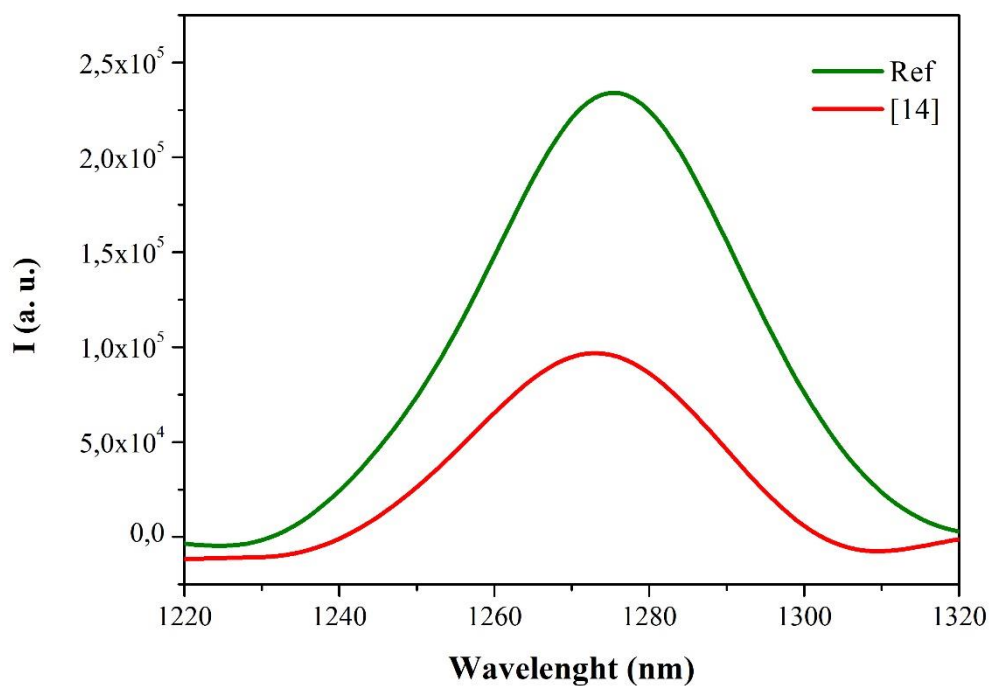

**Figure S103.**  $^1\text{O}_2$  production of complex **14** in acetonitrile air-equilibrated solutions at  $\lambda_{\text{exc}} = 330\text{nm}$ .

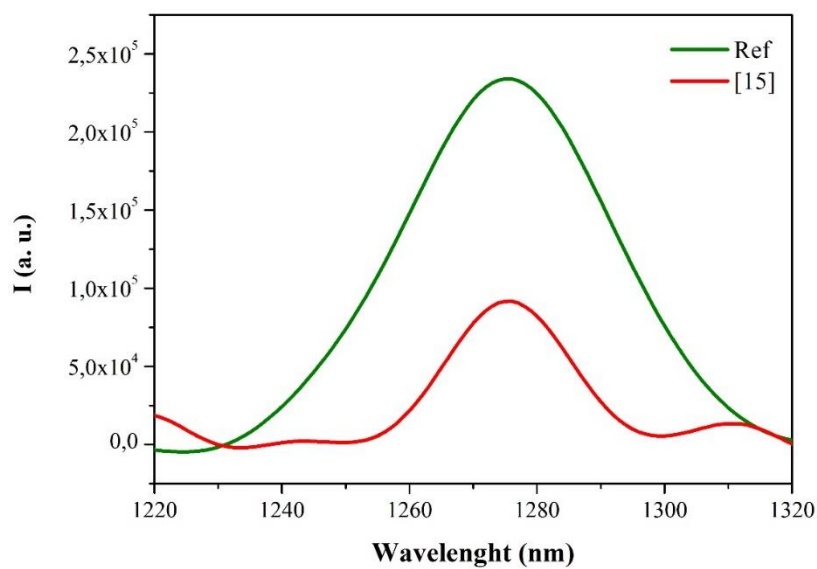

**Figure S104.**  $^1\text{O}_2$  production of complex **15** in acetonitrile air-equilibrated solutions at  $\lambda_{\text{exc}} = 330\text{nm}$



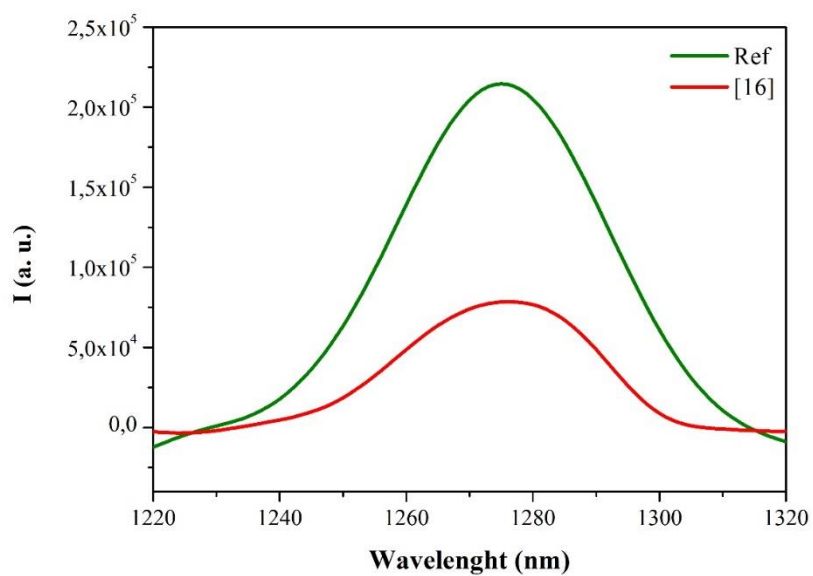

**Figure S105.**  $^1\text{O}_2$  production of complex **16** in acetonitrile air-equilibrated solutions at  $\lambda_{\text{exc}} = 330\text{nm}$

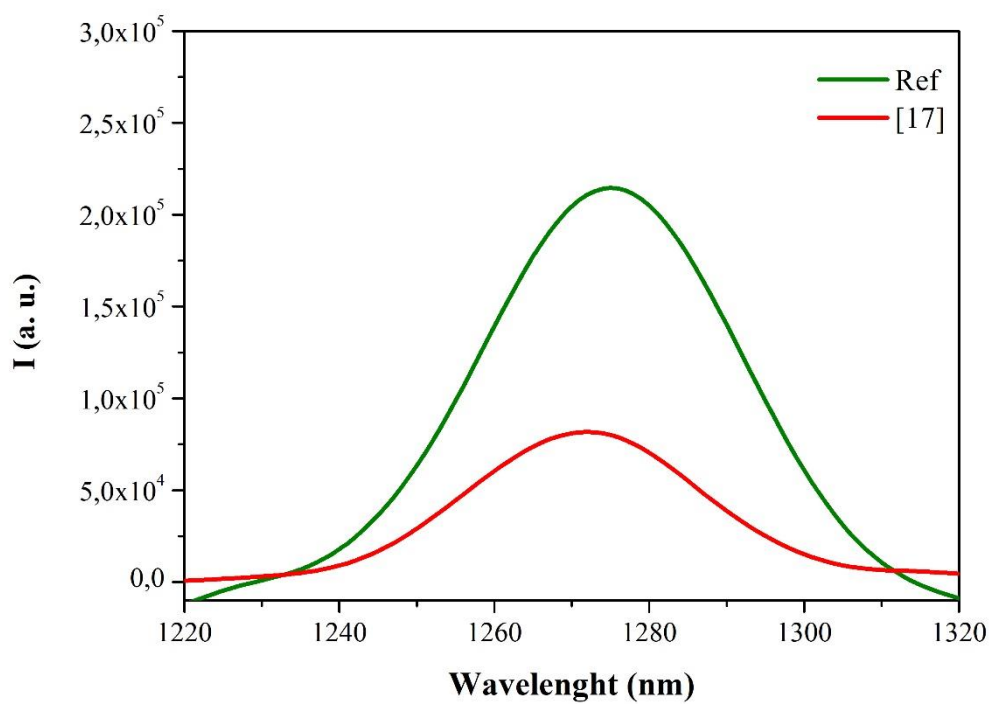

**Figure S106.**  $^1\text{O}_2$  production of complex **17** in acetonitrile air-equilibrated solutions at  $\lambda_{\text{exc}} = 330\text{nm}$ .

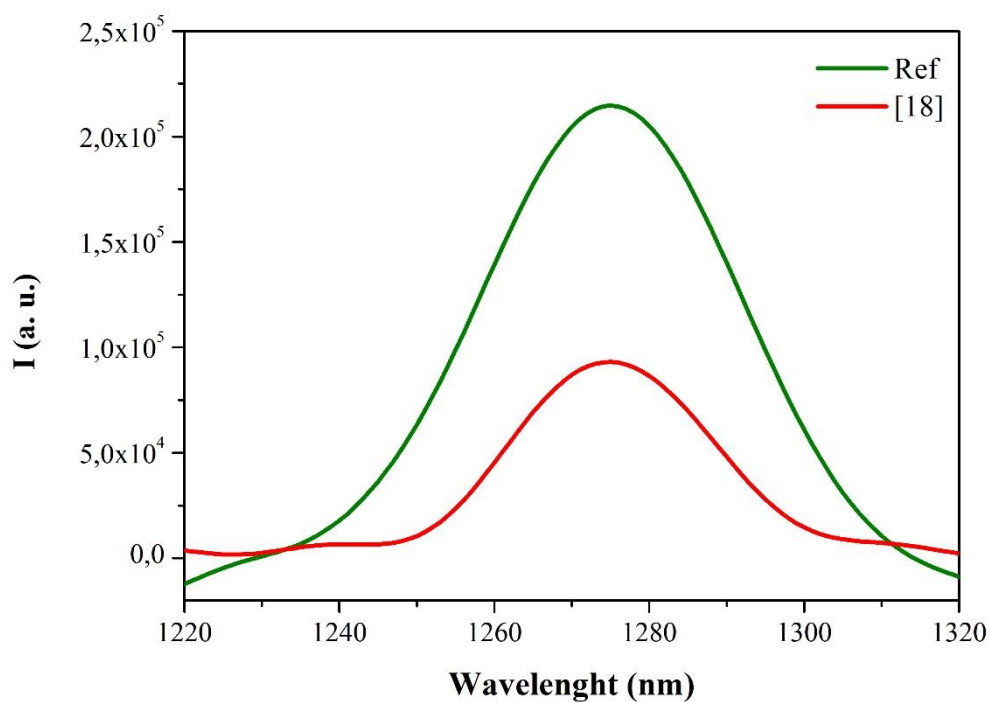

**Figure S107.**  $^1\text{O}_2$  production of complex **18** in acetonitrile air-equilibrated solutions at  $\lambda_{\text{exc}} = 330\text{nm}$ .

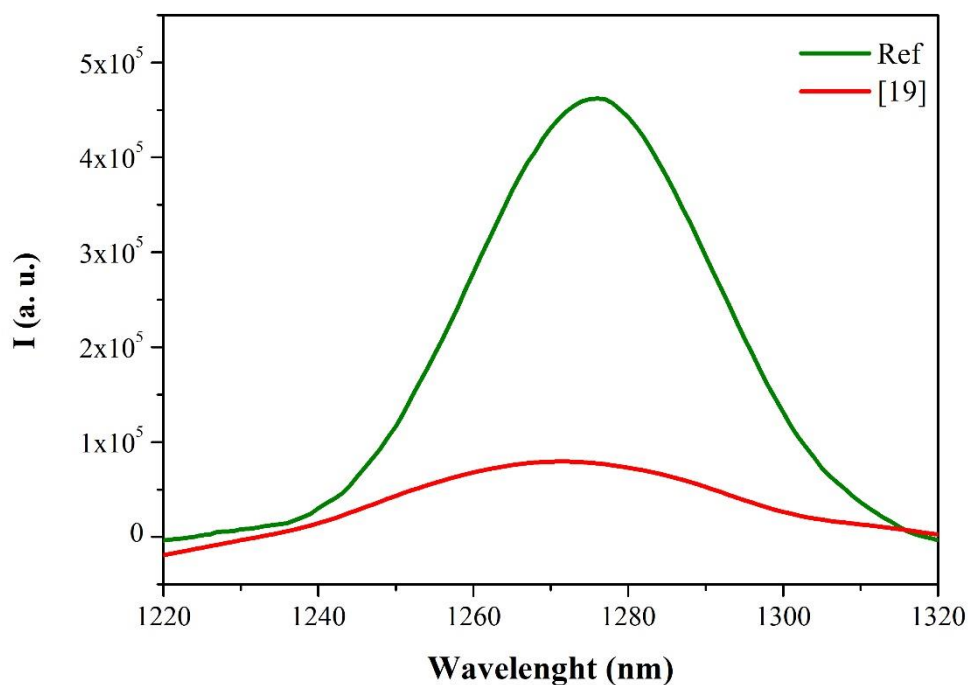

**Figure S108.**  $^1\text{O}_2$  production of complex **19** in acetonitrile air-equilibrated solutions at  $\lambda_{\text{exc}} = 330\text{nm}$ .

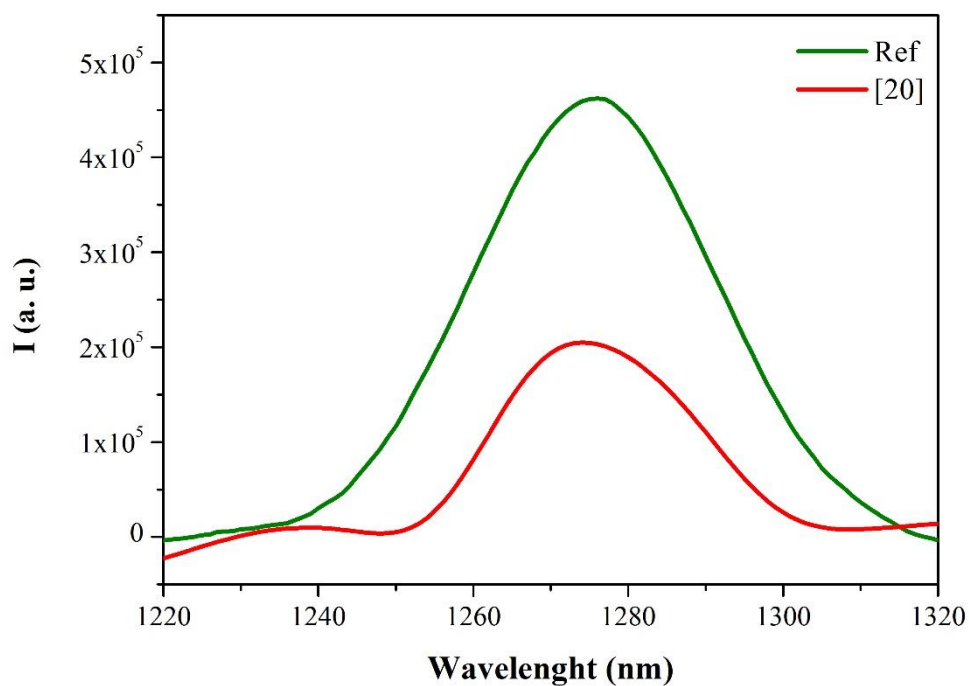

**Figure S109.**  $^1\text{O}_2$  production of complex **20** in acetonitrile air-equilibrated solutions at  $\lambda_{\text{exc}} = 330\text{nm}$

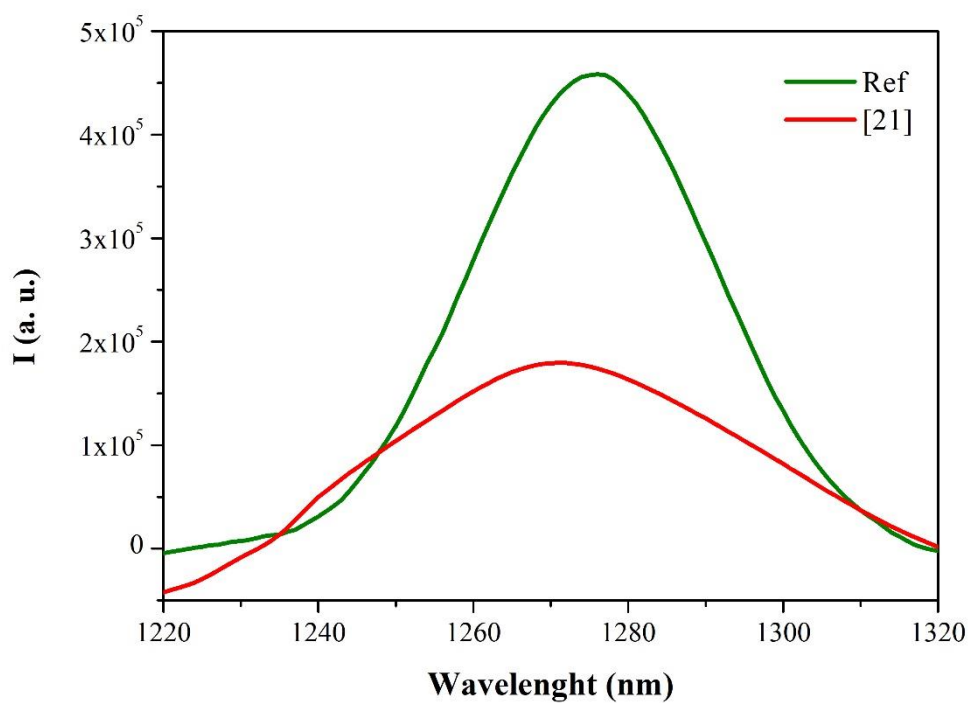

**Figure S110.**  $^1\text{O}_2$  production of complex **21** in acetonitrile air-equilibrated solutions at  $\lambda_{\text{exc}} = 330\text{nm}$

### Comparison of experimental and geometric parameters of the Pt-complexes retrieved from the CSD.

Figure S111 shows the X-ray and DFT optimized geometries of three Pt-complexes (the CSD reference codes are indicated) that are related to those reported herein. The main difference is that they are mononuclear compounds, but the ligands are very similar. It can be observed a good agreement between the optimized and experimental geometries. The coordination distances and N–Pt–N angle are also in good agreement. The values in red correspond to the optimized geometries without dispersion (D3). It can be observed that the agreement is also acceptable, although the Ph<sub>3</sub>P–Pt and N(triazole)–Pt distances are longer than those with D3 and much longer than the experimental ones. Moreover, the dihedral angle between the phenyl and triazole rings in RUDVET is better reproduced if D3 correction is used.

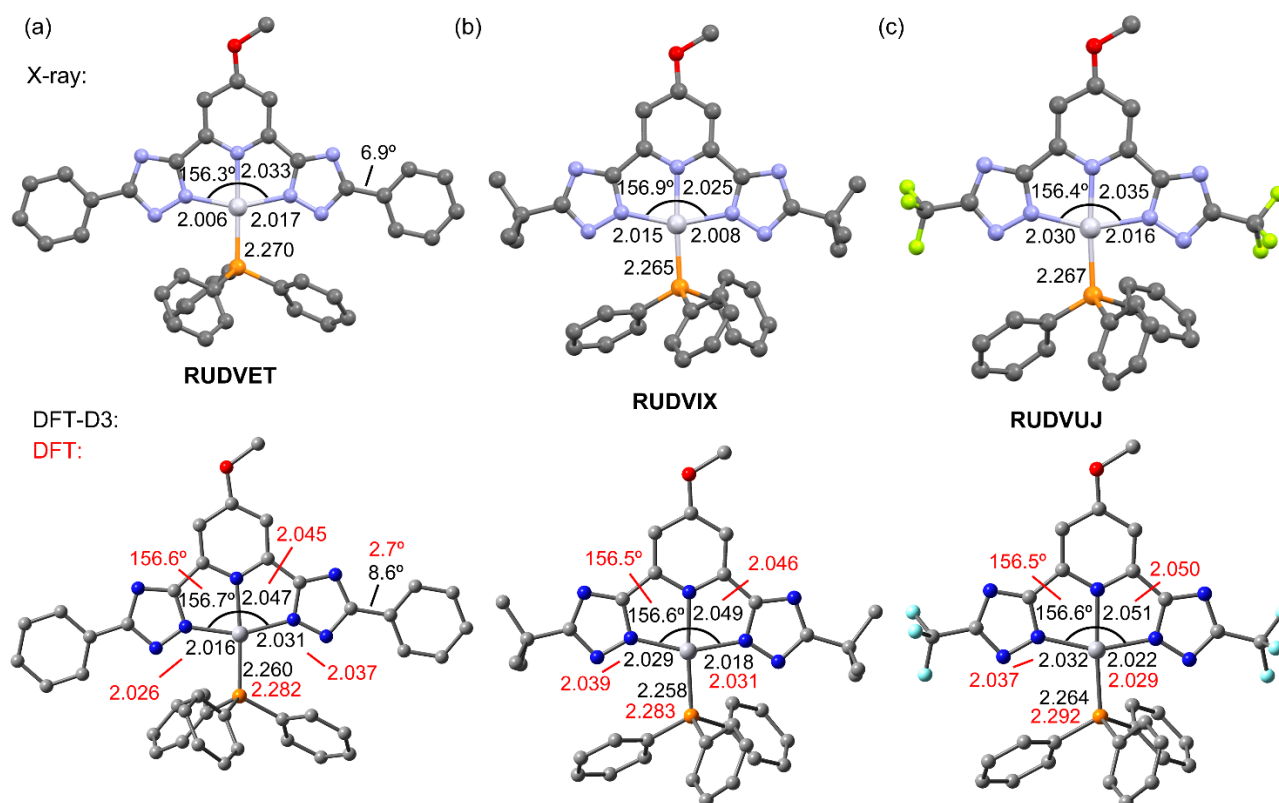

**Figure S111.** X-ray (top panel) and DFT (low panel) of RUDVET (a), RUDVIX (b) and RUDVUJ (c) structures. Distances are indicated in Å. In the bottom panel the distances indicated in black correspond to RI-PB86-D3/def2-TVP level and those in red to RI-PB86/def2-TVP level of theory.

**Table S1.** Radiative ( $k_r$ ) and non-radiative ( $k_{nr}$ ) constants of the gold(I) complexes **10-21** in acetonitrile solution.

| Complex   | $k_r$ (air-eq) $\times 10^5 \text{ s}^{-1}$ | $k_{nr}$ (air-eq) $\times 10^5 \text{ s}^{-1}$ | $k_r$ ( $\text{N}_2$ sat) $\times 10^5 \text{ s}^{-1}$ | $k_{nr}$ ( $\text{N}_2$ sat) $\times 10^5 \text{ s}^{-1}$ |
|-----------|---------------------------------------------|------------------------------------------------|--------------------------------------------------------|-----------------------------------------------------------|
| <b>10</b> | 0.1                                         | 10.3                                           | 0.2                                                    | 2.2                                                       |
| <b>11</b> | 0.5                                         | 15.9                                           | 0.2                                                    | 2.8                                                       |
| <b>12</b> | 0.3                                         | 13.8                                           | 0.4                                                    | 3.8                                                       |
| <b>13</b> | 8.1                                         | 2690                                           | 6.4                                                    | 2120                                                      |
| <b>14</b> | 6.0                                         | 1990                                           | 5.6                                                    | 1880                                                      |
| <b>15</b> | 4.26                                        | 2120                                           | 6.4                                                    | 2120                                                      |
| <b>16</b> | 22.7                                        | 2250                                           | 12.0                                                   | 1190                                                      |
| <b>17</b> | 17.9                                        | 1770                                           | 28.2                                                   | 1380                                                      |
| <b>18</b> | 45.5                                        | 4500                                           | 43.5                                                   | 4300                                                      |
| <b>19</b> | 42.9                                        | 7100                                           | 50.0                                                   | 7090                                                      |
| <b>20</b> | 42.9                                        | 7100                                           | 40.0                                                   | 6630                                                      |
| <b>21</b> | 33.3                                        | 6630                                           | 31.1                                                   | 6220                                                      |

**Table S2.** Lifetime values and amplitudes of compounds **10-21** measured in acetonitrile.

| Complex   | $\tau$ air-eq ns<br>(Amplitude) | $\tau$ N <sub>2</sub> sat, ns<br>(Amplitude) | $\tau$ air-eq $\mu$ s<br>(Amplitude) | $\tau$ N <sub>2</sub> sat, $\mu$ s<br>(Amplitude) |
|-----------|---------------------------------|----------------------------------------------|--------------------------------------|---------------------------------------------------|
| <b>10</b> |                                 |                                              | $\tau_1 = 0.32$<br>(52.14)           | $\tau_1 = 1.04$<br>(23.54)                        |
|           |                                 |                                              | $\tau_2 = 1.67$<br>(47.86)           | $\tau_2 = 4.92$<br>(76.46)                        |
| <b>11</b> |                                 |                                              | $\tau_1 = 0.24$<br>(48.91)           | $\tau_1 = 0.58$<br>(35.75)                        |
|           |                                 |                                              | $\tau_2 = 0.98$<br>(51.09)           | $\tau_2 = 4.83$<br>(64.26)                        |
| <b>12</b> |                                 |                                              | $\tau_1 = 0.30$<br>(51.57)           | $\tau_1 = 0.59$<br>(37.14)                        |
|           |                                 |                                              | $\tau_2 = 1.15$<br>(48.43)           | $\tau_2 = 3.50$<br>(62.86)                        |
| <b>13</b> | $\tau_1 = 1.6$ (79.65)          | $\tau_1 = 1.7$ (22.46)                       |                                      |                                                   |
|           | $\tau_2 = 12.5$ (20.35)         | $\tau_2 = 13.9$ (77.54)                      |                                      |                                                   |
| <b>14</b> | $\tau_1 = 1.9$ (83.29)          | $\tau_1 = 2.0$ (77.79)                       |                                      |                                                   |
|           | $\tau_2 = 19.8$ (16.71)         | $\tau_2 = 17.5$ (22.21)                      |                                      |                                                   |
| <b>15</b> | $\tau_1 = 1.9$ (78.22)          | $\tau_1 = 1.9$ (77.62)                       |                                      |                                                   |
|           | $\tau_2 = 18.8$ (21.78)         | $\tau_2 = 15.8$ (22.38)                      |                                      |                                                   |
| <b>16</b> | $\tau_1 = 2.2$ (61.57)          | $\tau_1 = 2.8$ (59.80)                       |                                      |                                                   |
|           | $\tau_2 = 8.0$ (38.43)          | $\tau_2 = 16.7$ (40.20)                      |                                      |                                                   |
| <b>17</b> | $\tau_1 = 2.4$ (49.08)          | $\tau_1 = 3.6$ (69.59)                       | $\tau_1 = 0.05$<br>(29.84)           | $\tau_1 = 0.01$<br>(88.17)                        |
|           | $\tau_2 = 8.7$ (50.92)          | $\tau_2 = 14.9$ (30.41)                      | $\tau_2 = 0.08$<br>(70.16)           | $\tau_2 = 0.15$<br>(11.83)                        |
| <b>18</b> | $\tau_1 = 2.2$ (100)            | $\tau_1 = 0.5$ (5.07)                        | $\tau_1 = 0.01$<br>(81.30)           | $\tau_1 = 0.02$<br>(58.46)                        |
|           |                                 | $\tau_2 = 2.2$ (94.93)                       | $\tau_2 = 0.14$<br>(18.70)           | $\tau_2 = 0.30$<br>(41.54)                        |
| <b>19</b> | $\tau_1 = 1.4$ (100)            | $\tau_1 = 1.4$ (100)                         |                                      |                                                   |
| <b>20</b> | $\tau_1 = 1.4$ (100)            | $\tau_1 = 1.5$ (100)                         |                                      |                                                   |
| <b>21</b> | $\tau_1 = 1.5$ (100)            | $\tau_1 = 1.6$ (100)                         |                                      |                                                   |

**Table S3.** Photophysical data of aggregates of compounds **10-21** in  $10^{-5}$  M water/acetonitrile solutions.

| Compound | % water | $\phi$ | $\tau$ ( $\mu$ s) | $k_r$ ( $\times 10^5$ s $^{-1}$ ) | $k_{nr}$ ( $\times 10^5$ s $^{-1}$ ) |
|----------|---------|--------|-------------------|-----------------------------------|--------------------------------------|
| 10       | 0       | 0.01   | 0.23              | 0.53                              | 42.60                                |
|          | 75      | 0.04   | 1.14              | 0.37                              | 8.40                                 |
|          | 99      | 0.05   | 1.20              | 0.43                              | 7.90                                 |
| 11       | 0       | 0.02   | 1.3E-2            | 232                               | 746                                  |
|          | 75      | 0.02   | 0.26              | 0.74                              | 3.77                                 |
|          | 99      | 0.02   | 0.33              | 0.46                              | 2.98                                 |
| 12       | 0       | 0.01   | 0.30              | 0.50                              | 32.8                                 |
|          | 75      | 0.03   | 0.72              | 0.35                              | 13.5                                 |
|          | 99      | 0.03   | 0.85              | 0.34                              | 11.4                                 |
| 13       | 0       | 0.01   | 3.7E-3            | 8.1                               | 2690                                 |
|          | 75      | -      | -                 | -                                 | -                                    |
|          | 99      | -      | -                 | -                                 | -                                    |
| 14       | 0       | 0.01   | 5.0E-3            | 6.0                               | 1990                                 |
|          | 75      | -      | -                 | -                                 | -                                    |
|          | 99      | -      | -                 | -                                 | -                                    |
| 15       | 0       | 0.01   | 5.8E-3            | 4.26                              | 2120                                 |
|          | 75      | -      | -                 | -                                 | -                                    |
|          | 99      | -      | -                 | -                                 | -                                    |
| 16       | 0       | 0.02   | 1.3E-2            | 232                               | 746                                  |
|          | 75      | 0.02   | 0.26              | 0.74                              | 3.77                                 |
|          | 99      | 0.02   | 0.33              | 0.46                              | 2.98                                 |
| 17       | 0       | 0.01   | 2.1E-2            | 4.57                              | 47.2                                 |
|          | 75      | 0.02   | 8.2E-2            | 1.66                              | 12.0                                 |
|          | 99      | 0.02   | 0.20              | 0.91                              | 4.91                                 |
| 18       | 0       | 0.01   | 0.11              | 1.00                              | 89.9                                 |
|          | 75      | 0.02   | 0.42              | 0.35                              | 23.5                                 |
|          | 99      | 0.01   | 6.2E-2            | 1.55                              | 16.0                                 |
| 19       | 0       | 0.01   | 1.4E-3            | 42.9                              | 7100                                 |
|          | 75      | -      | -                 | -                                 | -                                    |

|    |    |      |        |      |      |
|----|----|------|--------|------|------|
|    | 99 | -    | -      | -    | -    |
| 20 | 0  | 0.01 | 1.4E-3 | 42.9 | 7100 |
|    | 75 | -    | -      | -    | -    |
|    | 99 | -    | -      | -    | -    |
| 21 | 0  | 0.01 | 1.5E-3 | 33.3 | 6630 |
|    | 75 | -    | -      | -    | -    |
|    | 99 | -    | -      | -    | -    |

---



## Cartesian Coordinates

11

Energy = -4469.034576817

|    |            |            |            |
|----|------------|------------|------------|
| Pt | 2.8284727  | 3.4285429  | 4.5314759  |
| P  | 1.3059004  | 2.8721122  | 2.9532288  |
| N  | 2.9578862  | 5.4413943  | 4.3234229  |
| N  | 2.2928673  | 6.4085652  | 3.6714218  |
| N  | 4.3795238  | 3.8819506  | 5.7988311  |
| N  | 3.3006816  | 1.6060743  | 5.2557759  |
| N  | 2.8143831  | 0.3669627  | 5.1564137  |
| C  | 2.9228234  | 7.5536154  | 4.0366250  |
| C  | 3.9573912  | 6.0361794  | 5.0582238  |
| C  | 4.7758650  | 5.1724100  | 5.8861301  |
| C  | 5.8420406  | 5.5056526  | 6.7262629  |
| H  | 6.1350959  | 6.5483328  | 6.8294634  |
| C  | 6.4626616  | 4.4766332  | 7.4404514  |
| C  | 6.0467904  | 3.1464691  | 7.3143655  |
| H  | 6.5213644  | 2.3341252  | 7.8608792  |
| C  | 4.9765534  | 2.8633258  | 6.4597572  |
| C  | 4.3454883  | 1.5930821  | 6.1581682  |
| C  | 3.5884130  | -0.3656719 | 5.9956496  |
| C  | 1.6206574  | 3.6830763  | 1.3387928  |
| C  | 2.7289555  | 4.5146935  | 1.1370874  |
| H  | 3.4234007  | 4.6998113  | 1.9536395  |
| C  | 2.9424914  | 5.1101062  | -0.1088289 |
| H  | 3.8052991  | 5.7616777  | -0.2521381 |
| C  | 2.0554768  | 4.8771840  | -1.1608518 |
| H  | 2.2223193  | 5.3459818  | -2.1317220 |
| C  | 0.9567525  | 4.0317087  | -0.9716616 |
| H  | 0.2693248  | 3.8319395  | -1.7948541 |
| C  | 0.7435459  | 3.4341936  | 0.2694741  |
| H  | -0.0991801 | 2.7519728  | 0.3995463  |
| C  | -0.4306131 | 3.3238708  | 3.3459373  |
| C  | -0.5310920 | 4.7841459  | 3.8284662  |
| C  | 1.3018782  | 1.1051620  | 2.5298135  |
| C  | 2.5069310  | 0.5616863  | 2.0556159  |
| H  | 3.3814313  | 1.2045192  | 1.9391587  |
| C  | 2.5955555  | -0.7972800 | 1.7685869  |
| H  | 3.5388687  | -1.2166259 | 1.4168957  |
| C  | 1.4830071  | -1.6259479 | 1.9543916  |
| H  | 1.5594142  | -2.6945249 | 1.7487120  |
| C  | 0.2820880  | -1.0898804 | 2.4211402  |
| H  | -0.5849501 | -1.7302568 | 2.5878810  |
| C  | 0.1899378  | 0.2750312  | 2.7085456  |
| H  | -0.7439971 | 0.6684813  | 3.1040695  |
| Pt | 0.6955105  | 3.5896046  | 6.8456804  |
| P  | -0.7371424 | 4.8700928  | 5.6518746  |
| N  | -0.0049577 | 1.7146224  | 6.5128830  |
| N  | -0.8982003 | 1.1262875  | 5.7007437  |
| N  | 1.8654289  | 2.4738489  | 8.1120978  |
| N  | 1.8733238  | 5.0104449  | 7.6600691  |
| N  | 2.0766693  | 6.3184978  | 7.4858341  |
| C  | -0.8045238 | -0.1939155 | 5.9993072  |
| C  | 0.5958060  | 0.7310361  | 7.2643870  |
| C  | 1.6444983  | 1.1409198  | 8.1778802  |
| C  | 2.4205355  | 0.3605027  | 9.0394550  |
| H  | 2.2737651  | -0.7174333 | 9.0620460  |
| C  | 3.3960024  | 1.0016526  | 9.8089092  |
| C  | 3.5898474  | 2.3854395  | 9.7363270  |
| H  | 4.3447550  | 2.8996202  | 10.3273210 |
| C  | 2.7878077  | 3.1230619  | 8.8596768  |
| C  | 2.7928206  | 4.5453174  | 8.5785291  |
| C  | 3.1101573  | 6.6107412  | 8.3144257  |
| C  | -2.4952718 | 4.4234624  | 5.9198330  |
| C  | -2.8708913 | 3.3992215  | 6.7974156  |
| H  | -2.1087894 | 2.8384520  | 7.3340794  |
| C  | -4.2219532 | 3.0933395  | 6.9825662  |
| H  | -4.5020517 | 2.2885495  | 7.6633249  |
| C  | -5.2051929 | 3.8094019  | 6.2983205  |
| H  | -6.2591207 | 3.5673989  | 6.4425262  |
| C  | -4.8374239 | 4.8466849  | 5.4340540  |
| H  | -5.6019659 | 5.4208838  | 4.9089460  |
| C  | -3.4906557 | 5.1546144  | 5.2490198  |
| H  | -3.2138366 | 5.9848344  | 4.5959744  |
| C  | -0.6950403 | 6.6311410  | 6.0979128  |

|   |            |            |            |
|---|------------|------------|------------|
| C | -0.9839538 | 6.9571089  | 7.4330971  |
| H | -1.2350692 | 6.1651024  | 8.1412880  |
| C | -0.9182630 | 8.2802438  | 7.8596310  |
| H | -1.1282306 | 8.5248637  | 8.9014685  |
| C | -0.5610291 | 9.2893973  | 6.9582074  |
| C | -0.2751444 | 8.9709761  | 5.6300338  |
| H | 0.0236957  | 9.7469519  | 4.9238002  |
| C | -0.3424356 | 7.6430774  | 5.1987325  |
| H | -0.0836087 | 7.4102153  | 4.1679782  |
| H | 0.3642549  | 5.3761672  | 3.5727731  |
| H | -1.3934870 | 5.2876179  | 3.3700088  |
| H | -1.0303222 | 3.1722419  | 2.4382065  |
| H | -0.7935779 | 2.6036799  | 4.0981948  |
| N | 3.5793112  | 5.5319478  | 9.0120163  |
| N | 0.1083455  | -0.4740666 | 6.9712853  |
| N | 3.9655538  | 7.3583058  | 4.8915586  |
| N | 4.5524634  | 0.3641326  | 6.6344815  |
| C | 2.4727090  | 8.8689136  | 3.5895500  |
| C | 2.9518495  | 10.0290048 | 4.2218825  |
| C | 1.5118740  | 9.0044038  | 2.5737960  |
| C | 2.4579786  | 11.2807356 | 3.8665924  |
| H | 3.6976221  | 9.9243510  | 5.0092676  |
| C | 1.0228425  | 10.2631844 | 2.2273432  |
| H | 1.1462713  | 8.1113117  | 2.0652888  |
| C | 1.4790105  | 11.4247494 | 2.8691877  |
| H | 2.8331176  | 12.1698874 | 4.3794930  |
| H | 0.2686430  | 10.3480847 | 1.4416119  |
| C | 3.6717252  | 7.9558492  | 8.4005755  |
| C | 3.0866563  | 9.0207668  | 7.6922129  |
| C | 4.8184182  | 8.2070313  | 9.1699950  |
| C | 3.6304867  | 10.2981743 | 7.7703810  |
| H | 2.2079195  | 8.8295810  | 7.0774014  |
| C | 5.3612850  | 9.4905975  | 9.2310888  |
| H | 5.2769277  | 7.3816285  | 9.7154438  |
| C | 4.7779649  | 10.5607011 | 8.5375155  |
| H | 3.1596332  | 11.1127190 | 7.2142354  |
| H | 6.2565597  | 9.6669136  | 9.8318680  |
| C | 3.3662262  | -1.7942919 | 6.1986488  |
| C | 2.3796032  | -2.4752050 | 5.4631940  |
| C | 4.1176881  | -2.5106188 | 7.1438835  |
| C | 2.1692169  | -3.8355569 | 5.6630529  |
| H | 1.7793685  | -1.9217240 | 4.7418352  |
| C | 3.8903393  | -3.8722500 | 7.3420182  |
| H | 4.8792840  | -1.9836163 | 7.7193735  |
| C | 2.9170695  | -4.5623128 | 6.6043658  |
| H | 1.3986876  | -4.3466884 | 5.0805885  |
| H | 4.4822552  | -4.4131777 | 8.0840750  |
| C | -1.5744677 | -1.2117134 | 5.2890777  |
| C | -1.2274929 | -2.5676642 | 5.4099494  |
| C | -2.6238803 | -0.8600530 | 4.4227762  |
| C | -1.8912748 | -3.5352319 | 4.6601323  |
| H | -0.4136257 | -2.8409493 | 6.0809052  |
| C | -3.2801257 | -1.8365098 | 3.6760130  |
| H | -2.9106709 | 0.1885232  | 4.3337527  |
| C | -2.9244919 | -3.1914691 | 3.7735606  |
| H | -1.5960464 | -4.5829082 | 4.7563433  |
| H | -4.0856393 | -1.5431185 | 2.9988764  |
| C | 2.6922074  | -6.0409572 | 6.7927789  |
| H | 1.6206476  | -6.2879140 | 6.7850423  |
| H | 3.1637983  | -6.6187459 | 5.9814474  |
| H | 3.1174524  | -6.3967244 | 7.7410501  |
| C | 0.9611323  | 12.7879014 | 2.4871243  |
| H | 0.7307763  | 13.3932210 | 3.3761931  |
| H | 1.7106997  | 13.3454886 | 1.9031218  |
| H | 0.0502956  | 12.7179812 | 1.8774995  |
| C | 5.3476696  | 11.9540477 | 8.6183937  |
| H | 5.4478635  | 12.4040069 | 7.6194101  |
| H | 4.6924344  | 12.6166592 | 9.2061753  |
| H | 6.3374326  | 11.9582863 | 9.0942360  |
| C | -3.6519407 | -4.2472276 | 2.9811514  |
| H | -2.9858099 | -5.0793420 | 2.7132705  |
| H | -4.4849961 | -4.6720195 | 3.5643564  |
| H | -4.0771582 | -3.8362022 | 2.0552347  |
| H | -0.4915792 | 10.3236698 | 7.2978309  |
| H | 7.2826774  | 4.7177332  | 8.1170457  |
| H | 4.0259490  | 0.4080605  | 10.4716322 |

(11)<sub>2</sub>

Energy = -8938.144854753

|    |            |            |            |
|----|------------|------------|------------|
| Pt | 3.1876995  | 3.0231251  | 5.4926125  |
| P  | 1.6193744  | 2.1227753  | 4.1412928  |
| N  | 2.9860807  | 5.0109907  | 5.1381964  |
| N  | 2.1471598  | 5.8113322  | 4.4589362  |
| N  | 4.7728760  | 3.7989863  | 6.5394082  |
| N  | 4.0036252  | 1.3503607  | 6.2799525  |
| N  | 3.6620102  | 0.0630395  | 6.3931315  |
| C  | 2.6254830  | 7.0619022  | 4.6780970  |
| C  | 3.9319932  | 5.8057887  | 5.7430455  |
| C  | 4.9482805  | 5.1406236  | 6.5345013  |
| C  | 6.0099456  | 5.6945589  | 7.2539612  |
| H  | 6.1237379  | 6.7759064  | 7.2905487  |
| C  | 6.8672905  | 4.8249434  | 7.9356667  |
| C  | 6.6829442  | 3.4388171  | 7.8958102  |
| H  | 7.3385332  | 2.7487801  | 8.4230569  |
| C  | 5.5976257  | 2.9329484  | 7.1716911  |
| C  | 5.1456959  | 1.5630769  | 7.0253955  |
| C  | 4.6156268  | -0.4683319 | 7.2000636  |
| C  | 1.7056802  | 2.7419227  | 2.4189673  |
| C  | 2.6183618  | 3.7324797  | 2.0363663  |
| H  | 3.3046558  | 4.1499154  | 2.7699489  |
| C  | 2.6453056  | 4.1885702  | 0.7156316  |
| H  | 3.3553534  | 4.9657446  | 0.4302936  |
| C  | 1.7689855  | 3.6550309  | -0.2305923 |
| H  | 1.7923570  | 4.0122983  | -1.2611741 |
| C  | 0.8664013  | 2.6525595  | 0.1417245  |
| H  | 0.1897463  | 2.2212539  | -0.5972301 |
| C  | 0.8365347  | 2.1964827  | 1.4585606  |
| H  | 0.1488535  | 1.3950778  | 1.7363684  |
| C  | -0.1211909 | 2.4275097  | 4.6365536  |
| C  | -0.3978739 | 3.9090507  | 4.9539714  |
| C  | 1.7630923  | 0.3196659  | 3.9528542  |
| C  | 2.9405024  | -0.1689614 | 3.3642138  |
| H  | 3.6945495  | 0.5314162  | 3.0002040  |
| C  | 3.1625818  | -1.5402672 | 3.2768841  |
| H  | 4.0867367  | -1.9121013 | 2.8331611  |
| C  | 2.2136288  | -2.4372982 | 3.7795370  |
| H  | 2.3991354  | -3.5110587 | 3.7309840  |
| C  | 1.0377023  | -1.9574099 | 4.3578038  |
| H  | 0.2969783  | -2.6457056 | 4.7676400  |
| C  | 0.8108035  | -0.5814783 | 4.4440869  |
| H  | -0.0965427 | -0.2294035 | 4.9296157  |
| Pt | 1.1305010  | 3.2229410  | 7.9783111  |
| P  | -0.4986496 | 4.2571084  | 6.7630697  |
| N  | 0.6317265  | 1.2483591  | 7.8740872  |
| N  | -0.3272812 | 0.4826433  | 7.3228633  |
| N  | 2.5990061  | 2.3530847  | 9.1274668  |
| N  | 2.2422941  | 4.8190116  | 8.5359964  |
| N  | 2.2241067  | 6.1314560  | 8.3104832  |
| C  | -0.0409371 | -0.7766156 | 7.7375063  |
| C  | 1.4600531  | 0.4153511  | 8.5892350  |
| C  | 2.5764187  | 1.0122125  | 9.2867744  |
| C  | 3.5762929  | 0.3808942  | 10.0246862 |
| H  | 3.5499743  | -0.6984273 | 10.1512799 |
| C  | 4.6167010  | 1.1667216  | 10.5175063 |
| C  | 4.6042283  | 2.5549654  | 10.3696120 |
| H  | 5.4074625  | 3.1734515  | 10.7599968 |
| C  | 3.5436999  | 3.1482645  | 9.6792312  |
| C  | 3.2979273  | 4.5417739  | 9.3808175  |
| C  | 3.2436860  | 6.6239446  | 9.0521345  |
| C  | -2.2327026 | 3.7742705  | 7.1711533  |
| C  | -2.6564618 | 2.4500194  | 6.9650146  |
| H  | -1.9470088 | 1.6865139  | 6.6515895  |
| C  | -3.9638450 | 2.0681396  | 7.2700540  |
| H  | -4.2644646 | 1.0299261  | 7.1215560  |
| C  | -4.8662365 | 2.9942694  | 7.7991321  |
| H  | -5.8819596 | 2.6902610  | 8.0551640  |
| C  | -4.4524080 | 4.3123780  | 8.0069974  |
| H  | -5.1464772 | 5.0461350  | 8.4193432  |
| C  | -3.1500621 | 4.7047017  | 7.6863853  |
| H  | -2.8504170 | 5.7394921  | 7.8463614  |
| C  | -0.5428067 | 6.0674133  | 6.9287902  |
| C  | -0.5075670 | 6.6111298  | 8.2240076  |
| H  | -0.3409056 | 5.9768947  | 9.0914484  |
| C  | -0.6431768 | 7.9827230  | 8.4155302  |

|    |            |            |            |
|----|------------|------------|------------|
| H  | -0.6134105 | 8.3780511  | 9.4300369  |
| C  | -0.7653067 | 8.8361625  | 7.3157336  |
| C  | -0.7626161 | 8.3083099  | 6.0240629  |
| H  | -0.8135138 | 8.9667508  | 5.1564893  |
| C  | -0.6664286 | 6.9272845  | 5.8303101  |
| H  | -0.6559661 | 6.5419780  | 4.8124632  |
| H  | 0.3875654  | 4.5748981  | 4.5566423  |
| H  | -1.3544267 | 4.2226440  | 4.5146195  |
| H  | -0.7662875 | 2.0757719  | 3.8193887  |
| H  | -0.3043991 | 1.7671011  | 5.4955711  |
| N  | 3.9411428  | 5.6602326  | 9.7297195  |
| N  | 1.0646927  | -0.8519478 | 8.5236395  |
| N  | 3.7342680  | 7.0953969  | 5.4691344  |
| N  | 5.5623732  | 0.4330258  | 7.5990079  |
| C  | 1.9815724  | 8.2499130  | 4.1237393  |
| C  | 2.2736752  | 9.5217028  | 4.6420983  |
| C  | 1.0269605  | 8.1433549  | 3.0976955  |
| C  | 1.6072754  | 10.6477608 | 4.1638978  |
| H  | 3.0155297  | 9.6079410  | 5.4362323  |
| C  | 0.3674748  | 9.2760837  | 2.6260452  |
| H  | 0.8032091  | 7.1599508  | 2.6829503  |
| C  | 0.6390260  | 10.5496998 | 3.1523193  |
| H  | 1.8387692  | 11.6274525 | 4.5888634  |
| H  | -0.3765453 | 9.1727403  | 1.8327096  |
| C  | 3.5081508  | 8.0581962  | 9.0949461  |
| C  | 2.8100553  | 8.9243147  | 8.2339018  |
| C  | 4.4229969  | 8.6073116  | 10.0043467 |
| C  | 3.0227848  | 10.2969780 | 8.2947733  |
| H  | 2.1015701  | 8.5041968  | 7.5218001  |
| C  | 4.6322248  | 9.9835535  | 10.0531103 |
| H  | 4.9377259  | 7.9452100  | 10.6982474 |
| C  | 3.9352157  | 10.8549007 | 9.2046489  |
| H  | 2.4656631  | 10.9524315 | 7.6203871  |
| H  | 5.3300746  | 10.3930865 | 10.7865714 |
| C  | 4.5111689  | -1.8266417 | 7.7305133  |
| C  | 3.4581559  | -2.6724366 | 7.3452444  |
| C  | 5.3888500  | -2.2611703 | 8.7402783  |
| C  | 3.2834601  | -3.9057261 | 7.9684799  |
| H  | 2.7606947  | -2.3377297 | 6.5781926  |
| C  | 5.1941546  | -3.4893180 | 9.3658156  |
| H  | 6.2016477  | -1.6022134 | 9.0479261  |
| C  | 4.1305739  | -4.3313334 | 9.0018109  |
| H  | 2.4521514  | -4.5444833 | 7.6606363  |
| H  | 5.8717509  | -3.7994383 | 10.1649842 |
| C  | -0.8307410 | -1.9433198 | 7.3587664  |
| C  | -0.4315038 | -3.2212826 | 7.7885438  |
| C  | -1.9708155 | -1.8332714 | 6.5461158  |
| C  | -1.1465318 | -4.3501555 | 7.4002524  |
| H  | 0.4495806  | -3.3031223 | 8.4250775  |
| C  | -2.6814058 | -2.9708983 | 6.1656847  |
| H  | -2.2921228 | -0.8472750 | 6.2079098  |
| C  | -2.2844191 | -4.2507758 | 6.5821406  |
| H  | -0.8213572 | -5.3348818 | 7.7440253  |
| H  | -3.5646669 | -2.8652972 | 5.5315654  |
| C  | 3.8851754  | -5.6218266 | 9.7384850  |
| H  | 3.3962268  | -5.4243950 | 10.7060011 |
| H  | 3.2301199  | -6.2948621 | 9.1683071  |
| H  | 4.8250845  | -6.1528525 | 9.9486553  |
| C  | -0.0604917 | 11.7744860 | 2.6200380  |
| H  | -0.1236478 | 12.5652334 | 3.3804523  |
| H  | 0.4818722  | 12.1930099 | 1.7569581  |
| H  | -1.0801508 | 11.5419059 | 2.2822292  |
| C  | 4.1123873  | 12.3478364 | 9.2990313  |
| H  | 4.1045633  | 12.8201088 | 8.3060271  |
| H  | 3.2944676  | 12.8015183 | 9.8821759  |
| H  | 5.0550120  | 12.6136091 | 9.7970842  |
| C  | -3.0792502 | -5.4759902 | 6.2119240  |
| H  | -2.4249788 | -6.3388678 | 6.0229724  |
| H  | -3.7623242 | -5.7585773 | 7.0296285  |
| H  | -3.6916470 | -5.3066121 | 5.3158561  |
| H  | -0.8355365 | 9.9146206  | 7.4644383  |
| H  | 7.6910851  | 5.2379040  | 8.5183822  |
| H  | 5.4529642  | 0.6904034  | 11.0226069 |
| Pt | 0.2049984  | 2.9791302  | 15.3439700 |
| P  | 1.2351646  | 1.3468487  | 16.5138324 |
| N  | 1.1841037  | 4.6471362  | 15.9576215 |
| N  | 2.2574928  | 4.9392971  | 16.7109647 |

|    |            |            |            |
|----|------------|------------|------------|
| N  | -0.8986165 | 4.4635781  | 14.4559538 |
| N  | -1.1942010 | 1.9026844  | 14.3614006 |
| N  | -1.3998045 | 0.6153720  | 14.0669742 |
| C  | 2.3363136  | 6.2932356  | 16.6718770 |
| C  | 0.6604215  | 5.8303715  | 15.4905482 |
| C  | -0.5156060 | 5.7473272  | 14.6468555 |
| C  | -1.2418181 | 6.7753369  | 14.0405537 |
| H  | -0.9072981 | 7.8042412  | 14.1535610 |
| C  | -2.3583928 | 6.4279443  | 13.2733871 |
| C  | -2.7520779 | 5.0943134  | 13.1196657 |
| H  | -3.6158202 | 4.8073883  | 12.5236668 |
| C  | -1.9854069 | 4.0995055  | 13.7366747 |
| C  | -2.1309933 | 2.6577868  | 13.6844580 |
| C  | -2.4647161 | 0.6287631  | 13.2253195 |
| C  | 1.3682548  | 1.7121615  | 18.3044859 |
| C  | 0.9124400  | 2.9206405  | 18.8457023 |
| H  | 0.4673997  | 3.6712223  | 18.1963848 |
| C  | 1.0333240  | 3.1646055  | 20.2164836 |
| H  | 0.6800974  | 4.1112892  | 20.6269814 |
| C  | 1.6030209  | 2.2044426  | 21.0542377 |
| H  | 1.6958382  | 2.3971057  | 22.1240804 |
| C  | 2.0463317  | 0.9885801  | 20.5215818 |
| H  | 2.4786109  | 0.2286353  | 21.1740189 |
| C  | 1.9267108  | 0.7424238  | 19.1548155 |
| H  | 2.2481706  | -0.2194472 | 18.7498394 |
| C  | 2.9590802  | 0.9811763  | 16.0019109 |
| C  | 3.8187331  | 2.2525819  | 15.8733755 |
| C  | 0.3609601  | -0.2471306 | 16.4697140 |
| C  | -0.9292129 | -0.2833613 | 17.0225391 |
| H  | -1.3398567 | 0.6100041  | 17.4967002 |
| C  | -1.6960472 | -1.4418356 | 16.9348696 |
| H  | -2.7037313 | -1.4568176 | 17.3514473 |
| C  | -1.1839524 | -2.5744642 | 16.2922678 |
| H  | -1.7942612 | -3.4741210 | 16.2044426 |
| C  | 0.1012812  | -2.5468272 | 15.7490892 |
| H  | 0.5066219  | -3.4181343 | 15.2319918 |
| C  | 0.8740132  | -1.3858668 | 15.8371622 |
| H  | 1.8589152  | -1.3753048 | 15.3759117 |
| Pt | 2.2175171  | 2.6559397  | 12.8323709 |
| P  | 4.0941892  | 2.7669630  | 14.1229492 |
| N  | 1.8667483  | 0.6556047  | 12.6598295 |
| N  | 2.4125362  | -0.4985828 | 13.0834022 |
| N  | 0.5553690  | 2.6199312  | 11.6196137 |
| N  | 1.8671329  | 4.6239418  | 12.5241306 |
| N  | 2.4083874  | 5.7716531  | 12.9269036 |
| C  | 1.6513569  | -1.4663372 | 12.5144318 |
| C  | 0.7936397  | 0.3334322  | 11.8623367 |
| C  | 0.0366670  | 1.4195222  | 11.2814227 |
| C  | -1.1119922 | 1.3540159  | 10.4939277 |
| H  | -1.5230708 | 0.3844074  | 10.2243377 |
| C  | -1.7285766 | 2.5527714  | 10.1393118 |
| C  | -1.1572892 | 3.7829326  | 10.4705338 |
| H  | -1.6277852 | 4.7205476  | 10.1880951 |
| C  | 0.0317302  | 3.7964902  | 11.2054651 |
| C  | 0.8136166  | 4.9165191  | 11.6814064 |
| C  | 1.6963507  | 6.7315922  | 12.2918581 |
| C  | 5.4915119  | 1.6789742  | 13.6014018 |
| C  | 5.3357050  | 0.2823009  | 13.6229306 |
| H  | 4.3708542  | -0.1621261 | 13.8603599 |
| C  | 6.3811441  | -0.5539985 | 13.2281375 |
| H  | 6.2302674  | -1.6347241 | 13.2320411 |
| C  | 7.5934883  | -0.0136498 | 12.7919480 |
| H  | 8.4029067  | -0.6677552 | 12.4650434 |
| C  | 7.7564580  | 1.3735994  | 12.7686463 |
| H  | 8.6980332  | 1.8095657  | 12.4317185 |
| C  | 6.7195739  | 2.2150002  | 13.1798845 |
| H  | 6.8704528  | 3.2937253  | 13.1638001 |
| C  | 4.8756246  | 4.4075352  | 14.1954421 |
| C  | 5.1040464  | 5.0825645  | 12.9846219 |
| H  | 4.7155395  | 4.6927249  | 12.0464035 |
| C  | 5.7980019  | 6.2884379  | 12.9708169 |
| H  | 5.9661502  | 6.7881440  | 12.0178751 |
| C  | 6.2285701  | 6.8638758  | 14.1694597 |
| C  | 5.9695600  | 6.2204171  | 15.3804175 |
| H  | 6.2605814  | 6.6805551  | 16.3253215 |
| C  | 5.3084306  | 4.9886043  | 15.3937406 |
| H  | 5.1097484  | 4.5127441  | 16.3522258 |

|   |            |            |            |
|---|------------|------------|------------|
| H | 3.3620533  | 3.1190119  | 16.3819185 |
| H | 4.8108746  | 2.0907086  | 16.3167646 |
| H | 3.3895301  | 0.2906330  | 16.7406780 |
| H | 2.8760503  | 0.4272198  | 15.0563058 |
| N | 0.6882719  | 6.2361905  | 11.5094602 |
| N | 0.6367911  | -0.9819073 | 11.7513514 |
| N | 1.3588004  | 6.8793777  | 15.9254082 |
| N | -2.9536838 | 1.8810303  | 12.9778476 |
| C | 3.3959887  | 7.0308491  | 17.3546281 |
| C | 3.6598419  | 8.3676626  | 17.0162629 |
| C | 4.2019141  | 6.4093026  | 18.3242638 |
| C | 4.7188837  | 9.0494512  | 17.6122781 |
| H | 3.0348237  | 8.8532760  | 16.2670226 |
| C | 5.2568787  | 7.1007929  | 18.9148591 |
| H | 3.9948215  | 5.3747701  | 18.6000266 |
| C | 5.5413897  | 8.4319872  | 18.5673814 |
| H | 4.9180038  | 10.0847680 | 17.3254086 |
| H | 5.8769846  | 6.5981472  | 19.6607625 |
| C | 2.0357515  | 8.1406405  | 12.4588622 |
| C | 3.0087336  | 8.5180498  | 13.4022777 |
| C | 1.4365625  | 9.1368031  | 11.6751916 |
| C | 3.3692145  | 9.8531987  | 13.5434643 |
| H | 3.4740420  | 7.7501002  | 14.0181098 |
| C | 1.8021034  | 10.4723910 | 11.8283888 |
| H | 0.7075018  | 8.8464009  | 10.9208009 |
| C | 2.7759738  | 10.8566394 | 12.7604677 |
| H | 4.1312633  | 10.1241956 | 14.2786824 |
| H | 1.3413945  | 11.2301440 | 11.1911777 |
| C | -2.9096203 | -0.5714757 | 12.5193817 |
| C | -2.3004144 | -1.8150928 | 12.7533275 |
| C | -3.8678448 | -0.4732756 | 11.4940333 |
| C | -2.6310486 | -2.9184921 | 11.9695872 |
| H | -1.5420974 | -1.8982078 | 13.5311962 |
| C | -4.1781183 | -1.5793554 | 10.7084010 |
| H | -4.3350197 | 0.4934359  | 11.3037434 |
| C | -3.5574485 | -2.8215686 | 10.9216527 |
| H | -2.1380065 | -3.8742167 | 12.1613698 |
| H | -4.9072448 | -1.4780151 | 9.9009625  |
| C | 1.8831200  | -2.8914139 | 12.7229686 |
| C | 1.0154039  | -3.8293407 | 12.1360710 |
| C | 2.9362794  | -3.3600261 | 13.5253133 |
| C | 1.1921841  | -5.1910885 | 12.3627462 |
| H | 0.2039872  | -3.4627069 | 11.5071101 |
| C | 3.1057160  | -4.7264516 | 13.7434463 |
| H | 3.6178378  | -2.6426509 | 13.9845462 |
| C | 2.2388299  | -5.6689069 | 13.1693205 |
| H | 0.5087219  | -5.9048356 | 11.8971776 |
| H | 3.9287002  | -5.0715581 | 14.3733735 |
| C | -3.8504279 | -3.9907320 | 10.0181621 |
| H | -3.4637148 | -4.9304529 | 10.4351031 |
| H | -4.9310269 | -4.1087895 | 9.8484324  |
| H | -3.3767687 | -3.8449383 | 9.0343716  |
| C | 6.6715224  | 9.1803796  | 19.2268760 |
| H | 7.0295901  | 10.0072155 | 18.5978269 |
| H | 6.3485365  | 9.6148247  | 20.1867440 |
| H | 7.5227377  | 8.5184291  | 19.4401275 |
| C | 3.2167551  | 12.2913009 | 12.8880339 |
| H | 3.3690917  | 12.5752150 | 13.9395062 |
| H | 4.1729858  | 12.4537245 | 12.3646525 |
| H | 2.4828602  | 12.9818738 | 12.4503805 |
| C | 2.4530168  | -7.1476756 | 13.3627397 |
| H | 1.4985558  | -7.6861401 | 13.4474919 |
| H | 2.9934625  | -7.5777370 | 12.5036397 |
| H | 3.0470576  | -7.3564420 | 14.2628474 |
| H | 6.7418470  | 7.8264620  | 14.1622941 |
| H | -2.9280897 | 7.2136591  | 12.7768509 |
| H | -2.6705087 | 2.5291509  | 9.5975259  |

**14**

Energy = -5388.375347703

|    |           |           |           |
|----|-----------|-----------|-----------|
| Pt | 2.8427293 | 3.4543156 | 4.5046584 |
| P  | 1.3159903 | 2.8885036 | 2.9346334 |
| N  | 2.9557068 | 5.4684347 | 4.2996587 |
| N  | 2.2786041 | 6.4320162 | 3.6556271 |
| N  | 4.3836168 | 3.9203821 | 5.7771721 |
| N  | 3.3252001 | 1.6364222 | 5.2369802 |
| N  | 2.8418550 | 0.3952828 | 5.1492940 |

|    |            |            |            |
|----|------------|------------|------------|
| C  | 2.8929773  | 7.5830215  | 4.0307842  |
| C  | 3.9472467  | 6.0717002  | 5.0395907  |
| C  | 4.7661912  | 5.2138771  | 5.8716825  |
| C  | 5.8051675  | 5.5673548  | 6.7344580  |
| H  | 6.0885211  | 6.6098800  | 6.8555717  |
| C  | 6.3964298  | 4.5415871  | 7.4784124  |
| C  | 6.0111474  | 3.2011280  | 7.3483203  |
| H  | 6.4774169  | 2.4065726  | 7.9255123  |
| C  | 4.9744849  | 2.9118270  | 6.4578313  |
| C  | 4.3575936  | 1.6361327  | 6.1547167  |
| C  | 3.6045557  | -0.3247805 | 6.0109807  |
| C  | 1.6187183  | 3.6964429  | 1.3164507  |
| C  | 2.7203519  | 4.5349203  | 1.1058683  |
| H  | 3.4147100  | 4.7332840  | 1.9193844  |
| C  | 2.9282746  | 5.1195004  | -0.1461942 |
| H  | 3.7865122  | 5.7753182  | -0.2974814 |
| C  | 2.0421223  | 4.8695748  | -1.1950417 |
| H  | 2.2052463  | 5.3292856  | -2.1708294 |
| C  | 0.9493198  | 4.0186904  | -0.9962543 |
| H  | 0.2625560  | 3.8060774  | -1.8167211 |
| C  | 0.7419022  | 3.4313875  | 0.2506842  |
| H  | -0.0951483 | 2.7436232  | 0.3878331  |
| C  | -0.4207644 | 3.3284836  | 3.3396007  |
| C  | -0.5291861 | 4.7841279  | 3.8349327  |
| C  | 1.3234546  | 1.1207690  | 2.5146401  |
| C  | 2.5349502  | 0.5840291  | 2.0489666  |
| H  | 3.4076850  | 1.2308658  | 1.9417608  |
| C  | 2.6316861  | -0.7734898 | 1.7581270  |
| H  | 3.5798155  | -1.1876939 | 1.4134584  |
| C  | 1.5207850  | -1.6072467 | 1.9313222  |
| H  | 1.6027796  | -2.6745496 | 1.7211127  |
| C  | 0.3140527  | -1.0780913 | 2.3907545  |
| H  | -0.5513951 | -1.7228926 | 2.5477039  |
| C  | 0.2136610  | 0.2854413  | 2.6819740  |
| H  | -0.7258251 | 0.6735968  | 3.0697038  |
| Pt | 0.6822480  | 3.5661829  | 6.8482051  |
| P  | -0.7437601 | 4.8563372  | 5.6580055  |
| N  | -0.0196669 | 1.6944816  | 6.4999995  |
| N  | -0.9060515 | 1.1111438  | 5.6772391  |
| N  | 1.8517361  | 2.4390479  | 8.1023133  |
| N  | 1.8687073  | 4.9764246  | 7.6707957  |
| N  | 2.0816579  | 6.2834081  | 7.5020393  |
| C  | -0.8071235 | -0.2126217 | 5.9606833  |
| C  | 0.5817129  | 0.7038346  | 7.2427063  |
| C  | 1.6325986  | 1.1059247  | 8.1554221  |
| C  | 2.4189262  | 0.3072639  | 8.9875663  |
| H  | 2.2851139  | -0.7715477 | 9.0001842  |
| C  | 3.4198763  | 0.9445658  | 9.7276137  |
| C  | 3.6173176  | 2.3307638  | 9.6858784  |
| H  | 4.3950493  | 2.8222068  | 10.2647359 |
| C  | 2.7888796  | 3.0748105  | 8.8423461  |
| C  | 2.7958973  | 4.4991812  | 8.5764650  |
| C  | 3.1280598  | 6.5625222  | 8.3204170  |
| C  | -2.5034352 | 4.4119539  | 5.9186628  |
| C  | -2.8851222 | 3.3819638  | 6.7869299  |
| H  | -2.1268973 | 2.8117744  | 7.3191135  |
| C  | -4.2380354 | 3.0826582  | 6.9694104  |
| H  | -4.5235317 | 2.2739702  | 7.6433069  |
| C  | -5.2168349 | 3.8106854  | 6.2914909  |
| H  | -6.2721472 | 3.5737470  | 6.4337935  |
| C  | -4.8428779 | 4.8533601  | 5.4364807  |
| H  | -5.6039981 | 5.4368501  | 4.9167567  |
| C  | -3.4943342 | 5.1550268  | 5.2543171  |
| H  | -3.2124025 | 5.9901194  | 4.6096380  |
| C  | -0.6991794 | 6.6133370  | 6.1194222  |
| C  | -0.9789379 | 6.9267051  | 7.4596703  |
| H  | -1.2199312 | 6.1277499  | 8.1635472  |
| C  | -0.9176204 | 8.2466350  | 7.8965887  |
| H  | -1.1205048 | 8.4815048  | 8.9420829  |
| C  | -0.5739957 | 9.2652555  | 7.0004656  |
| C  | -0.2961711 | 8.9592288  | 5.6677260  |
| H  | -0.0084425 | 9.7429654  | 4.9656163  |
| C  | -0.3591718 | 7.6345293  | 5.2259535  |
| H  | -0.1090218 | 7.4120660  | 4.1907149  |
| H  | 0.3639831  | 5.3825411  | 3.5868670  |
| H  | -1.3915917 | 5.2876521  | 3.3766636  |
| H  | -1.0238020 | 3.1810847  | 2.4334525  |

|    |            |            |            |
|----|------------|------------|------------|
| H  | -0.7766678 | 2.5995044  | 4.0866652  |
| N  | 3.5959692  | 5.4760942  | 9.0058138  |
| N  | 0.1022367  | -0.4997873 | 6.9332960  |
| N  | 3.9377842  | 7.3946975  | 4.8841505  |
| N  | 4.5583527  | 0.4151627  | 6.6523309  |
| Cl | 7.6315635  | 4.9501442  | 8.6270967  |
| Cl | 4.4757332  | -0.0229262 | 10.7078511 |
| C  | 2.4241962  | 8.8968621  | 3.5992787  |
| C  | 2.8942006  | 10.0546962 | 4.2423417  |
| C  | 1.4542603  | 9.0321144  | 2.5923477  |
| C  | 2.3843209  | 11.3045953 | 3.9042227  |
| H  | 3.6456623  | 9.9489502  | 5.0242612  |
| C  | 0.9487854  | 10.2890721 | 2.2635454  |
| H  | 1.0938405  | 8.1408077  | 2.0771734  |
| C  | 1.3973438  | 11.4483580 | 2.9147157  |
| H  | 2.7529164  | 12.1921449 | 4.4243741  |
| H  | 0.1876453  | 10.3746395 | 1.4846282  |
| C  | 3.7169086  | 7.8965383  | 8.3932764  |
| C  | 3.1148855  | 8.9811663  | 7.7311011  |
| C  | 4.9172747  | 8.1105662  | 9.0894438  |
| C  | 3.6953460  | 10.2438201 | 7.7835437  |
| H  | 2.1955078  | 8.8170443  | 7.1695601  |
| C  | 5.4962836  | 9.3789559  | 9.1224958  |
| H  | 5.3941743  | 7.2682649  | 9.5918835  |
| C  | 4.8969382  | 10.4695699 | 8.4757008  |
| H  | 3.2115309  | 11.0751981 | 7.2647691  |
| H  | 6.4352586  | 9.5257614  | 9.6609629  |
| C  | 3.3669008  | -1.7447715 | 6.2525610  |
| C  | 2.4403092  | -2.4585329 | 5.4719771  |
| C  | 4.0304490  | -2.4124950 | 7.2947009  |
| C  | 2.2030212  | -3.8059468 | 5.7234776  |
| H  | 1.9046959  | -1.9402829 | 4.6769160  |
| C  | 3.7726659  | -3.7598960 | 7.5452897  |
| H  | 4.7390662  | -1.8579021 | 7.9109543  |
| C  | 2.8594528  | -4.4838600 | 6.7642857  |
| H  | 1.4813659  | -4.3448342 | 5.1044339  |
| H  | 4.2900894  | -4.2611681 | 8.3664818  |
| C  | -1.5646563 | -1.2281705 | 5.2345287  |
| C  | -1.1978537 | -2.5802894 | 5.3364193  |
| C  | -2.6178265 | -0.8783929 | 4.3725444  |
| C  | -1.8484788 | -3.5464335 | 4.5739041  |
| H  | -0.3786440 | -2.8505743 | 6.0021314  |
| C  | -3.2612762 | -1.8537158 | 3.6130344  |
| H  | -2.9182888 | 0.1673607  | 4.2971982  |
| C  | -2.8873063 | -3.2049300 | 3.6929402  |
| H  | -1.5379436 | -4.5908240 | 4.6553017  |
| H  | -4.0713382 | -1.5622153 | 2.9405363  |
| C  | 2.5994555  | -5.9472722 | 7.0161533  |
| H  | 1.5270550  | -6.1814072 | 6.9487935  |
| H  | 3.1153511  | -6.5744796 | 6.2714536  |
| H  | 2.9538626  | -6.2550559 | 8.0090530  |
| C  | 0.8638633  | 12.8096590 | 2.5490073  |
| H  | 0.6435858  | 13.4086231 | 3.4448242  |
| H  | 1.6009832  | 13.3746195 | 1.9563765  |
| H  | -0.0556519 | 12.7368418 | 1.9529497  |
| C  | 5.5071329  | 11.8469656 | 8.5296729  |
| H  | 5.5184604  | 12.3193983 | 7.5362631  |
| H  | 4.9307123  | 12.5089134 | 9.1956690  |
| H  | 6.5389897  | 11.8172012 | 8.9042086  |
| C  | -3.6003748 | -4.2604011 | 2.8874877  |
| H  | -2.9227751 | -5.0799752 | 2.6099396  |
| H  | -4.4275229 | -4.7032360 | 3.4655615  |
| H  | -4.0309788 | -3.8436442 | 1.9666971  |
| H  | -0.5100094 | 10.2974810 | 7.3473905  |

**(14)<sub>2</sub>**

Energy = -10776.82804104

|    |           |           |           |
|----|-----------|-----------|-----------|
| Pt | 3.1692909 | 3.2284026 | 5.0232002 |
| P  | 1.5680173 | 2.8871330 | 3.4585806 |
| N  | 3.4409121 | 5.2417382 | 4.9638410 |
| N  | 2.8336080 | 6.3081962 | 4.4208608 |
| N  | 4.8077321 | 3.4679431 | 6.2374674 |
| N  | 3.5371517 | 1.3261473 | 5.5964656 |
| N  | 2.9348093 | 0.1419809 | 5.4699351 |
| C  | 3.5638211 | 7.3702782 | 4.8524977 |
| C  | 4.5105497 | 5.6991031 | 5.7010231 |
| C  | 5.2892972 | 4.7170226 | 6.4223071 |



|    |            |            |            |
|----|------------|------------|------------|
| C  | 6.3776625  | 4.9221613  | 7.2703079  |
| H  | 6.7459568  | 5.9273763  | 7.4540192  |
| C  | 6.9184100  | 3.7981753  | 7.9023304  |
| C  | 6.4403676  | 2.5033123  | 7.6717601  |
| H  | 6.8562323  | 1.6323655  | 8.1728699  |
| C  | 5.3524498  | 2.3656153  | 6.8021864  |
| C  | 4.6238250  | 1.1712488  | 6.4364007  |
| C  | 3.6800386  | -0.6986835 | 6.2349306  |
| C  | 1.9375246  | 3.7424111  | 1.8782955  |
| C  | 3.0733856  | 4.5448260  | 1.7168144  |
| H  | 3.7701378  | 4.6725774  | 2.5423432  |
| C  | 3.3133113  | 5.1855393  | 0.4981674  |
| H  | 4.1984296  | 5.8130216  | 0.3863633  |
| C  | 2.4255331  | 5.0265462  | -0.5667105 |
| H  | 2.6133510  | 5.5297827  | -1.5162295 |
| C  | 1.2984086  | 4.2108150  | -0.4181905 |
| H  | 0.6090718  | 4.0691916  | -1.2517296 |
| C  | 1.0583130  | 3.5691718  | 0.7954814  |
| H  | 0.1925321  | 2.9108717  | 0.8937303  |
| C  | -0.1289778 | 3.4576686  | 3.8653502  |
| C  | -0.1354100 | 4.9167649  | 4.3655615  |
| C  | 1.4051822  | 1.1472144  | 2.9567854  |
| C  | 2.5240663  | 0.5463405  | 2.3575415  |
| H  | 3.4283288  | 1.1339016  | 2.1878743  |
| C  | 2.4900675  | -0.7997877 | 2.0053865  |
| H  | 3.3666158  | -1.2639132 | 1.5518227  |
| C  | 1.3400465  | -1.5585956 | 2.2510866  |
| H  | 1.3207841  | -2.6177529 | 1.9911291  |
| C  | 0.2254346  | -0.9662012 | 2.8461755  |
| H  | -0.6681846 | -1.5539040 | 3.0610586  |
| C  | 0.2562555  | 0.3855636  | 3.2001101  |
| H  | -0.6099398 | 0.8199197  | 3.6953498  |
| Pt | 0.8413394  | 3.6297703  | 7.3364608  |
| P  | -0.5462234 | 4.9689216  | 6.1545268  |
| N  | 0.1294708  | 1.7655264  | 6.9700719  |
| N  | -0.8276498 | 1.2036467  | 6.2158837  |
| N  | 2.1354059  | 2.4745667  | 8.4291627  |
| N  | 2.0835485  | 5.0127564  | 8.0808152  |
| N  | 2.2182514  | 6.3296103  | 7.9563211  |
| C  | -0.7166420 | -0.1257483 | 6.4680201  |
| C  | 0.7924604  | 0.7582740  | 7.6323811  |
| C  | 1.9289385  | 1.1370352  | 8.4464430  |
| C  | 2.7938374  | 0.3124932  | 9.1639096  |
| H  | 2.6516018  | -0.7651391 | 9.1722378  |
| C  | 3.8620027  | 0.9253552  | 9.8239408  |
| C  | 4.0524667  | 2.3154612  | 9.8121543  |
| H  | 4.8994734  | 2.7683166  | 10.3188744 |
| C  | 3.1517565  | 3.0935125  | 9.0764372  |
| C  | 3.1203818  | 4.5289216  | 8.8531573  |
| C  | 3.3417221  | 6.6212096  | 8.6563803  |
| C  | -2.3210243 | 4.5299069  | 6.2001335  |
| C  | -2.7950112 | 3.5007519  | 7.0169870  |
| H  | -2.0978414 | 2.9175675  | 7.6110245  |
| C  | -4.1588628 | 3.2019341  | 7.0559598  |
| H  | -4.5117274 | 2.3972598  | 7.7015897  |
| C  | -5.0572934 | 3.9283297  | 6.2739564  |
| H  | -6.1223483 | 3.6937324  | 6.3021564  |
| C  | -4.5910160 | 4.9660135  | 5.4581409  |
| C  | -5.2904105 | 5.5449307  | 4.8533142  |
| C  | -3.2315065 | 5.2704835  | 5.4260234  |
| H  | -2.8807349 | 6.1034267  | 4.8135959  |
| C  | -0.5784802 | 6.7254814  | 6.6228701  |
| C  | -1.3346637 | 7.1047919  | 7.7432467  |
| H  | -1.8747210 | 6.3558480  | 8.3251613  |
| C  | -1.3986811 | 8.4461645  | 8.1151425  |
| H  | -1.9976035 | 8.7364070  | 8.9794607  |
| C  | -0.6898151 | 9.4117003  | 7.3932413  |
| C  | 0.0811646  | 9.0335183  | 6.2923849  |
| H  | 0.6594837  | 9.7727292  | 5.7364967  |
| C  | 0.1334095  | 7.6935755  | 5.9046631  |
| H  | 0.7565261  | 7.4077708  | 5.0605832  |
| H  | 0.8383827  | 5.4159252  | 4.2353677  |
| H  | -0.8774022 | 5.5183114  | 3.8236331  |
| H  | -0.7383850 | 3.3515333  | 2.9580145  |
| H  | -0.5409282 | 2.7545092  | 4.6071484  |
| N  | 3.9329698  | 5.5273891  | 9.2266323  |
| N  | 0.2746057  | -0.4366020 | 7.3483299  |

|    |            |            |            |
|----|------------|------------|------------|
| N  | 4.6167682  | 7.0258735  | 5.6422926  |
| N  | 4.7424314  | -0.0938260 | 6.8419289  |
| Cl | 8.2070440  | 4.0343528  | 9.0460753  |
| Cl | 4.9873147  | -0.0684900 | 10.6739301 |
| C  | 3.2032511  | 8.7506253  | 4.5391419  |
| C  | 3.7191347  | 9.7994385  | 5.3159895  |
| C  | 2.2962367  | 9.0537880  | 3.5081478  |
| C  | 3.3173633  | 11.1124006 | 5.0803962  |
| H  | 4.4089902  | 9.5678090  | 6.1266208  |
| C  | 1.9044343  | 10.3704617 | 3.2797342  |
| H  | 1.8955726  | 8.2441997  | 2.8970743  |
| C  | 2.4027806  | 11.4252371 | 4.0636682  |
| H  | 3.7114255  | 11.9096443 | 5.7146234  |
| H  | 1.1914651  | 10.5880614 | 2.4813372  |
| C  | 3.8159841  | 7.9999733  | 8.7382347  |
| C  | 2.9037856  | 9.0506154  | 8.5588991  |
| C  | 5.1651213  | 8.3133687  | 8.9584965  |
| C  | 3.3267386  | 10.3730806 | 8.6307800  |
| H  | 1.8570712  | 8.8165225  | 8.3775789  |
| C  | 5.5802860  | 9.6410844  | 9.0316508  |
| H  | 5.8903887  | 7.5045227  | 9.0478833  |
| C  | 4.6671159  | 10.6971961 | 8.8789084  |
| H  | 2.5950500  | 11.1716036 | 8.4925860  |
| H  | 6.6365636  | 9.8649965  | 9.1980064  |
| C  | 3.3089542  | -2.0955270 | 6.4416684  |
| C  | 2.2971314  | -2.6919423 | 5.6728528  |
| C  | 3.9235755  | -2.8501974 | 7.4557072  |
| C  | 1.9277504  | -4.0145402 | 5.9044279  |
| H  | 1.7950067  | -2.1030604 | 4.9060187  |
| C  | 3.5337906  | -4.1668376 | 7.6881825  |
| H  | 4.6950733  | -2.3819549 | 8.0683972  |
| C  | 2.5329294  | -4.7768913 | 6.9147435  |
| H  | 1.1368080  | -4.4604058 | 5.2966286  |
| H  | 4.0091378  | -4.7324842 | 8.4927120  |
| C  | -1.5577611 | -1.1126938 | 5.7990752  |
| C  | -1.2649260 | -2.4812224 | 5.9094729  |
| C  | -2.6286381 | -0.7150848 | 4.9789701  |
| C  | -2.0021390 | -3.4195607 | 5.1909211  |
| H  | -0.4349078 | -2.7895140 | 6.5442628  |
| C  | -3.3582654 | -1.6623803 | 4.2647316  |
| H  | -2.8713663 | 0.3453465  | 4.8996357  |
| C  | -3.0563621 | -3.0317866 | 4.3493091  |
| H  | -1.7491492 | -4.4789983 | 5.2780636  |
| H  | -4.1791521 | -1.3350625 | 3.6223366  |
| C  | 2.1361820  | -6.2110489 | 7.1558975  |
| H  | 1.1463766  | -6.4319210 | 6.7330321  |
| H  | 2.8562685  | -6.9037900 | 6.6910728  |
| H  | 2.1088843  | -6.4443149 | 8.2299315  |
| C  | 1.9799465  | 12.8479321 | 3.8002264  |
| H  | 2.1971880  | 13.4981298 | 4.6583536  |
| H  | 2.5114999  | 13.2623564 | 2.9286327  |
| H  | 0.9038006  | 12.9139175 | 3.5836214  |
| C  | 5.1121347  | 12.1319498 | 8.9992533  |
| H  | 6.1045929  | 12.2873390 | 8.5518782  |
| H  | 4.4045380  | 12.8140401 | 8.5077686  |
| H  | 5.1823395  | 12.4370079 | 10.0562181 |
| C  | -3.8634558 | -4.0513063 | 3.5868880  |
| H  | -3.2861358 | -4.9681976 | 3.4045804  |
| H  | -4.7664726 | -4.3393944 | 4.1493438  |
| H  | -4.1973764 | -3.6573682 | 2.6167031  |
| H  | -0.7282976 | 10.4580357 | 7.6991382  |
| Pt | 0.7901280  | 3.1917227  | 15.2649296 |
| P  | 2.0211404  | 1.9592963  | 16.6965804 |
| N  | 1.5678905  | 5.0420628  | 15.5119705 |
| N  | 2.6443721  | 5.5816592  | 16.1037292 |
| N  | -0.4900362 | 4.3318311  | 14.1409703 |
| N  | -0.4598943 | 1.7885477  | 14.5370525 |
| N  | -0.5180941 | 0.4552479  | 14.5332699 |
| C  | 2.5667849  | 6.9018958  | 15.7968482 |
| C  | 0.8866418  | 6.0496007  | 14.8657305 |
| C  | -0.2811865 | 5.6675085  | 14.0953663 |
| C  | -1.1152631 | 6.4685870  | 13.3115316 |
| H  | -0.9258891 | 7.5352932  | 13.2209283 |
| C  | -2.1201060 | 5.8253340  | 12.5829644 |
| C  | -2.3497524 | 4.4466148  | 12.6705792 |
| H  | -3.1357041 | 3.9535304  | 12.1044427 |
| C  | -1.4948819 | 3.7026585  | 13.4883239 |

|    |            |            |            |
|----|------------|------------|------------|
| C  | -1.4573261 | 2.2703295  | 13.7124501 |
| C  | -1.5608576 | 0.1664247  | 13.7135726 |
| C  | 2.2151374  | 2.7342685  | 18.3454655 |
| C  | 1.6111447  | 3.9582516  | 18.6581626 |
| H  | 1.0112376  | 4.4735139  | 17.9107617 |
| C  | 1.7818882  | 4.5219021  | 19.9251587 |
| H  | 1.3133957  | 5.4796485  | 20.1549112 |
| C  | 2.5506466  | 3.8665462  | 20.8883218 |
| H  | 2.6855036  | 4.3102895  | 21.8758252 |
| C  | 3.1411540  | 2.6338957  | 20.5887219 |
| H  | 3.7304264  | 2.1097040  | 21.3423054 |
| C  | 2.9706167  | 2.0691760  | 19.3258773 |
| H  | 3.4115560  | 1.0935542  | 19.1094179 |
| C  | 3.7332430  | 1.6141382  | 16.1450372 |
| C  | 4.4795989  | 2.8806147  | 15.6886744 |
| C  | 1.2918060  | 0.3361279  | 17.0694146 |
| C  | 0.0084693  | 0.3247950  | 17.6391372 |
| H  | -0.4910327 | 1.2686405  | 17.8661023 |
| C  | -0.6391362 | -0.8837747 | 17.8794551 |
| H  | -1.6422346 | -0.8850557 | 18.3072495 |
| C  | -0.0130320 | -2.0917846 | 17.5510938 |
| H  | -0.5300897 | -3.0370335 | 17.7208107 |
| C  | 1.2646917  | -2.0862954 | 16.9895000 |
| H  | 1.7560064  | -3.0202032 | 16.7128454 |
| C  | 1.9169070  | -0.8741769 | 16.7484980 |
| H  | 2.8977566  | -0.8921654 | 16.2792149 |
| Pt | 2.6741173  | 2.5530388  | 12.7410573 |
| P  | 4.5726312  | 3.1008912  | 13.8605626 |
| N  | 2.6213977  | 0.5363396  | 12.9869325 |
| N  | 3.2687594  | -0.3923966 | 13.7059736 |
| N  | 1.0396410  | 2.0331361  | 11.6033520 |
| N  | 2.0420310  | 4.3450233  | 12.0583755 |
| N  | 2.3852430  | 5.6171714  | 12.2428543 |
| C  | 2.6404866  | -1.5568922 | 13.4046013 |
| C  | 1.6238376  | -0.1006939 | 12.2857325 |
| C  | 0.7297850  | 0.7216401  | 11.5019266 |
| C  | -0.3676793 | 0.3217280  | 10.7415981 |
| H  | -0.6360824 | -0.7284801 | 10.6681568 |
| C  | -1.1237866 | 1.3258041  | 10.1334524 |
| C  | -0.7768632 | 2.6813928  | 10.2147245 |
| H  | -1.3575949 | 3.4627645  | 9.7326400  |
| C  | 0.3539657  | 3.0113483  | 10.9675421 |
| C  | 0.9333973  | 4.3106318  | 11.2301914 |
| C  | 1.4962807  | 6.3235240  | 11.5014452 |
| C  | 5.9777745  | 2.0438659  | 13.3159432 |
| C  | 6.1588566  | 0.7657912  | 13.8681361 |
| H  | 5.4816378  | 0.3919432  | 14.6304270 |
| C  | 7.1806557  | -0.0668659 | 13.4105505 |
| H  | 7.2965347  | -1.0608955 | 13.8449681 |
| C  | 8.0364696  | 0.3607115  | 12.3936049 |
| H  | 8.8274796  | -0.2958027 | 12.0287249 |
| C  | 7.8685101  | 1.6326819  | 11.8435516 |
| H  | 8.5264675  | 1.9795140  | 11.0466880 |
| C  | 6.8504056  | 2.4699934  | 12.3003742 |
| H  | 6.7524756  | 3.4655428  | 11.8667610 |
| C  | 5.1827074  | 4.7928059  | 13.6117597 |
| C  | 5.1908261  | 5.3097121  | 12.3071684 |
| H  | 4.7617587  | 4.7561174  | 11.4741266 |
| C  | 5.7043328  | 6.5789482  | 12.0568476 |
| H  | 5.6681117  | 6.9675101  | 11.0420869 |
| C  | 6.1912434  | 7.3593321  | 13.1070568 |
| C  | 6.1684563  | 6.8617006  | 14.4108164 |
| H  | 6.5058446  | 7.4790113  | 15.2435153 |
| C  | 5.6716584  | 5.5818130  | 14.6638255 |
| H  | 5.6418050  | 5.2297766  | 15.6934238 |
| H  | 4.0002796  | 3.7996423  | 16.0680763 |
| H  | 5.5142395  | 2.8680362  | 16.0591594 |
| H  | 4.2658596  | 1.1324345  | 16.9769018 |
| H  | 3.6367781  | 0.8633839  | 15.3443400 |
| N  | 0.5749727  | 5.5426580  | 10.8604147 |
| N  | 1.6197835  | -1.4125984 | 12.5166908 |
| N  | 1.4868625  | 7.2280326  | 15.0331279 |
| N  | -2.1706701 | 1.2714836  | 13.1884371 |
| Cl | -3.0877347 | 6.7648517  | 11.4855827 |
| Cl | -2.5522954 | 0.8523884  | 9.2749642  |
| C  | 3.5776937  | 7.8604814  | 16.2346173 |
| C  | 3.7155629  | 9.0920651  | 15.5749404 |

|   |            |            |            |
|---|------------|------------|------------|
| C | 4.4586287  | 7.5530808  | 17.2852627 |
| C | 4.7233880  | 9.9792693  | 15.9452109 |
| H | 3.0357700  | 9.3267827  | 14.7553984 |
| C | 5.4601821  | 8.4503746  | 17.6503929 |
| H | 4.3524900  | 6.5999349  | 17.8046919 |
| C | 5.6163705  | 9.6777388  | 16.9858560 |
| H | 4.8261310  | 10.9265749 | 15.4104525 |
| H | 6.1392052  | 8.1950351  | 18.4673376 |
| C | 1.5310502  | 7.7799627  | 11.4713674 |
| C | 2.6204842  | 8.4776394  | 12.0237735 |
| C | 0.4735909  | 8.5081954  | 10.9133984 |
| C | 2.6489142  | 9.8654849  | 11.9924263 |
| H | 3.4405696  | 7.9155112  | 12.4679946 |
| C | 0.5081912  | 9.9020996  | 10.8968029 |
| H | -0.3657728 | 7.9633838  | 10.4848382 |
| C | 1.5964270  | 10.6061846 | 11.4282772 |
| H | 3.5145636  | 10.3912871 | 12.4019335 |
| H | -0.3200036 | 10.4535984 | 10.4457202 |
| C | -1.9152796 | -1.2091031 | 13.3764250 |
| C | -1.2587279 | -2.2886902 | 13.9927465 |
| C | -2.8724986 | -1.4762962 | 12.3835593 |
| C | -1.5679235 | -3.5959717 | 13.6299013 |
| H | -0.4961016 | -2.0873929 | 14.7443263 |
| C | -3.1623848 | -2.7897697 | 12.0193735 |
| H | -3.3664060 | -0.6399939 | 11.8880720 |
| C | -2.5205318 | -3.8743578 | 12.6366166 |
| H | -1.0480290 | -4.4226299 | 14.1204035 |
| H | -3.8971195 | -2.9787582 | 11.2336077 |
| C | 2.9769273  | -2.8197021 | 14.0546358 |
| C | 2.1258652  | -3.9285726 | 13.9141249 |
| C | 4.0966977  | -2.9345025 | 14.8959241 |
| C | 2.3782171  | -5.1046629 | 14.6159344 |
| H | 1.2534180  | -3.8377021 | 13.2672767 |
| C | 4.3372962  | -4.1140889 | 15.5967538 |
| H | 4.7683147  | -2.0819807 | 15.0055777 |
| C | 3.4813220  | -5.2208326 | 15.4763330 |
| H | 1.6964409  | -5.9513377 | 14.5039206 |
| H | 5.2062000  | -4.1794806 | 16.2559906 |
| C | -2.8582934 | -5.2945844 | 12.2615560 |
| H | -1.9865385 | -5.9558167 | 12.3647021 |
| H | -3.6523189 | -5.6965716 | 12.9119655 |
| H | -3.2189077 | -5.3620274 | 11.2257670 |
| C | 6.6861179  | 10.6555055 | 17.4009915 |
| H | 7.0215837  | 11.2681167 | 16.5527615 |
| H | 6.3103144  | 11.3457114 | 18.1737512 |
| H | 7.5619426  | 10.1418380 | 17.8214602 |
| C | 1.6703623  | 12.1094684 | 11.3706904 |
| H | 1.8101306  | 12.5442869 | 12.3722725 |
| H | 2.5257921  | 12.4320065 | 10.7557830 |
| H | 0.7600850  | 12.5448867 | 10.9369835 |
| C | 3.7578371  | -6.5019203 | 16.2203463 |
| H | 2.8320751  | -7.0586620 | 16.4221485 |
| H | 4.4155552  | -7.1633118 | 15.6333787 |
| H | 4.2590123  | -6.3119339 | 17.1799330 |
| H | 6.5610784  | 8.3672473  | 12.9132298 |

### 17

Energy = -4735.889623077

|    |           |            |           |
|----|-----------|------------|-----------|
| Pt | 2.7977210 | 3.4403354  | 4.4951491 |
| P  | 1.2981352 | 2.9562332  | 2.8679756 |
| N  | 2.9474751 | 5.4566758  | 4.3506901 |
| N  | 2.3178975 | 6.4468288  | 3.6969611 |
| N  | 4.3538072 | 3.8345208  | 5.7791484 |
| N  | 3.2597208 | 1.5825840  | 5.1524216 |
| N  | 2.7772274 | 0.3429242  | 4.9987869 |
| F  | 3.5235604 | 9.2292023  | 2.4876629 |
| F  | 1.4152619 | 8.9533201  | 3.0083439 |
| F  | 2.7934350 | 9.8743940  | 4.4446347 |
| F  | 3.1508481 | -2.2292418 | 7.2516572 |
| F  | 2.3452763 | -2.3336034 | 5.2137223 |
| F  | 4.4966969 | -2.5551686 | 5.5609709 |
| C  | 2.9976454 | 7.5469706  | 4.0713557 |
| C  | 3.9675627 | 6.0125270  | 5.0875852 |
| C  | 4.7702025 | 5.1157620  | 5.9014349 |
| C  | 5.8422588 | 5.4108123  | 6.7451365 |
| H  | 6.1536685 | 6.4446593  | 6.8749363 |
| C  | 6.4555610 | 4.3528693  | 7.4244354 |

|    |            |            |            |
|----|------------|------------|------------|
| H  | 7.2841378  | 4.5639173  | 8.1003008  |
| C  | 6.0247519  | 3.0322628  | 7.2564235  |
| H  | 6.4968262  | 2.1970871  | 7.7698473  |
| C  | 4.9457116  | 2.7913774  | 6.4018381  |
| C  | 4.3033070  | 1.5349151  | 6.0536845  |
| C  | 3.5579874  | -0.3954820 | 5.8071551  |
| C  | 2.6798197  | 8.9033577  | 3.5100920  |
| C  | 3.3771904  | -1.8803491 | 5.9510762  |
| C  | 1.6352914  | 3.8560271  | 1.3113934  |
| C  | 2.8071449  | 4.6037016  | 1.1393473  |
| H  | 3.5256824  | 4.6810220  | 1.9534383  |
| C  | 3.0555875  | 5.2531969  | -0.0717351 |
| H  | 3.9669903  | 5.8400801  | -0.1907570 |
| C  | 2.1382721  | 5.1591091  | -1.1191818 |
| H  | 2.3300484  | 5.6725519  | -2.0621743 |
| C  | 0.9743717  | 4.3996409  | -0.9605376 |
| H  | 0.2605263  | 4.3112989  | -1.7804823 |
| C  | 0.7264363  | 3.7467102  | 0.2456283  |
| H  | -0.1712085 | 3.1337877  | 0.3469343  |
| C  | -0.4421403 | 3.3595157  | 3.2842745  |
| C  | -0.5673861 | 4.8053542  | 3.8067284  |
| C  | 1.3459225  | 1.2107554  | 2.3866878  |
| C  | 2.5401118  | 0.7438895  | 1.8133089  |
| H  | 3.3535470  | 1.4426381  | 1.6077191  |
| C  | 2.6951318  | -0.6103459 | 1.5321872  |
| H  | 3.6286858  | -0.9710774 | 1.0989630  |
| C  | 1.6613255  | -1.5068880 | 1.8228316  |
| H  | 1.7904782  | -2.5710254 | 1.6223174  |
| C  | 0.4689342  | -1.0426466 | 2.3787635  |
| H  | -0.3350177 | -1.7377487 | 2.6179598  |
| C  | 0.3070845  | 0.3147541  | 2.6632491  |
| H  | -0.6165609 | 0.6521073  | 3.1287882  |
| Pt | 0.7054076  | 3.6129351  | 6.7931015  |
| P  | -0.8128408 | 4.8198919  | 5.6236167  |
| N  | 0.0582742  | 1.7192707  | 6.4782916  |
| N  | -0.8502830 | 1.1074689  | 5.7018830  |
| N  | 1.9098082  | 2.5447098  | 8.0705826  |
| N  | 1.8293101  | 5.0856210  | 7.6127975  |
| N  | 1.9714785  | 6.4097761  | 7.4649074  |
| F  | -0.9349018 | -2.3620263 | 5.1481473  |
| F  | -2.5964846 | -1.6303975 | 6.3637285  |
| F  | -2.2674831 | -0.8089840 | 4.3596320  |
| F  | 4.8297766  | 8.1775274  | 8.3471292  |
| F  | 2.9182820  | 8.9704070  | 7.6192577  |
| F  | 3.2022039  | 8.5720562  | 9.7535302  |
| C  | -0.7428887 | -0.1856928 | 6.0600758  |
| C  | 0.6685538  | 0.7639151  | 7.2581937  |
| C  | 1.7171528  | 1.2087523  | 8.1608616  |
| C  | 2.5023177  | 0.4619284  | 9.0408395  |
| H  | 2.3762137  | -0.6170636 | 9.0874874  |
| C  | 3.4572684  | 1.1378638  | 9.8079293  |
| H  | 4.0921428  | 0.5698686  | 10.4878262 |
| C  | 3.6156443  | 2.5248859  | 9.7167898  |
| H  | 4.3472704  | 3.0676174  | 10.3117608 |
| C  | 2.8035841  | 3.2255927  | 8.8212618  |
| C  | 2.7574065  | 4.6494786  | 8.5354841  |
| C  | 2.9737979  | 6.7094308  | 8.3102157  |
| C  | -1.6310479 | -1.2483238 | 5.4795158  |
| C  | 3.4745464  | 8.1137996  | 8.4964811  |
| C  | -2.5180141 | 4.2081437  | 5.8793884  |
| C  | -2.8097196 | 3.3067874  | 6.9125691  |
| H  | -2.0081833 | 2.9400763  | 7.5524541  |
| C  | -4.1198031 | 2.8705663  | 7.1181351  |
| H  | -4.3322443 | 2.1616575  | 7.9189537  |
| C  | -5.1488385 | 3.3288525  | 6.2937645  |
| H  | -6.1704998 | 2.9795752  | 6.4485223  |
| C  | -4.8682840 | 4.2391808  | 5.2697596  |
| H  | -5.6702171 | 4.6080755  | 4.6290964  |
| C  | -3.5615504 | 4.6818709  | 5.0670044  |
| H  | -3.3617774 | 5.4091624  | 4.2789184  |
| C  | -0.8572480 | 6.5500239  | 6.1552338  |
| C  | -1.2819616 | 6.8028747  | 7.4697048  |
| H  | -1.6518735 | 5.9836980  | 8.0894074  |
| C  | -1.2081566 | 8.0922608  | 7.9888279  |
| H  | -1.5294085 | 8.2834531  | 9.0134800  |
| C  | -0.7065030 | 9.1349406  | 7.2025259  |
| H  | -0.6294467 | 10.1407854 | 7.6169288  |

|   |            |            |           |
|---|------------|------------|-----------|
| C | -0.2954869 | 8.8873740  | 5.8925136 |
| H | 0.1077147  | 9.6923739  | 5.2788934 |
| C | -0.3694201 | 7.5969938  | 5.3651070 |
| H | -0.0130300 | 7.4167515  | 4.3530860 |
| H | 0.3282806  | 5.4099555  | 3.5915879 |
| H | -1.4141799 | 5.3232852  | 3.3372679 |
| H | -1.0535349 | 3.2117166  | 2.3844670 |
| H | -0.7816531 | 2.6163473  | 4.0235770 |
| N | 3.4943670  | 5.6622130  | 8.9974824 |
| N | 0.1714981  | -0.4512427 | 7.0195084 |
| N | 4.0275338  | 7.3350902  | 4.9204178 |
| N | 4.5162225  | 0.2880914  | 6.4816575 |

(17)<sub>2</sub>

Energy = -9471.826583010

|    |            |            |            |
|----|------------|------------|------------|
| Pt | 2.9479066  | 3.1002057  | 5.1497750  |
| P  | 1.3672791  | 2.6831443  | 3.5776600  |
| N  | 3.0983619  | 5.1211325  | 5.0769280  |
| N  | 2.4844957  | 6.1293745  | 4.4378142  |
| N  | 4.6140440  | 3.4356722  | 6.3079096  |
| N  | 3.4844744  | 1.2121557  | 5.6495715  |
| N  | 2.9970719  | -0.0228397 | 5.4753165  |
| F  | 3.8303762  | 8.8499311  | 3.1914529  |
| F  | 1.7021541  | 8.6471877  | 3.6655353  |
| F  | 3.0752569  | 9.5461275  | 5.1206474  |
| F  | 3.7319940  | -2.7132641 | 7.5046743  |
| F  | 2.5898912  | -2.7170019 | 5.6313465  |
| F  | 4.7679479  | -2.9337548 | 5.5908372  |
| C  | 3.2174125  | 7.2065652  | 4.7787117  |
| C  | 4.1674253  | 5.6434399  | 5.7698573  |
| C  | 5.0285559  | 4.7119922  | 6.4763029  |
| C  | 6.1789536  | 4.9700015  | 7.2234708  |
| H  | 6.4856020  | 5.9991935  | 7.3969162  |
| C  | 6.8882128  | 3.8785111  | 7.7356665  |
| H  | 7.7876418  | 4.0569105  | 8.3251154  |
| C  | 6.4699631  | 2.5639679  | 7.4997950  |
| H  | 7.0186770  | 1.7030904  | 7.8765053  |
| C  | 5.2975179  | 2.3630305  | 6.7667071  |
| C  | 4.6398883  | 1.1215803  | 6.3983200  |
| C  | 3.8857263  | -0.8002638 | 6.1187670  |
| C  | 2.9524218  | 8.5652347  | 4.1966572  |
| C  | 3.7311079  | -2.2919597 | 6.2017447  |
| C  | 1.6626730  | 3.6488941  | 2.0514691  |
| C  | 2.8681178  | 4.3353348  | 1.8541457  |
| H  | 3.6307268  | 4.3231672  | 2.6316711  |
| C  | 3.0931901  | 5.0386796  | 0.6695143  |
| H  | 4.0314705  | 5.5771664  | 0.5329694  |
| C  | 2.1171549  | 5.0619888  | -0.3277576 |
| H  | 2.2897019  | 5.6188864  | -1.2495853 |
| C  | 0.9178818  | 4.3660936  | -0.1451731 |
| H  | 0.1564883  | 4.3710696  | -0.9261607 |
| C  | 0.6935656  | 3.6582890  | 1.0346779  |
| H  | -0.2366006 | 3.0995936  | 1.1511833  |
| C  | -0.3636522 | 3.0707329  | 4.0467573  |
| C  | -0.4814726 | 4.5243919  | 4.5485582  |
| C  | 1.4034547  | 0.9572724  | 3.0291966  |
| C  | 2.5613704  | 0.5278045  | 2.3601145  |
| H  | 3.3447908  | 1.2470242  | 2.1130813  |
| C  | 2.7211093  | -0.8165424 | 2.0370458  |
| H  | 3.6274896  | -1.1482329 | 1.5292338  |
| C  | 1.7287451  | -1.7403839 | 2.3815782  |
| H  | 1.8637330  | -2.7972213 | 2.1488414  |
| C  | 0.5708064  | -1.3130331 | 3.0321465  |
| H  | -0.2001193 | -2.0298150 | 3.3124546  |
| C  | 0.4042048  | 0.0342250  | 3.3587091  |
| H  | -0.4901869 | 0.3418226  | 3.8969353  |
| Pt | 0.7593798  | 3.3050794  | 7.5002109  |
| P  | -0.7488979 | 4.5873791  | 6.3666488  |
| N  | 0.1949544  | 1.3697260  | 7.1379274  |
| N  | -0.7592786 | 0.7174034  | 6.4444703  |
| N  | 2.1571331  | 2.2344228  | 8.5680244  |
| N  | 1.9174241  | 4.7853291  | 8.2769849  |
| N  | 1.9921129  | 6.1208745  | 8.1929010  |
| F  | -0.6832966 | -2.7688726 | 5.8376832  |
| F  | -2.3105137 | -2.0745751 | 7.1194591  |
| F  | -2.1015170 | -1.2675463 | 5.0954770  |
| F  | 4.9047630  | 7.9282101  | 9.0201025  |

|    |            |            |            |
|----|------------|------------|------------|
| F  | 3.0136392  | 8.6712958  | 8.1904698  |
| F  | 3.1968177  | 8.3019971  | 10.3370690 |
| C  | -0.5165895 | -0.5797649 | 6.7130292  |
| C  | 0.9628951  | 0.4226131  | 7.7706115  |
| C  | 2.0901718  | 0.8849165  | 8.5476852  |
| C  | 3.0677893  | 0.1322672  | 9.1900933  |
| H  | 3.0300247  | -0.9520361 | 9.1435633  |
| C  | 4.0963359  | 0.8138984  | 9.8447182  |
| H  | 4.8750936  | 0.2283417  | 10.3315719 |
| C  | 4.1363062  | 2.2096982  | 9.8748918  |
| H  | 4.9131193  | 2.7649308  | 10.3956828 |
| C  | 3.1334397  | 2.9141604  | 9.2057443  |
| C  | 2.9821188  | 4.3435441  | 9.0334258  |
| C  | 3.0946515  | 6.4174807  | 8.9038112  |
| C  | -1.4012895 | -1.6779315 | 6.1924379  |
| C  | 3.5510075  | 7.8357796  | 9.1072871  |
| C  | -2.5249194 | 4.1777523  | 6.5705721  |
| C  | -2.9502425 | 2.8993399  | 6.9519835  |
| H  | -2.2242068 | 2.1057176  | 7.1071156  |
| C  | -4.3108136 | 2.6241996  | 7.1082402  |
| H  | -4.6235163 | 1.6268509  | 7.4191865  |
| C  | -5.2590798 | 3.6218740  | 6.8762463  |
| H  | -6.3208257 | 3.4098622  | 7.0089973  |
| C  | -4.8436223 | 4.8953902  | 6.4730346  |
| H  | -5.5790604 | 5.6787575  | 6.2846778  |
| C  | -3.4857665 | 5.1755920  | 6.3219646  |
| H  | -3.1709633 | 6.1788674  | 6.0321672  |
| C  | -0.6849569 | 6.3408325  | 6.8373323  |
| C  | -1.1762675 | 6.6955381  | 8.1042389  |
| H  | -1.6749521 | 5.9484080  | 8.7185558  |
| C  | -1.0401151 | 7.9969103  | 8.5758437  |
| H  | -1.4122695 | 8.2572426  | 9.5675154  |
| C  | -0.4181287 | 8.9645124  | 7.7806760  |
| H  | -0.2906623 | 9.9805401  | 8.1552724  |
| C  | 0.0390371  | 8.6270498  | 6.5074308  |
| H  | 0.5215841  | 9.3757156  | 5.8809471  |
| C  | -0.0907223 | 7.3197265  | 6.0338284  |
| H  | 0.3044323  | 7.0731791  | 5.0516417  |
| H  | 0.4241828  | 5.1113506  | 4.3268290  |
| H  | -1.3281807 | 5.0418099  | 4.0768831  |
| H  | -1.0021456 | 2.9018497  | 3.1698142  |
| H  | -0.6725250 | 2.3318179  | 4.8017033  |
| N  | 3.7442088  | 5.3584261  | 9.4439283  |
| N  | 0.5343220  | -0.8151015 | 7.5248976  |
| N  | 4.2675574  | 6.9624311  | 5.5929213  |
| N  | 4.9215523  | -0.1478047 | 6.7020890  |
| Pt | -0.2791531 | 1.4876547  | 14.7232924 |
| P  | 0.0355006  | -0.6252765 | 15.4845697 |
| N  | 1.1337389  | 2.5260436  | 15.7478294 |
| N  | 2.1278544  | 2.2519485  | 16.6087284 |
| N  | -0.7873800 | 3.4315641  | 14.2820540 |
| N  | -1.9177679 | 1.2288623  | 13.5565093 |
| N  | -2.5880115 | 0.2001455  | 13.0201515 |
| F  | 3.0977143  | 4.1255823  | 19.1858386 |
| F  | 4.2636343  | 2.4928454  | 18.3085702 |
| F  | 4.5695240  | 4.5576816  | 17.6318986 |
| F  | -4.5233634 | 0.3755692  | 10.1965763 |
| F  | -4.3795820 | -1.3023313 | 11.6031382 |
| F  | -5.8479430 | 0.2892578  | 11.9338687 |
| C  | 2.5672190  | 3.4709742  | 16.9757403 |
| C  | 1.0283761  | 3.8948348  | 15.6417894 |
| C  | -0.0410509 | 4.4247474  | 14.8157166 |
| C  | -0.3795336 | 5.7548916  | 14.5619498 |
| H  | 0.2504142  | 6.5509493  | 14.9525699 |
| C  | -1.5194264 | 6.0070900  | 13.7914140 |
| H  | -1.8005610 | 7.0383451  | 13.5775815 |
| C  | -2.3070969 | 4.9622494  | 13.2950914 |
| H  | -3.2042245 | 5.1391436  | 12.7053226 |
| C  | -1.9076235 | 3.6493880  | 13.5575268 |
| C  | -2.5217116 | 2.3998412  | 13.1475713 |
| C  | -3.5689063 | 0.7997180  | 12.3219127 |
| C  | 3.6300911  | 3.6623845  | 18.0197775 |
| C  | -4.5758715 | 0.0259533  | 11.5193423 |
| C  | 0.2021876  | -0.6742886 | 17.3069436 |
| C  | -0.0467121 | 0.4596344  | 18.0914425 |
| H  | -0.3103552 | 1.4015645  | 17.6134418 |
| C  | 0.0447433  | 0.3863861  | 19.4830880 |

|    |            |            |            |
|----|------------|------------|------------|
| H  | -0.1427566 | 1.2777330  | 20.0825972 |
| C  | 0.3832411  | -0.8181063 | 20.1016166 |
| H  | 0.4603451  | -0.8725270 | 21.1882258 |
| C  | 0.6180534  | -1.9581543 | 19.3257907 |
| H  | 0.8701846  | -2.9053509 | 19.8041513 |
| C  | 0.5223638  | -1.8887441 | 17.9368403 |
| H  | 0.6797046  | -2.7924840 | 17.3455981 |
| C  | 1.5251849  | -1.4974295 | 14.8599470 |
| C  | 2.7975901  | -0.6596687 | 15.0973754 |
| C  | -1.3865399 | -1.6965949 | 15.1511112 |
| C  | -2.5936997 | -1.3725292 | 15.7914350 |
| H  | -2.6246328 | -0.5508202 | 16.5098573 |
| C  | -3.7531466 | -2.0821552 | 15.4933963 |
| H  | -4.6907020 | -1.8196514 | 15.9846951 |
| C  | -3.7166962 | -3.1168093 | 14.5528448 |
| H  | -4.6289114 | -3.6599940 | 14.3040048 |
| C  | -2.5159524 | -3.4482667 | 13.9248570 |
| H  | -2.4834262 | -4.2455225 | 13.1830542 |
| C  | -1.3490668 | -2.7404941 | 14.2201268 |
| H  | -0.4295092 | -2.9939324 | 13.6963236 |
| Pt | 1.8221778  | 1.1117230  | 12.3262095 |
| P  | 3.4466971  | 0.0628025  | 13.5353462 |
| N  | 0.6436909  | -0.3989607 | 11.5984263 |
| N  | 0.5942908  | -1.7445393 | 11.6571899 |
| N  | 0.4032417  | 2.1403055  | 11.2446731 |
| N  | 2.3925508  | 3.0390600  | 12.6229271 |
| N  | 3.3247803  | 3.6919584  | 13.3318236 |
| F  | -2.1908836 | -3.6490966 | 10.5895349 |
| F  | -0.3741206 | -3.8999045 | 9.4022741  |
| F  | -0.3362485 | -4.3271113 | 11.5474923 |
| F  | 3.0279287  | 7.0374939  | 14.2807424 |
| F  | 4.6885413  | 5.6510085  | 14.6602954 |
| F  | 4.5812974  | 6.7460984  | 12.7692459 |
| C  | -0.4663557 | -2.0571809 | 10.8884284 |
| C  | -0.3994109 | 0.0172888  | 10.8065719 |
| C  | -0.5714960 | 1.4412323  | 10.6214824 |
| C  | -1.5880004 | 2.1165577  | 9.9517627  |
| H  | -2.3870449 | 1.5531763  | 9.4779155  |
| C  | -1.5563795 | 3.5130998  | 9.9462260  |
| H  | -2.3564701 | 4.0481888  | 9.4368934  |
| C  | -0.5275398 | 4.2171079  | 10.5766664 |
| H  | -0.4669935 | 5.3028361  | 10.5690025 |
| C  | 0.4597864  | 3.4888361  | 11.2419070 |
| C  | 1.5830472  | 3.9745361  | 12.0142838 |
| C  | 3.0327084  | 4.9866424  | 13.1111852 |
| C  | -0.8477899 | -3.4835656 | 10.6048499 |
| C  | 3.8394206  | 6.1036854  | 13.7118569 |
| C  | 4.3105566  | -1.3329175 | 12.7167654 |
| C  | 3.7215863  | -2.0533486 | 11.6703262 |
| H  | 2.7128483  | -1.8157166 | 11.3444172 |
| C  | 4.4120248  | -3.1014360 | 11.0570215 |
| H  | 3.9434692  | -3.6419563 | 10.2340929 |
| C  | 5.6946810  | -3.4437887 | 11.4886971 |
| H  | 6.2384775  | -4.2534415 | 11.0006098 |
| C  | 6.2811748  | -2.7438858 | 12.5484905 |
| H  | 7.2812392  | -3.0084948 | 12.8945601 |
| C  | 5.5968513  | -1.6937462 | 13.1605377 |
| H  | 6.0734501  | -1.1379929 | 13.9687459 |
| C  | 4.8256606  | 1.1478646  | 14.0159664 |
| C  | 5.6909333  | 1.5924231  | 13.0035752 |
| H  | 5.5635385  | 1.2261132  | 11.9881067 |
| C  | 6.7165036  | 2.4872993  | 13.2877082 |
| H  | 7.3706236  | 2.8356618  | 12.4874717 |
| C  | 6.9001137  | 2.9421370  | 14.5968703 |
| H  | 7.6919318  | 3.6568558  | 14.8226868 |
| C  | 6.0679372  | 2.4771698  | 15.6139488 |
| H  | 6.2087598  | 2.8210610  | 16.6371855 |
| C  | 5.0302128  | 1.5857505  | 15.3288325 |
| H  | 4.3775308  | 1.2626346  | 16.1355114 |
| H  | 2.6166153  | 0.1748347  | 15.7934895 |
| H  | 3.6025150  | -1.2735457 | 15.5250639 |
| H  | 1.5903205  | -2.4639385 | 15.3772039 |
| H  | 1.3540269  | -1.7249615 | 13.7964241 |
| N  | 1.9672016  | 5.2175208  | 12.3076652 |
| N  | -1.1132937 | -1.0075451 | 10.3416556 |
| N  | 1.9221101  | 4.5159385  | 16.4132393 |
| N  | -3.5779368 | 2.1548109  | 12.3689957 |



20

Energy = -5655.226707802

|    |            |            |            |
|----|------------|------------|------------|
| Pt | 2.7964994  | 3.4229202  | 4.4853307  |
| P  | 1.2918661  | 2.9481713  | 2.8600259  |
| N  | 2.9535928  | 5.4394043  | 4.3520552  |
| N  | 2.3334622  | 6.4332980  | 3.6963440  |
| N  | 4.3432698  | 3.8080167  | 5.7806152  |
| N  | 3.2516326  | 1.5610892  | 5.1391805  |
| N  | 2.7704033  | 0.3223451  | 4.9780229  |
| F  | 3.5533342  | 9.2088891  | 2.5014384  |
| F  | 1.4412154  | 8.9464230  | 3.0128088  |
| F  | 2.8184581  | 9.8596744  | 4.4549500  |
| F  | 3.1221596  | -2.2524025 | 7.2303497  |
| F  | 2.3313004  | -2.3546326 | 5.1864242  |
| F  | 4.4795046  | -2.5806411 | 5.5489804  |
| C  | 3.0107604  | 7.5312400  | 4.0830317  |
| C  | 3.9663724  | 5.9912382  | 5.1033525  |
| C  | 4.7547081  | 5.0887126  | 5.9245749  |
| C  | 5.7968116  | 5.3877602  | 6.8003503  |
| H  | 6.1044514  | 6.4178200  | 6.9599716  |
| C  | 6.3810389  | 4.3198496  | 7.4940573  |
| C  | 5.9707693  | 2.9934178  | 7.3038804  |
| H  | 6.4316589  | 2.1655280  | 7.8374089  |
| C  | 4.9222651  | 2.7638753  | 6.4128147  |
| C  | 4.2877985  | 1.5086409  | 6.0493827  |
| C  | 3.5437819  | -0.4198012 | 5.7909619  |
| C  | 2.7031497  | 8.8898632  | 3.5201312  |
| C  | 3.3591518  | -1.9050865 | 5.9321502  |
| C  | 1.6203407  | 3.8576483  | 1.3080193  |
| C  | 2.7964612  | 4.5975324  | 1.1313591  |
| H  | 3.5232511  | 4.6623588  | 1.9392858  |
| C  | 3.0385605  | 5.2555921  | -0.0762725 |
| H  | 3.9533663  | 5.8362343  | -0.1990329 |
| C  | 2.1105427  | 5.1778912  | -1.1156365 |
| H  | 2.2972896  | 5.6982125  | -2.0558491 |
| C  | 0.9422059  | 4.4262481  | -0.9526136 |
| H  | 0.2201650  | 4.3507175  | -1.7666464 |
| C  | 0.7003949  | 3.7648152  | 0.2501433  |
| H  | -0.2015568 | 3.1588854  | 0.3545453  |
| C  | -0.4455149 | 3.3497353  | 3.2882045  |
| C  | -0.5656049 | 4.7985628  | 3.8045777  |
| C  | 1.3447147  | 1.2045682  | 2.3744907  |
| C  | 2.5402269  | 0.7456332  | 1.7973102  |
| H  | 3.3481635  | 1.4497928  | 1.5884657  |
| C  | 2.7040969  | -0.6077695 | 1.5176538  |
| H  | 3.6388034  | -0.9624099 | 1.0818806  |
| C  | 1.6776805  | -1.5110677 | 1.8134527  |
| H  | 1.8138614  | -2.5745271 | 1.6140893  |
| C  | 0.4838751  | -1.0547035 | 2.3730893  |
| H  | -0.3137142 | -1.7557124 | 2.6162402  |
| C  | 0.3132077  | 0.3018325  | 2.6566119  |
| H  | -0.6109639 | 0.6335193  | 3.1255056  |
| Pt | 0.7034708  | 3.6255161  | 6.8007111  |
| P  | -0.8140167 | 4.8233846  | 5.6208310  |
| N  | 0.0698493  | 1.7260578  | 6.4900311  |
| N  | -0.8345513 | 1.1058738  | 5.7160887  |
| N  | 1.9131102  | 2.5679155  | 8.0793563  |
| N  | 1.8209214  | 5.1054601  | 7.6189893  |
| N  | 1.9592640  | 6.4291567  | 7.4680967  |
| F  | -0.8883200 | -2.3630539 | 5.1580945  |
| F  | -2.5485961 | -1.6521394 | 6.3872952  |
| F  | -2.2439295 | -0.8238067 | 4.3820861  |
| F  | 4.8134661  | 8.2075292  | 8.3095585  |
| F  | 2.8849548  | 8.9952600  | 7.6218116  |
| F  | 3.2152411  | 8.5987030  | 9.7498692  |
| C  | -0.7142377 | -0.1869324 | 6.0730862  |
| C  | 0.6913371  | 0.7747570  | 7.2672814  |
| C  | 1.7411325  | 1.2287586  | 8.1634462  |
| C  | 2.5487897  | 0.4790401  | 9.0167356  |
| H  | 2.4527197  | -0.6026861 | 9.0569412  |
| C  | 3.5117764  | 1.1696204  | 9.7644569  |
| C  | 3.6501942  | 2.5624164  | 9.6973599  |
| H  | 4.3925083  | 3.0974395  | 10.2845841 |
| C  | 2.8092836  | 3.2519749  | 8.8236750  |
| C  | 2.7515641  | 4.6757519  | 8.5429937  |
| C  | 2.9611812  | 6.7351881  | 8.3124976  |

|    |            |            |            |
|----|------------|------------|------------|
| C  | -1.5948934 | -1.2586021 | 5.4962503  |
| C  | 3.4625401  | 8.1414986  | 8.4885479  |
| C  | -2.5186812 | 4.2128376  | 5.8775583  |
| C  | -2.8116644 | 3.3115962  | 6.9103718  |
| H  | -2.0110512 | 2.9432602  | 7.5503588  |
| C  | -4.1227526 | 2.8785401  | 7.1164929  |
| H  | -4.3366827 | 2.1704845  | 7.9176629  |
| C  | -5.1510842 | 3.3400540  | 6.2930868  |
| H  | -6.1736671 | 2.9940859  | 6.4488897  |
| C  | -4.8689904 | 4.2500816  | 5.2691824  |
| H  | -5.6705434 | 4.6217122  | 4.6297234  |
| C  | -3.5613701 | 4.6895447  | 5.0657339  |
| H  | -3.3601158 | 5.4170578  | 4.2781475  |
| C  | -0.8559211 | 6.5557943  | 6.1439018  |
| C  | -1.2798503 | 6.8149798  | 7.4574820  |
| H  | -1.6549510 | 5.9998891  | 8.0794854  |
| C  | -1.1974821 | 8.1051921  | 7.9731820  |
| H  | -1.5169141 | 8.3012635  | 8.9974544  |
| C  | -0.6888642 | 9.1423184  | 7.1840654  |
| H  | -0.6046972 | 10.1486114 | 7.5958803  |
| C  | -0.2801611 | 8.8888798  | 5.8744576  |
| H  | 0.1276447  | 9.6899568  | 5.2588502  |
| C  | -0.3619010 | 7.5975463  | 5.3505797  |
| H  | -0.0066897 | 7.4123427  | 4.3389697  |
| H  | 0.3329540  | 5.3983225  | 3.5881832  |
| H  | -1.4090573 | 5.3185421  | 3.3313822  |
| H  | -1.0645554 | 3.1977399  | 2.3943527  |
| H  | -0.7787276 | 2.6096182  | 4.0332900  |
| N  | 3.4856363  | 5.6918299  | 9.0016497  |
| N  | 0.2055096  | -0.4446261 | 7.0289152  |
| N  | 4.0298785  | 7.3142570  | 4.9432154  |
| N  | 4.4959888  | 0.2608492  | 6.4758181  |
| Cl | 7.6380388  | 4.6491794  | 8.6369634  |
| Cl | 4.5784869  | 0.2728829  | 10.7907507 |

**(20)<sub>2</sub>**

Energy = -11310.51449009

|    |           |            |            |
|----|-----------|------------|------------|
| Pt | 3.7430384 | 1.5802823  | 5.5862540  |
| P  | 2.3484685 | 0.4667207  | 4.1882580  |
| N  | 3.2478477 | 3.5083837  | 5.2205199  |
| N  | 2.3318650 | 4.1619906  | 4.4901674  |
| N  | 5.1922974 | 2.5914022  | 6.6342299  |
| N  | 4.8306127 | 0.0517318  | 6.3589264  |
| N  | 4.7664917 | -1.2861590 | 6.3857695  |
| F  | 2.7399039 | 7.0396088  | 2.9085961  |
| F  | 0.8048357 | 6.1121400  | 3.3492266  |
| F  | 1.6502296 | 7.6037341  | 4.7156852  |
| F  | 6.2212185 | -3.2782155 | 8.7872886  |
| F  | 5.2610603 | -3.9190872 | 6.9226409  |
| F  | 7.3899782 | -3.4049544 | 6.9428781  |
| C  | 2.6622604 | 5.4560187  | 4.6602051  |
| C  | 4.0797139 | 4.4420680  | 5.7983820  |
| C  | 5.1600377 | 3.9440465  | 6.6336385  |
| C  | 6.0676209 | 4.6581274  | 7.4156598  |
| H  | 6.0013821 | 5.7405913  | 7.4841459  |
| C  | 6.9905742 | 3.9190990  | 8.1680833  |
| C  | 7.0760736 | 2.5235873  | 8.0783312  |
| H  | 7.8008228 | 1.9517549  | 8.6532468  |
| C  | 6.1311059 | 1.8710437  | 7.2857049  |
| C  | 5.9250484 | 0.4460855  | 7.1015987  |
| C  | 5.8313454 | -1.6339123 | 7.1315597  |
| C  | 1.9576874 | 6.5562011  | 3.9171095  |
| C  | 6.1667204 | -3.0668144 | 7.4406241  |
| C  | 2.3234094 | 1.2038761  | 2.5139228  |
| C  | 3.2309943 | 2.2056340  | 2.1454576  |
| H  | 3.9506584 | 2.5788948  | 2.8724456  |
| C  | 3.2131733 | 2.7304350  | 0.8514552  |
| H  | 3.9175827 | 3.5172677  | 0.5799230  |
| C  | 2.2923821 | 2.2572059  | -0.0845086 |
| H  | 2.2744524 | 2.6728514  | -1.0928356 |
| C  | 1.3949973 | 1.2448166  | 0.2708040  |
| H  | 0.6823665 | 0.8619986  | -0.4607252 |
| C  | 1.4127336 | 0.7173395  | 1.5611110  |
| H  | 0.7239955 | -0.0896529 | 1.8165858  |
| C  | 0.5882113 | 0.4047209  | 4.7005817  |
| C  | 0.0326107 | 1.8137312  | 4.9881889  |
| C  | 2.8827692 | -1.2428871 | 3.9158660  |

|    |            |            |            |
|----|------------|------------|------------|
| C  | 4.1133208  | -1.4270552 | 3.2647103  |
| H  | 4.6571830  | -0.5634090 | 2.8767216  |
| C  | 4.6501458  | -2.7047287 | 3.1377627  |
| H  | 5.6119452  | -2.8416435 | 2.6425545  |
| C  | 3.9655217  | -3.8060031 | 3.6623422  |
| H  | 4.3967740  | -4.8043506 | 3.5823954  |
| C  | 2.7354316  | -3.6270638 | 4.2957813  |
| H  | 2.2010048  | -4.4803485 | 4.7125003  |
| C  | 2.1907085  | -2.3478286 | 4.4248836  |
| H  | 1.2443878  | -2.2258709 | 4.9481003  |
| Pt | 1.5965155  | 1.5430116  | 8.0265470  |
| P  | -0.2303015 | 2.1193825  | 6.7846240  |
| N  | 1.6381470  | -0.4981784 | 7.9842893  |
| N  | 0.9322365  | -1.5008680 | 7.4333566  |
| N  | 3.2415414  | 1.1217926  | 9.1945485  |
| N  | 2.2674348  | 3.3996402  | 8.5082686  |
| N  | 1.9716624  | 4.6577911  | 8.1653669  |
| F  | 1.9576711  | -4.8896682 | 7.4222883  |
| F  | 0.1984457  | -4.4256084 | 8.6340706  |
| F  | 0.1982159  | -3.9661751 | 6.4930862  |
| F  | 4.2271832  | 7.3020589  | 8.3767363  |
| F  | 2.1386845  | 7.3272229  | 7.6937483  |
| F  | 2.5999045  | 7.5045171  | 9.8197360  |
| C  | 1.5279071  | -2.6109875 | 7.9023864  |
| C  | 2.6379661  | -1.0662960 | 8.7374612  |
| C  | 3.5755241  | -0.1752191 | 9.3863340  |
| C  | 4.7311745  | -0.5049368 | 10.0842165 |
| H  | 5.0258761  | -1.5430804 | 10.2113627 |
| C  | 5.5188538  | 0.5527232  | 10.5541877 |
| C  | 5.1302378  | 1.8917860  | 10.4152934 |
| H  | 5.7368511  | 2.7093426  | 10.7981027 |
| C  | 3.9562994  | 2.1484468  | 9.7028451  |
| C  | 3.3832204  | 3.4246905  | 9.3217222  |
| C  | 2.9060450  | 5.3868272  | 8.7967818  |
| C  | 0.9791751  | -3.9783170 | 7.6101618  |
| C  | 2.9547133  | 6.8828833  | 8.6632434  |
| C  | -1.8148463 | 1.2610472  | 7.1476613  |
| C  | -1.8571366 | -0.1367305 | 7.2591732  |
| H  | -0.9409924 | -0.7255418 | 7.2191066  |
| C  | -3.0758185 | -0.7918598 | 7.4457701  |
| H  | -3.0877950 | -1.8792798 | 7.5327362  |
| C  | -4.2642114 | -0.0642865 | 7.5341525  |
| H  | -5.2138635 | -0.5783960 | 7.6893736  |
| C  | -4.2292050 | 1.3279384  | 7.4233673  |
| H  | -5.1505465 | 1.9081412  | 7.4903039  |
| C  | -3.0161495 | 1.9897368  | 7.2245688  |
| H  | -3.0091238 | 3.0747433  | 7.1334848  |
| C  | -0.6527582 | 3.8691878  | 6.9610363  |
| C  | -0.9963536 | 4.3163886  | 8.2467330  |
| H  | -0.9686275 | 3.6340411  | 9.0955341  |
| C  | -1.3442153 | 5.6438950  | 8.4618972  |
| H  | -1.5925814 | 5.9732722  | 9.4681919  |
| C  | -1.3252638 | 6.5479133  | 7.3958749  |
| H  | -1.5704253 | 7.5964748  | 7.5683843  |
| C  | -0.9721130 | 6.1130471  | 6.1177667  |
| H  | -0.9344823 | 6.8166971  | 5.2870995  |
| C  | -0.6434274 | 4.7738915  | 5.8934610  |
| H  | -0.3562566 | 4.4610513  | 4.8919375  |
| H  | 0.7095303  | 2.6048259  | 4.6264358  |
| H  | -0.9368688 | 1.9615368  | 4.4930154  |
| H  | 0.0188793  | -0.0875721 | 3.9012429  |
| H  | 0.5396169  | -0.2631843 | 5.5721104  |
| N  | 3.8014487  | 4.6769711  | 9.5282215  |
| N  | 2.5845688  | -2.3990437 | 8.7142420  |
| N  | 3.7334017  | 5.6836658  | 5.4528476  |
| N  | 6.5809903  | -0.6052053 | 7.5972164  |
| Cl | 8.0049917  | 4.7409792  | 9.3070919  |
| Cl | 7.0420957  | 0.1716918  | 11.2656997 |
| Pt | 1.8144329  | 2.9709559  | 15.8255985 |
| P  | 3.6153333  | 2.7759968  | 17.1843405 |
| N  | 1.5284441  | 4.9730885  | 15.8237055 |
| N  | 2.1495092  | 6.0493727  | 16.3275328 |
| N  | 0.0446325  | 3.1368426  | 14.7995647 |
| N  | 1.3778681  | 1.0286419  | 15.4585161 |
| N  | 1.9457686  | -0.1639122 | 15.6788914 |
| F  | 0.7587363  | 8.8208413  | 17.4867768 |
| F  | 2.8630206  | 8.6127625  | 16.9188740 |

|    |            |            |            |
|----|------------|------------|------------|
| F  | 1.4010762  | 9.3732103  | 15.4723462 |
| F  | 1.3597965  | -3.0008060 | 13.8350061 |
| F  | 2.4771667  | -2.8374825 | 15.7164917 |
| F  | 0.3125969  | -3.1690816 | 15.7473728 |
| C  | 1.3239912  | 7.0636942  | 16.0073436 |
| C  | 0.3624754  | 5.3928633  | 15.2229911 |
| C  | -0.4781980 | 4.3718358  | 14.6192243 |
| C  | -1.6711284 | 4.5195697  | 13.9134266 |
| H  | -2.0780631 | 5.5079286  | 13.7218999 |
| C  | -2.2754001 | 3.3566617  | 13.4182729 |
| C  | -1.7509897 | 2.0806481  | 13.6613319 |
| H  | -2.2309930 | 1.1781043  | 13.2900340 |
| C  | -0.5590323 | 2.0026235  | 14.3822086 |
| C  | 0.2038306  | 0.8273028  | 14.7622705 |
| C  | 1.0848337  | -1.0275091 | 15.1102229 |
| C  | 1.5894681  | 8.4708310  | 16.4628489 |
| C  | 1.3206486  | -2.5116702 | 15.1071640 |
| C  | 3.4718805  | 3.8652370  | 18.6457196 |
| C  | 2.2269858  | 4.3907590  | 19.0191178 |
| H  | 1.3484161  | 4.1854038  | 18.4077020 |
| C  | 2.1111837  | 5.1850427  | 20.1603243 |
| H  | 1.1395779  | 5.5973235  | 20.4342598 |
| C  | 3.2372270  | 5.4631528  | 20.9372448 |
| H  | 3.1480720  | 6.0914749  | 21.8242096 |
| C  | 4.4803387  | 4.9346914  | 20.5767376 |
| H  | 5.3622458  | 5.1441795  | 21.1832685 |
| C  | 4.5969707  | 4.1350959  | 19.4402728 |
| H  | 5.5701000  | 3.7148329  | 19.1838316 |
| C  | 5.2123001  | 3.2237025  | 16.4033923 |
| C  | 5.1346586  | 4.6372929  | 15.7940778 |
| C  | 3.7802043  | 1.1096473  | 17.8726515 |
| C  | 2.7272141  | 0.6487284  | 18.6796858 |
| H  | 1.8913270  | 1.3109828  | 18.9136552 |
| C  | 2.7363322  | -0.6580391 | 19.1579824 |
| H  | 1.9102893  | -1.0161991 | 19.7733272 |
| C  | 3.7951259  | -1.5127518 | 18.8335855 |
| H  | 3.7931782  | -2.5425667 | 19.1919467 |
| C  | 4.8480606  | -1.0526531 | 18.0423336 |
| H  | 5.6680368  | -1.7183855 | 17.7769909 |
| C  | 4.8437197  | 0.2568973  | 17.5570640 |
| H  | 5.6560595  | 0.5881403  | 16.9131151 |
| Pt | 3.4897094  | 3.1525708  | 13.1343539 |
| P  | 5.0205895  | 4.6269336  | 13.9564980 |
| N  | 4.2481790  | 1.2998016  | 13.5721954 |
| N  | 5.2903466  | 0.7773913  | 14.2481185 |
| N  | 2.1202789  | 1.8978278  | 12.2391499 |
| N  | 2.1325837  | 4.4688132  | 12.4009278 |
| N  | 1.9031351  | 5.7827603  | 12.4989711 |
| F  | 5.5164228  | -2.5505715 | 15.2918685 |
| F  | 6.8470336  | -2.1302517 | 13.6170492 |
| F  | 7.0224426  | -0.9642945 | 15.4637783 |
| F  | -1.1994961 | 7.2349418  | 12.2993278 |
| F  | 0.7456527  | 8.2477517  | 12.3944195 |
| F  | -0.1148139 | 7.6831392  | 10.4633267 |
| C  | 5.1438228  | -0.5508630 | 14.0827124 |
| C  | 3.5255389  | 0.2519137  | 13.0536486 |
| C  | 2.3237325  | 0.5634941  | 12.3100853 |
| C  | 1.4165549  | -0.3202958 | 11.7298912 |
| H  | 1.5626022  | -1.3943273 | 11.8114494 |
| C  | 0.3094513  | 0.2348440  | 11.0802648 |
| C  | 0.1244712  | 1.6216385  | 10.9852705 |
| H  | -0.7475952 | 2.0404229  | 10.4908345 |
| C  | 1.0664256  | 2.4500445  | 11.5979786 |
| C  | 1.0825347  | 3.8957772  | 11.7097168 |
| C  | 0.7352827  | 5.9484685  | 11.8527905 |
| C  | 6.1307470  | -1.5507306 | 14.6187761 |
| C  | 0.0567505  | 7.2887278  | 11.7558950 |
| C  | 6.7569237  | 4.3584604  | 13.4180415 |
| C  | 7.2489294  | 3.0820390  | 13.1213686 |
| H  | 6.6021069  | 2.2109168  | 13.1950026 |
| C  | 8.5877244  | 2.9116338  | 12.7594100 |
| H  | 8.9557050  | 1.9122814  | 12.5293497 |
| C  | 9.4451673  | 4.0092646  | 12.6851363 |
| H  | 10.4868393 | 3.8726708  | 12.3921601 |
| C  | 8.9616809  | 5.2862912  | 12.9851154 |
| H  | 9.6222301  | 6.1525211  | 12.9288864 |
| C  | 7.6283729  | 5.4623341  | 13.3526325 |

|    |            |            |            |
|----|------------|------------|------------|
| H  | 7.2602646  | 6.4641334  | 13.5716533 |
| C  | 4.7432656  | 6.3496953  | 13.4689068 |
| C  | 4.8981196  | 6.6634616  | 12.1079278 |
| H  | 5.0760884  | 5.8749320  | 11.3740024 |
| C  | 4.8083896  | 7.9873829  | 11.6889285 |
| H  | 4.9354482  | 8.2259789  | 10.6346391 |
| C  | 4.5251743  | 8.9992776  | 12.6112663 |
| H  | 4.4360281  | 10.0329987 | 12.2752402 |
| C  | 4.3428922  | 8.6852890  | 13.9580924 |
| H  | 4.1011272  | 9.4639837  | 14.6807926 |
| C  | 4.4644767  | 7.3634638  | 14.3927084 |
| H  | 4.3227365  | 7.1418890  | 15.4477378 |
| H  | 4.2613904  | 5.1955456  | 16.1680116 |
| H  | 6.0273856  | 5.2260553  | 16.0468100 |
| H  | 6.0028468  | 3.1653248  | 17.1642306 |
| H  | 5.4392094  | 2.4435787  | 15.6612010 |
| N  | 0.1862594  | 4.8167662  | 11.3450710 |
| N  | 4.0764188  | -0.9263855 | 13.3481576 |
| N  | 0.2066282  | 6.7140062  | 15.3318878 |
| N  | -0.0070837 | -0.4705047 | 14.5311866 |
| Cl | -3.7053899 | 3.5005643  | 12.4513978 |
| Cl | -0.8620791 | -0.8121197 | 10.3734587 |
